# Supplementary material for: Regio- and enantioselective ring-opening reaction of vinylcyclopropanes with indoles under cooperative catalysis
Source: Royal Society of Chemistry journal article supplement (doi:10.1039/d0qo00699h), 2020-08-17
Supplement: d0qo00699h1.pdf [file d0qo00699h1.pdf]

## *Supporting Information for*

# **Regio- and Enantioselective Ring-Opening Reaction of Vinylcyclopropanes with Indoles under Cooperative Catalysis**

Xiao Wan,<sup>a</sup> Meng Sun,<sup>a</sup> Jing-Yi Wang,<sup>a</sup> Lei Yu,<sup>a</sup> Qiong Wu,<sup>\*b</sup> Yu-Chen Zhang<sup>\*a</sup> and Feng Shi<sup>\*a</sup>

<sup>a</sup>*School of Chemistry and Materials Science, Jiangsu Normal University, Xuzhou, 221116, China.*

*E-mail: [fshi@jsnu.edu.cn](mailto:fshi@jsnu.edu.cn); [zhangyc@jsnu.edu.cn](mailto:zhangyc@jsnu.edu.cn)*

<sup>b</sup>*School of Materials and Chemical Engineering, Xuzhou University of Technology, Xuzhou*

*221018, China. E-mail: [hgwuqiong@xzit.edu.cn](mailto:hgwuqiong@xzit.edu.cn)*

### **Contents:**

**1. NMR spectra of products 3 and 5-6 (S2-S29)**

**2. HPLC spectra of product 3 and 5-6 (S30-S55)**

**3. X-ray single-crystal data of product 3aa (S56-S57)**

## 1. NMR spectra of products 3 and 5-6

### $^1\text{H}$ NMR (400 MHz, $\text{CDCl}_3$ ) of compound **3aa**

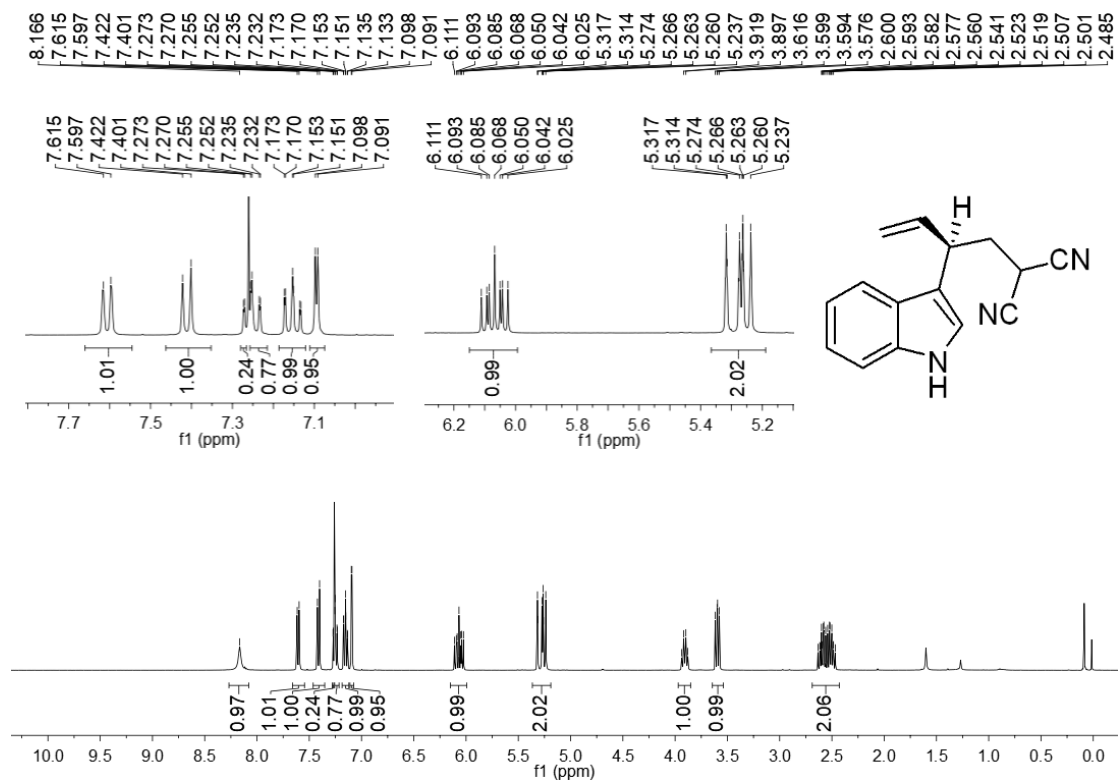

### $^{13}\text{C}$ NMR (100 MHz, $\text{CDCl}_3$ ) of compound **3aa**

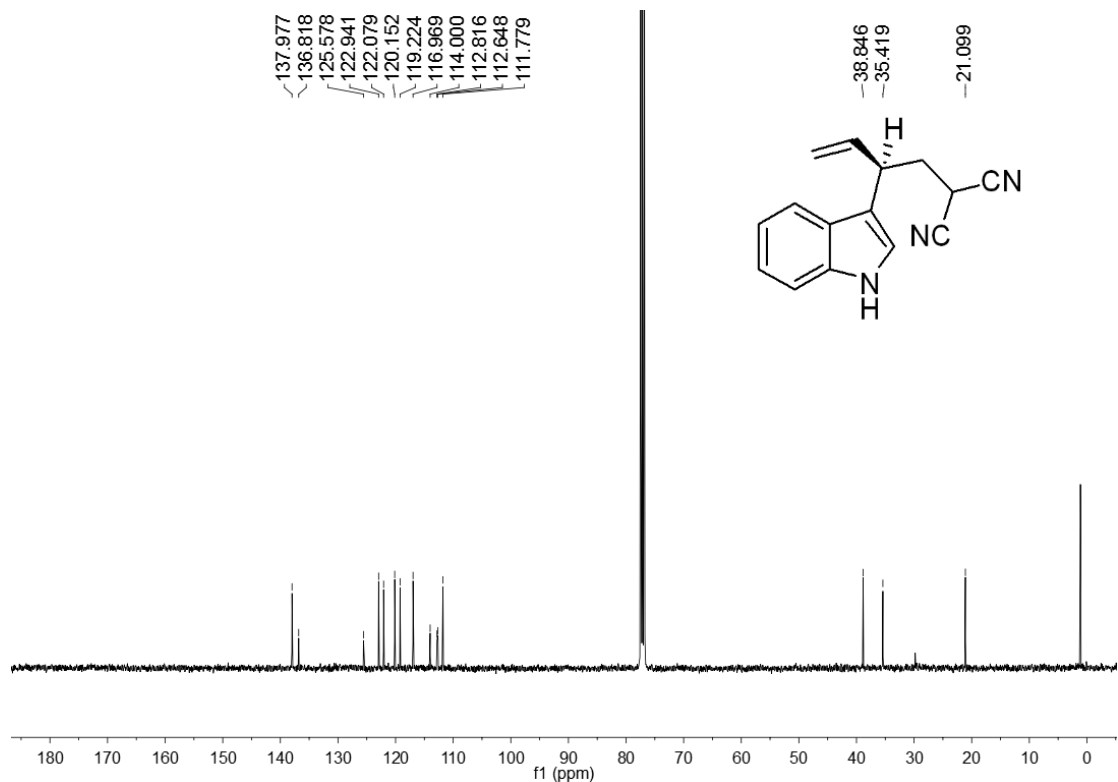

<sup>1</sup>H NMR (400 MHz, CDCl<sub>3</sub>) of compound **3ba**

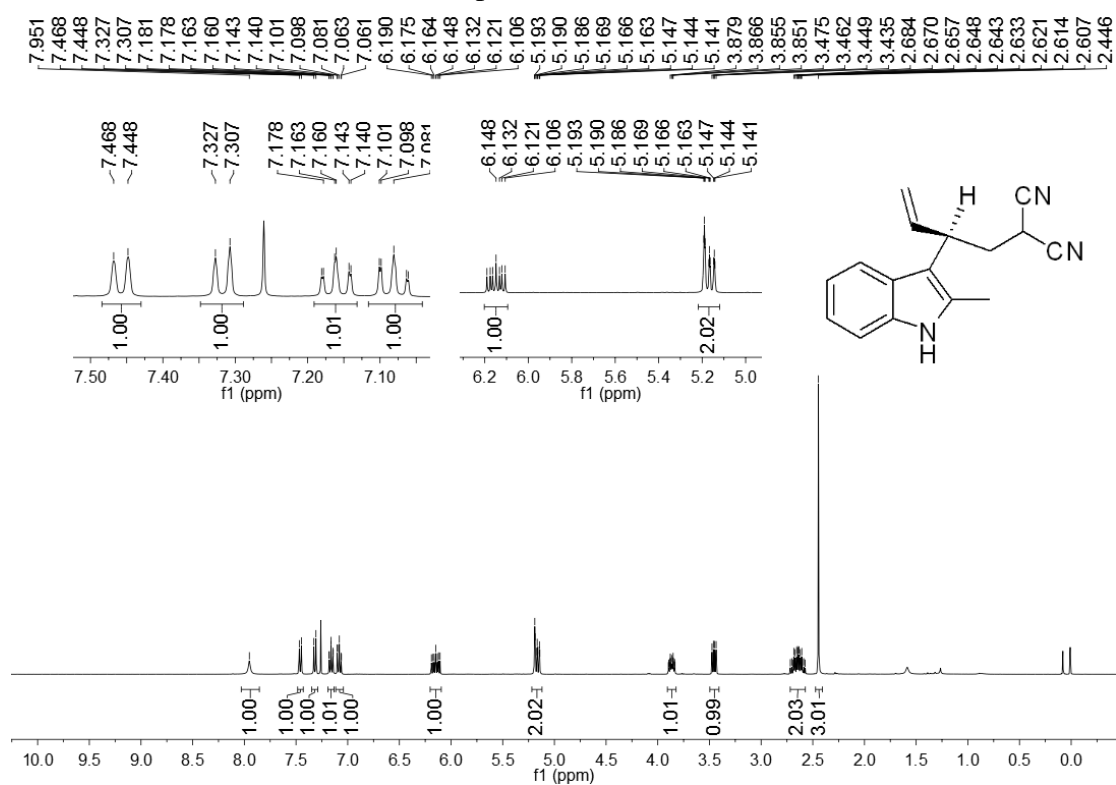

<sup>13</sup>C NMR (100 MHz, CDCl<sub>3</sub>) of compound **3ba**

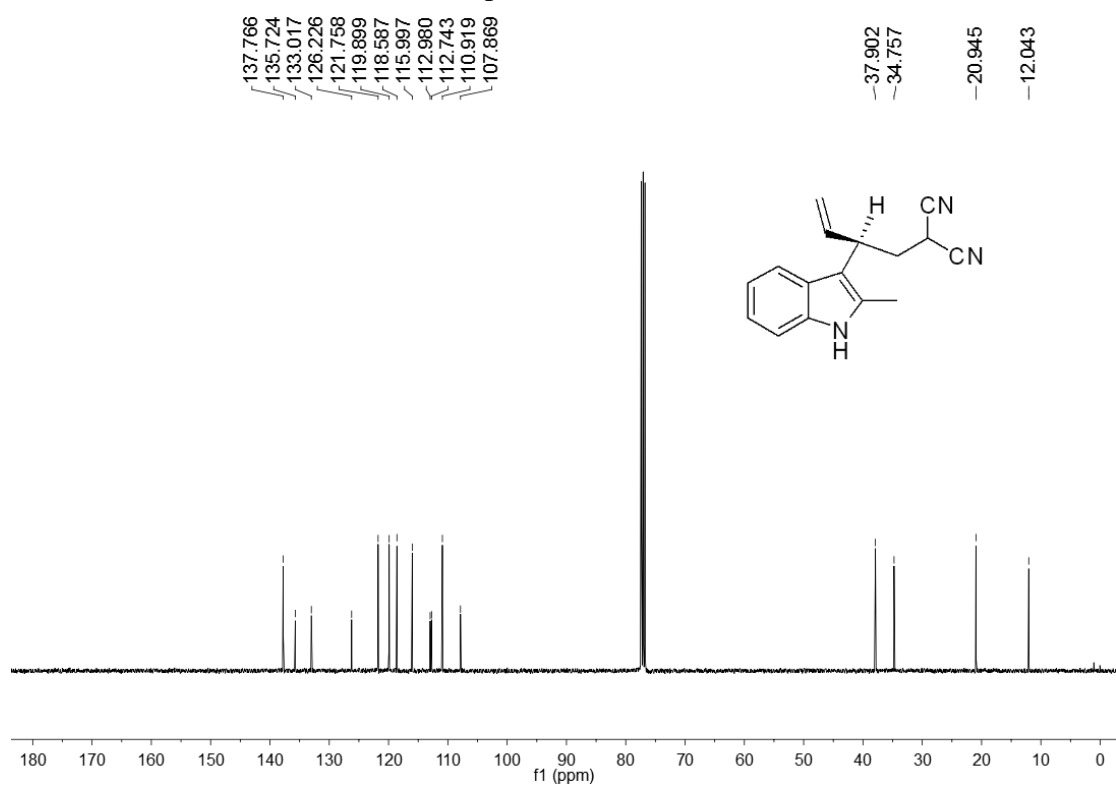

$^1\text{H}$  NMR (400 MHz,  $\text{CDCl}_3$ ) of compound **3ca**

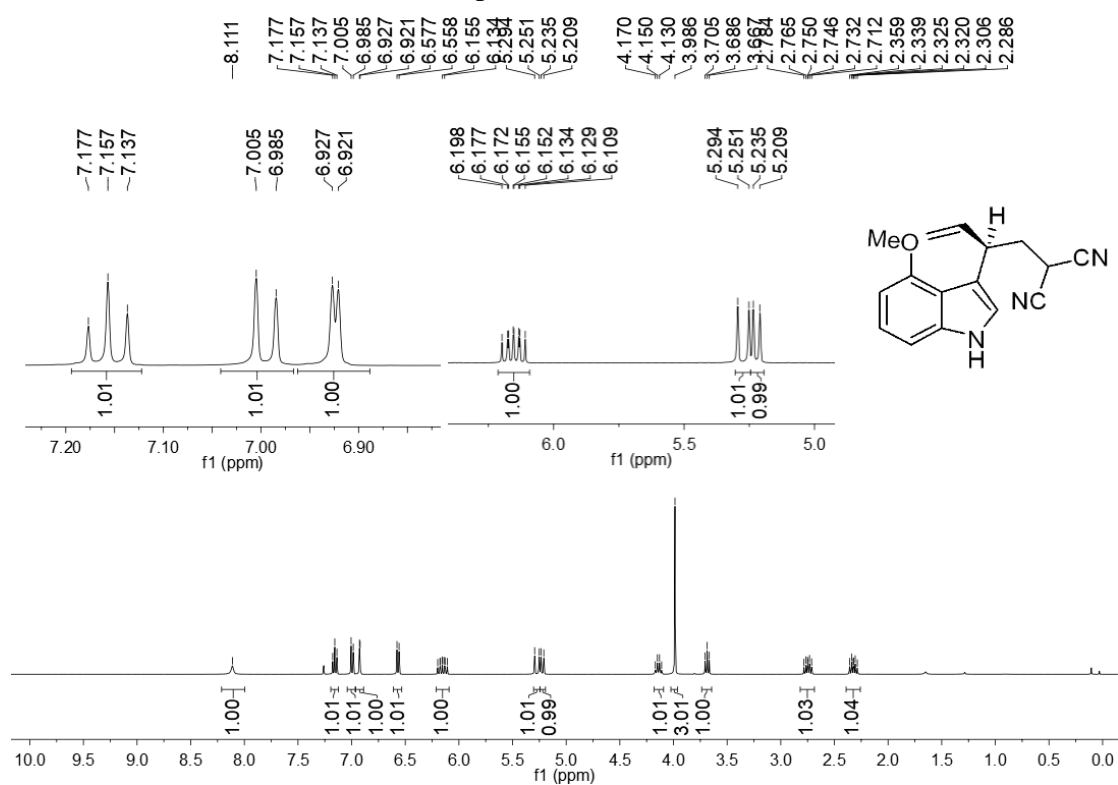

$^{13}\text{C}$  NMR (100 MHz,  $\text{CDCl}_3$ ) of compound **3ca**

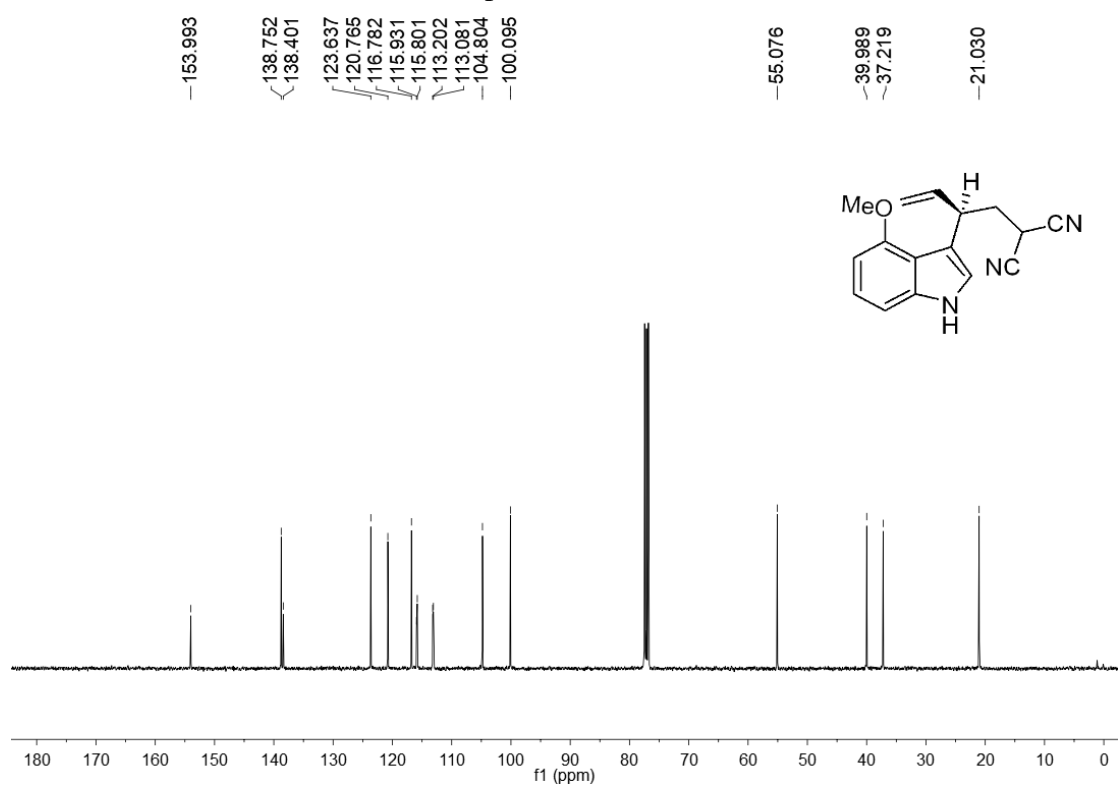

<sup>1</sup>H NMR (400 MHz, CDCl<sub>3</sub>) of compound **3da**

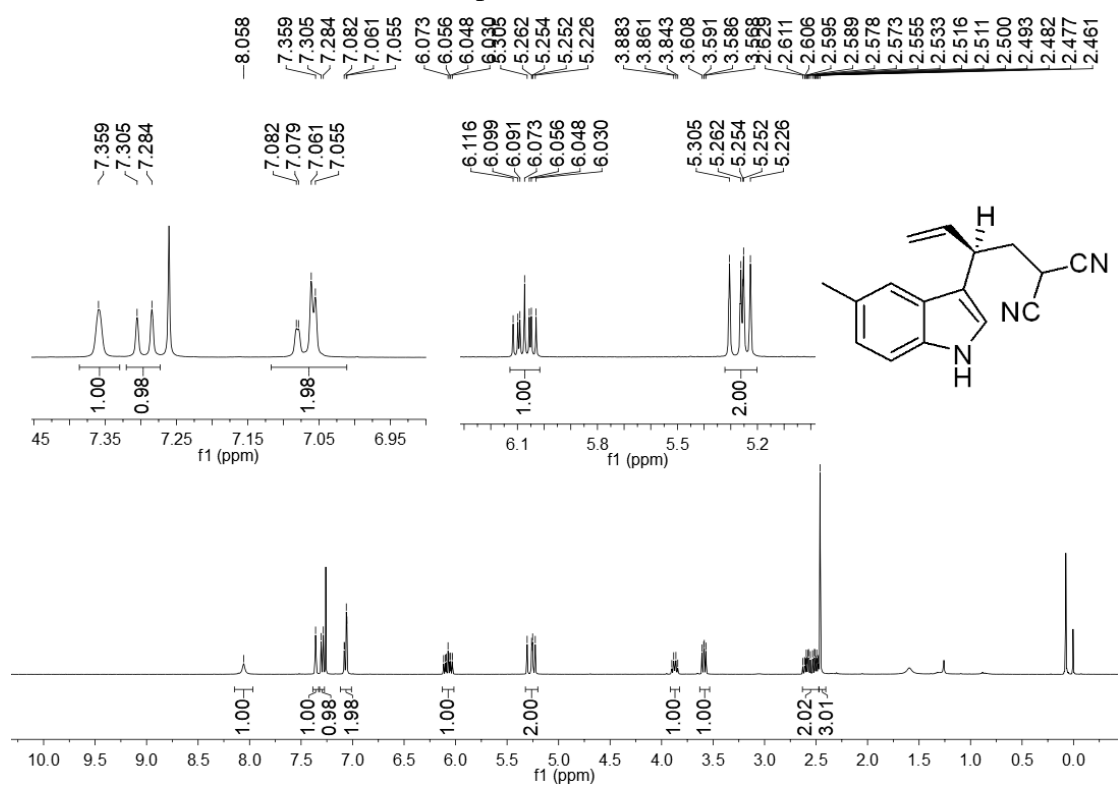

<sup>13</sup>C NMR (100 MHz, CDCl<sub>3</sub>) of compound **3da**

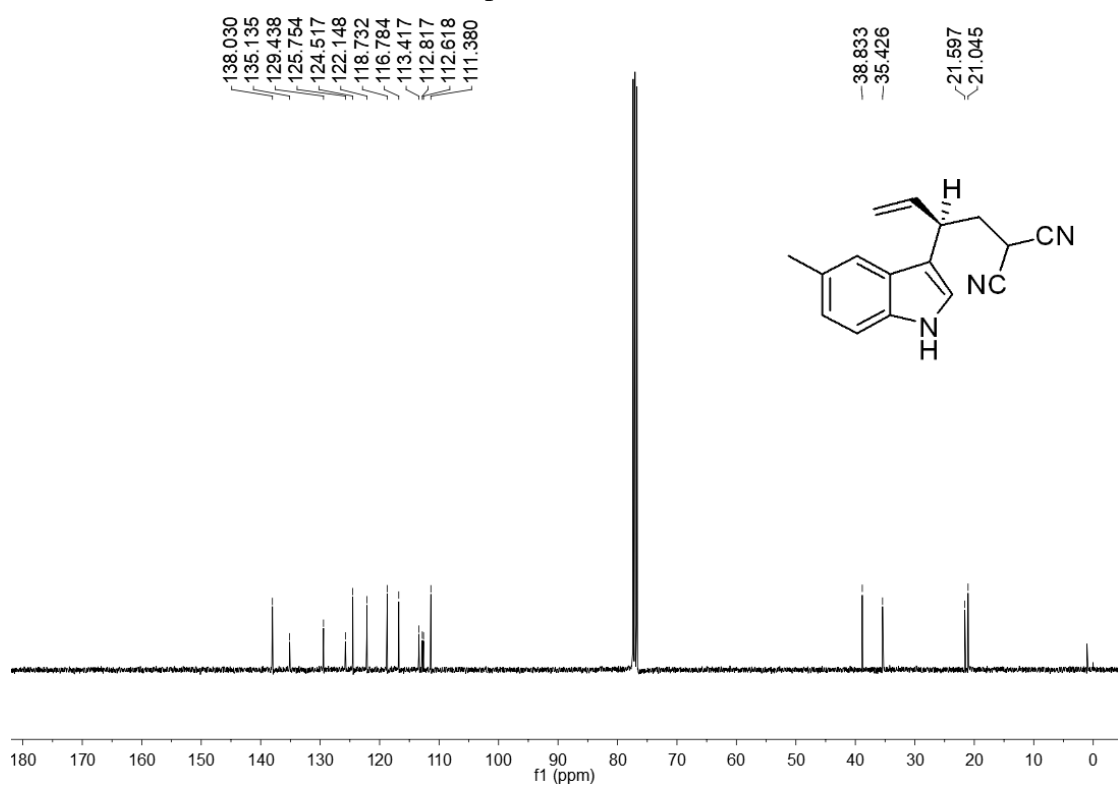

<sup>1</sup>H NMR (400 MHz, CDCl<sub>3</sub>) of compound **3ea**

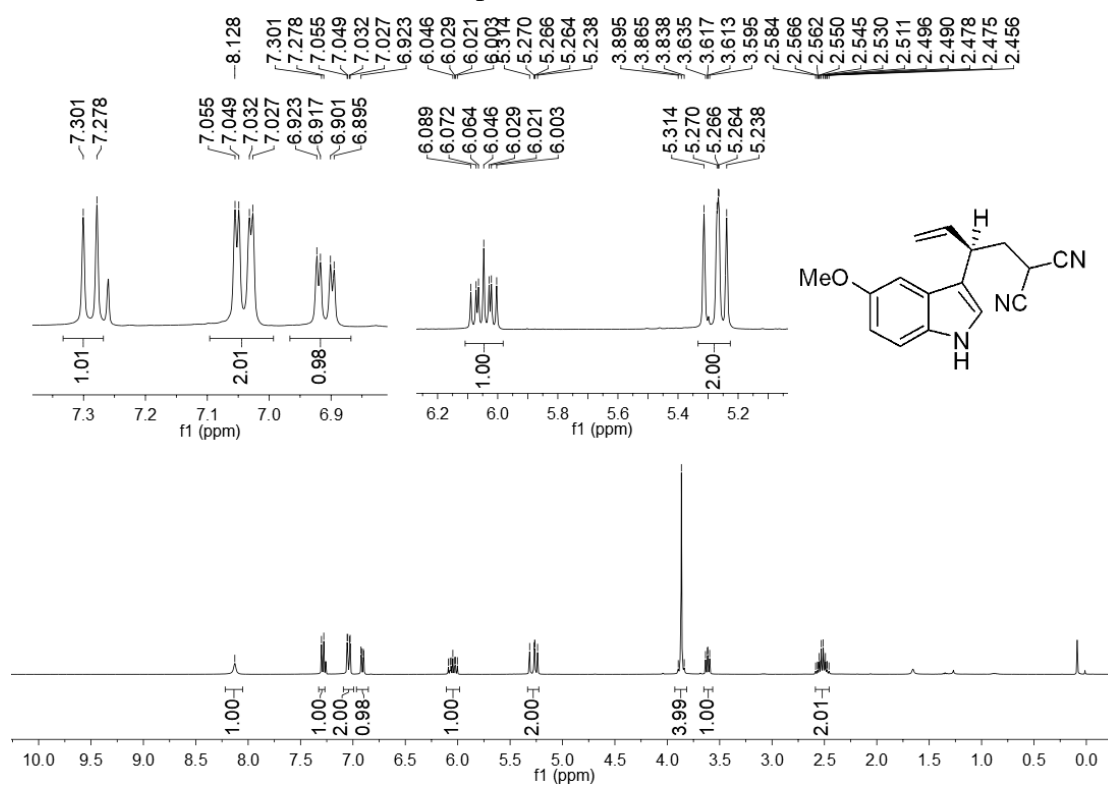

<sup>13</sup>C NMR (100 MHz, CDCl<sub>3</sub>) of compound **3ea**

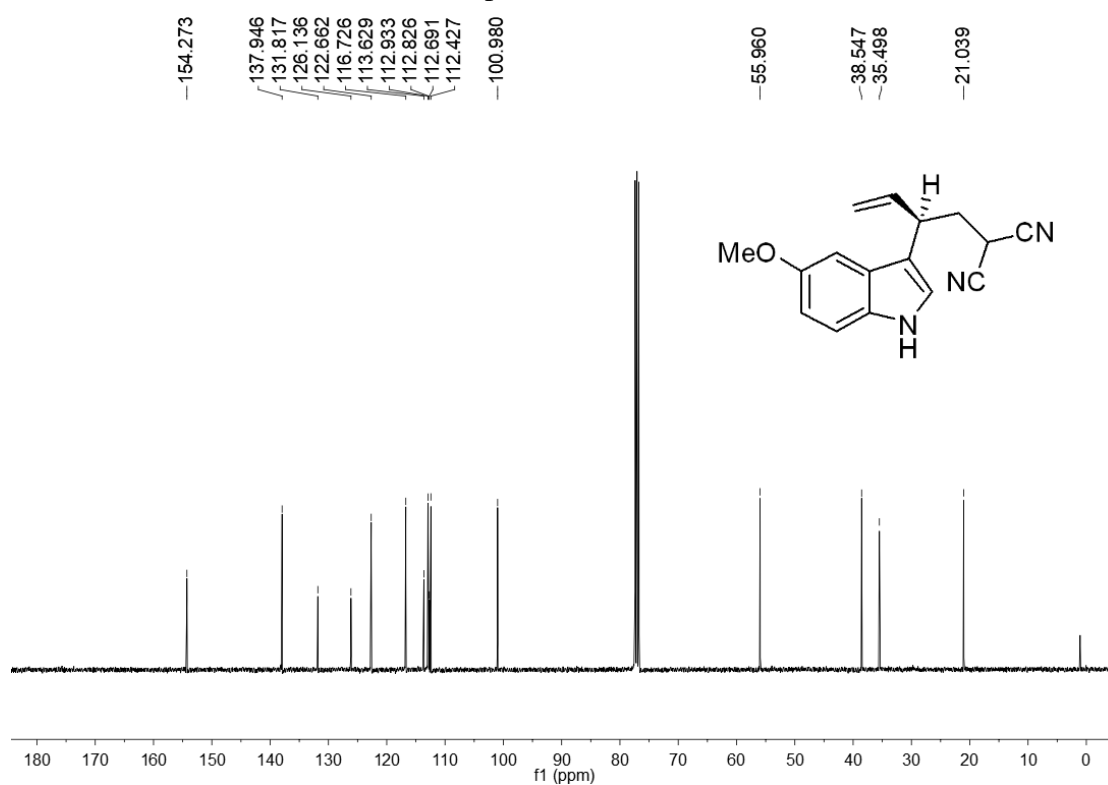

$^1\text{H}$  NMR (400 MHz,  $\text{CDCl}_3$ ) of compound **3fa**

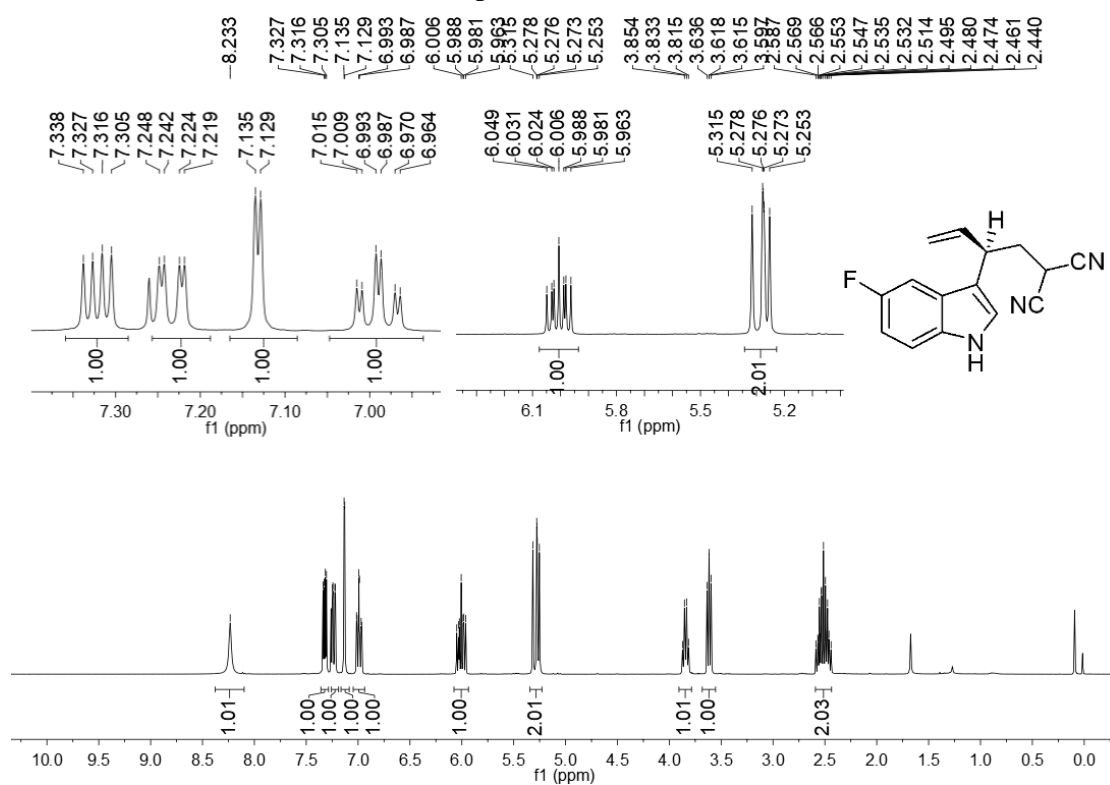

$^{13}\text{C}$  NMR (100 MHz,  $\text{CDCl}_3$ ) of compound **3fa**

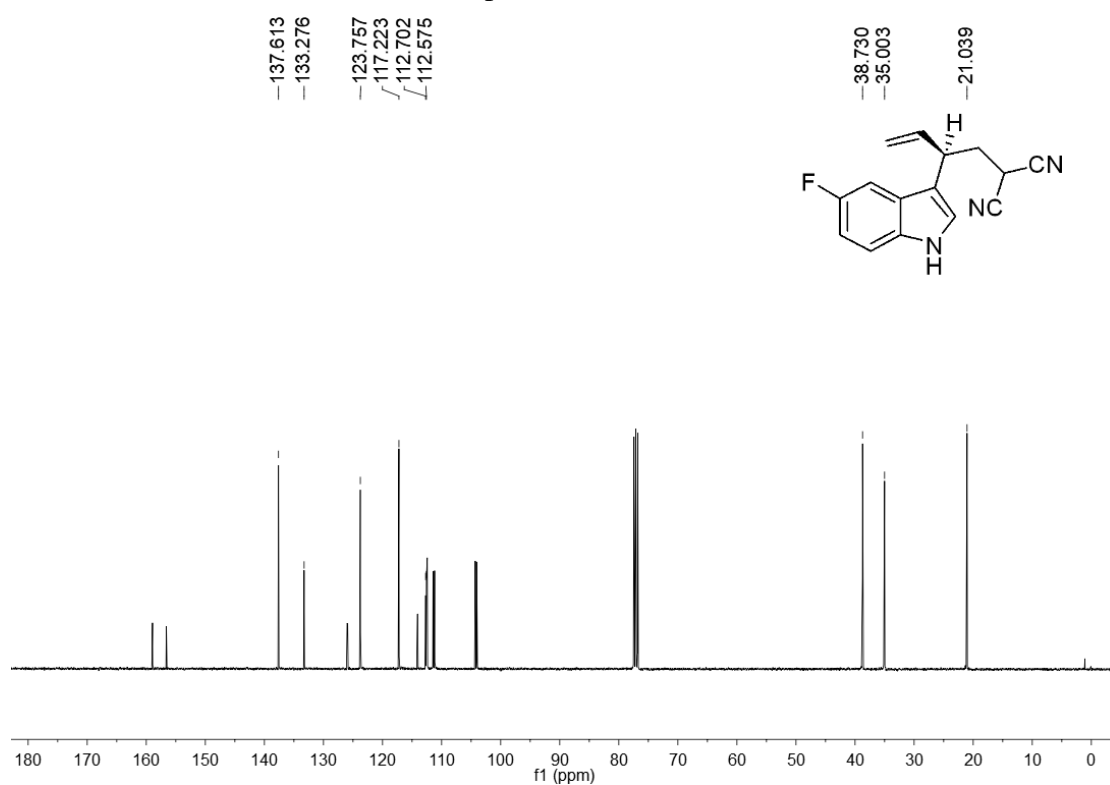

$^{19}\text{F}$  NMR (376 MHz,  $\text{CDCl}_3$ ) of compound **3fa**

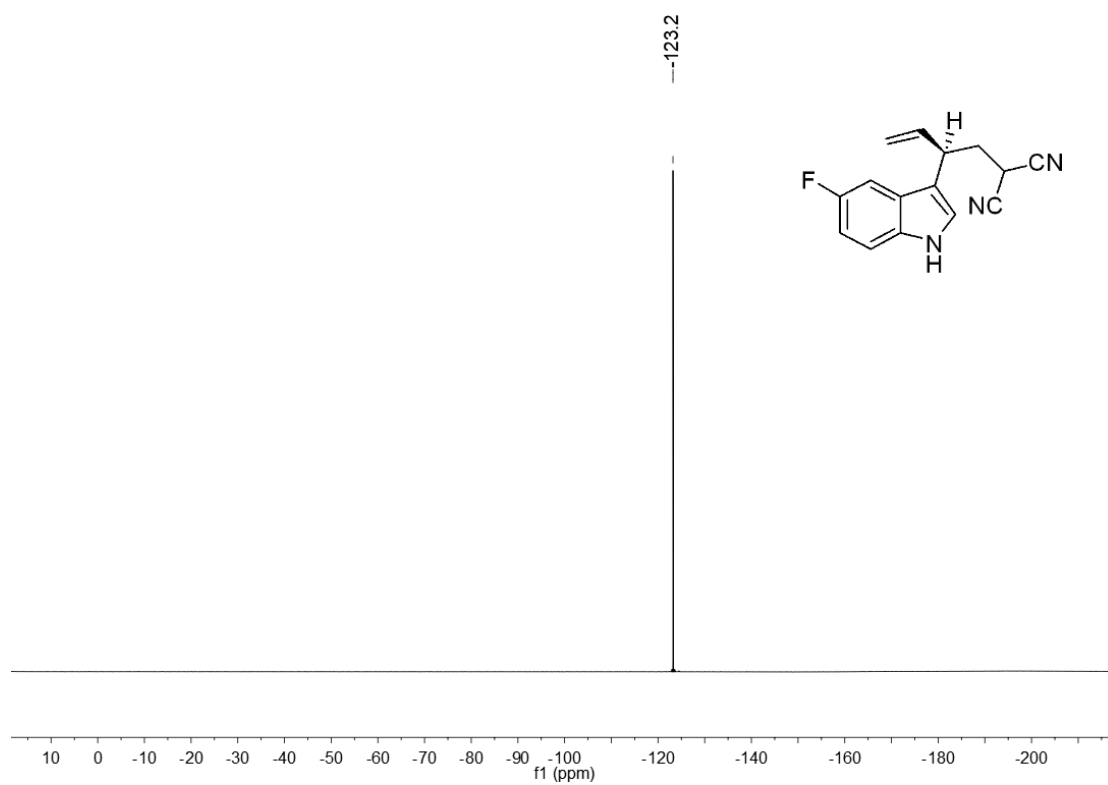



$^1\text{H}$  NMR (400 MHz,  $\text{CDCl}_3$ ) of compound **3ga**

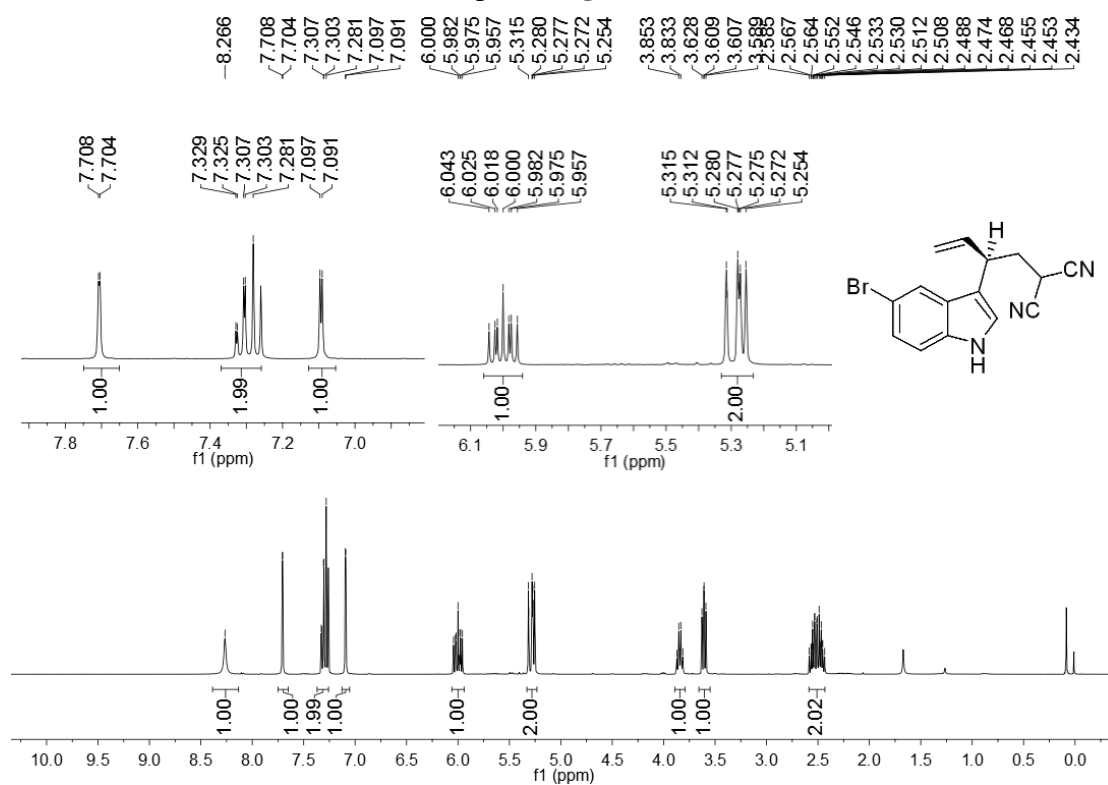

$^{13}\text{C}$  NMR (100 MHz,  $\text{CDCl}_3$ ) of compound **3ga**

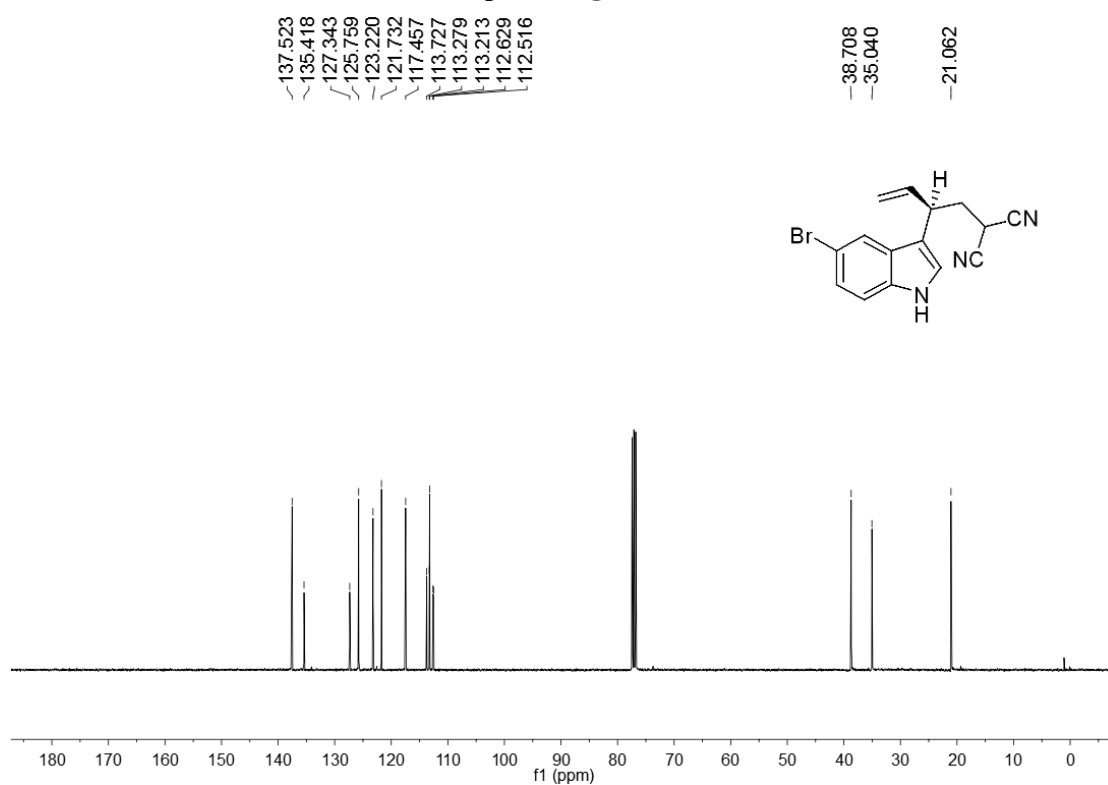

<sup>1</sup>H NMR (400 MHz, CDCl<sub>3</sub>) of compound **3ha**

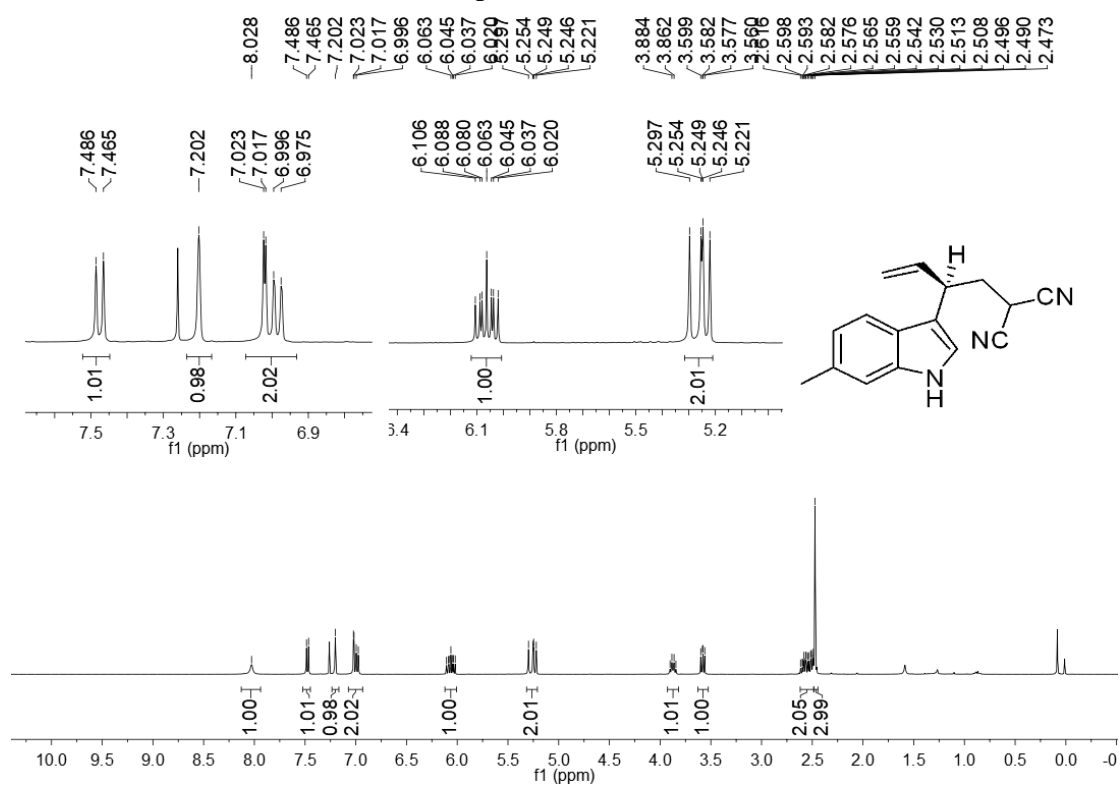

<sup>13</sup>C NMR (100 MHz, CDCl<sub>3</sub>) of compound **3ha**

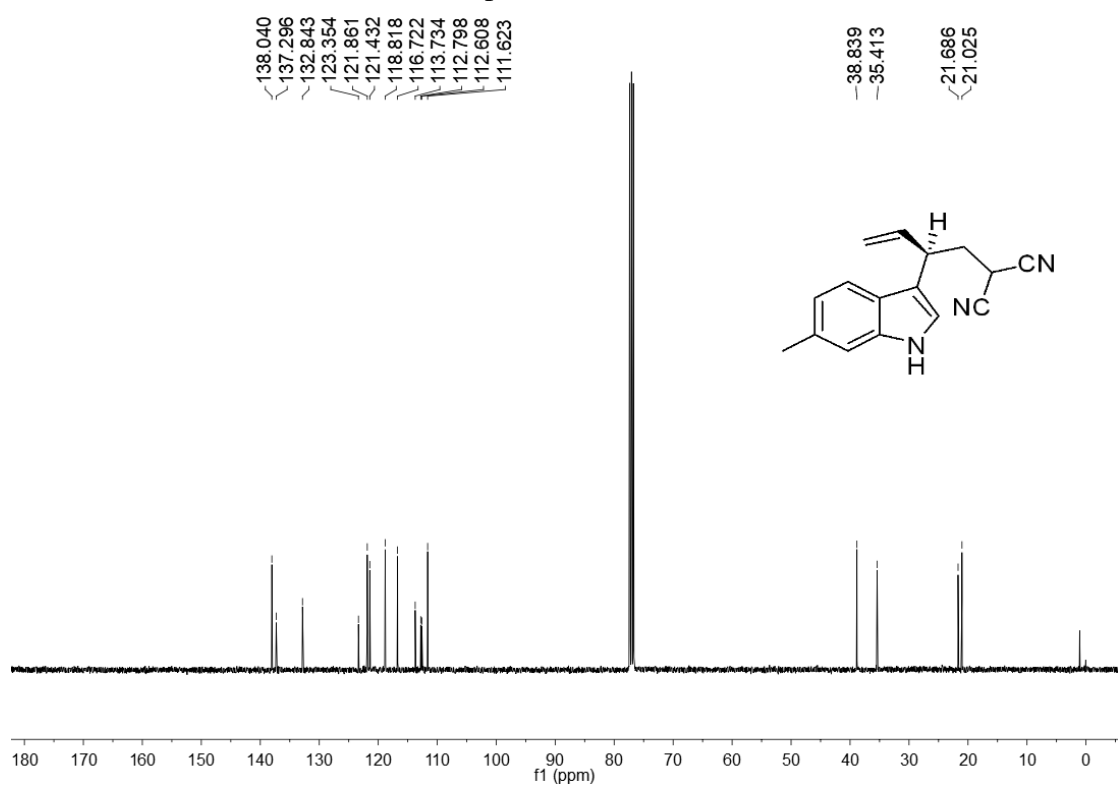

<sup>1</sup>H NMR (400 MHz, CDCl<sub>3</sub>) of compound **3ia**

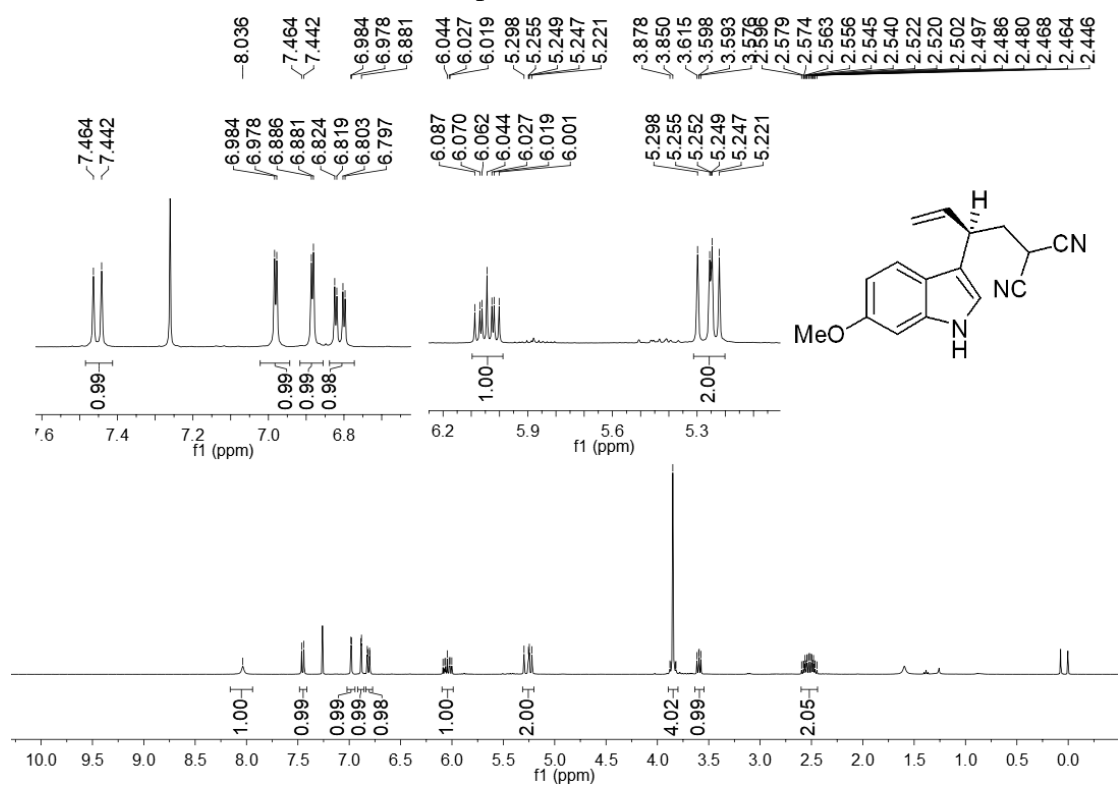

<sup>13</sup>C NMR (100 MHz, CDCl<sub>3</sub>) of compound **3ia**

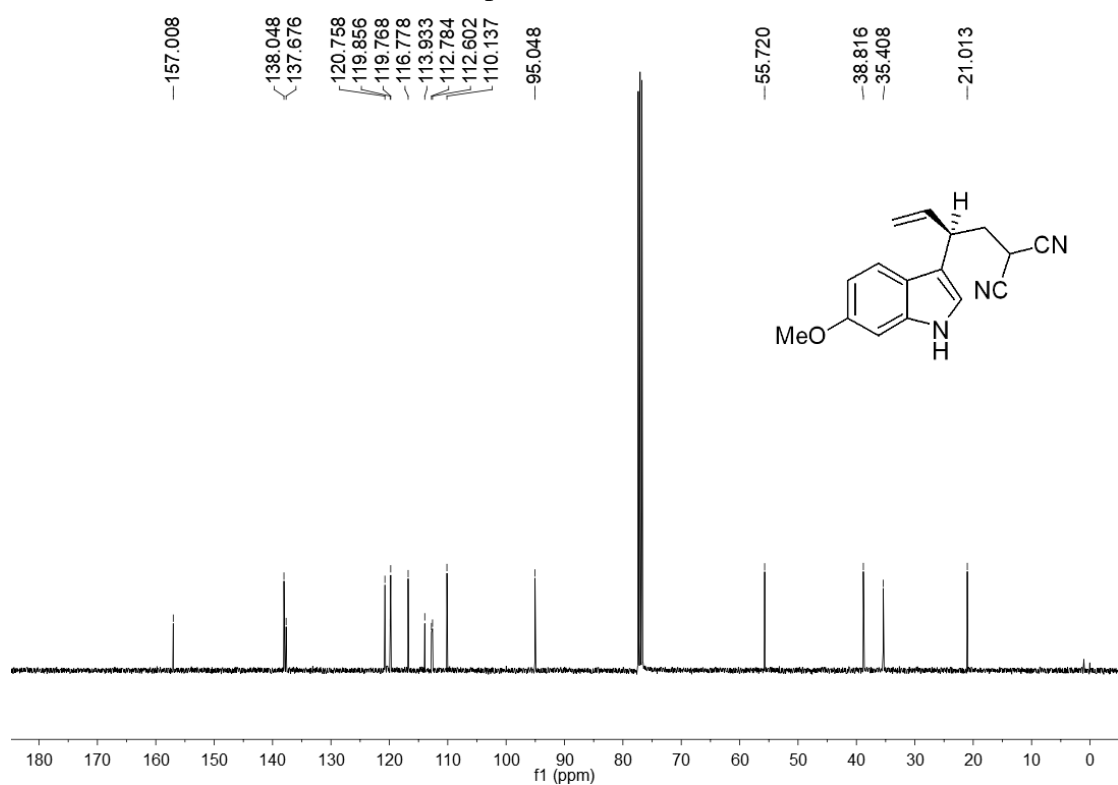

<sup>1</sup>H NMR (400 MHz, CDCl<sub>3</sub>) of compound **3ja**

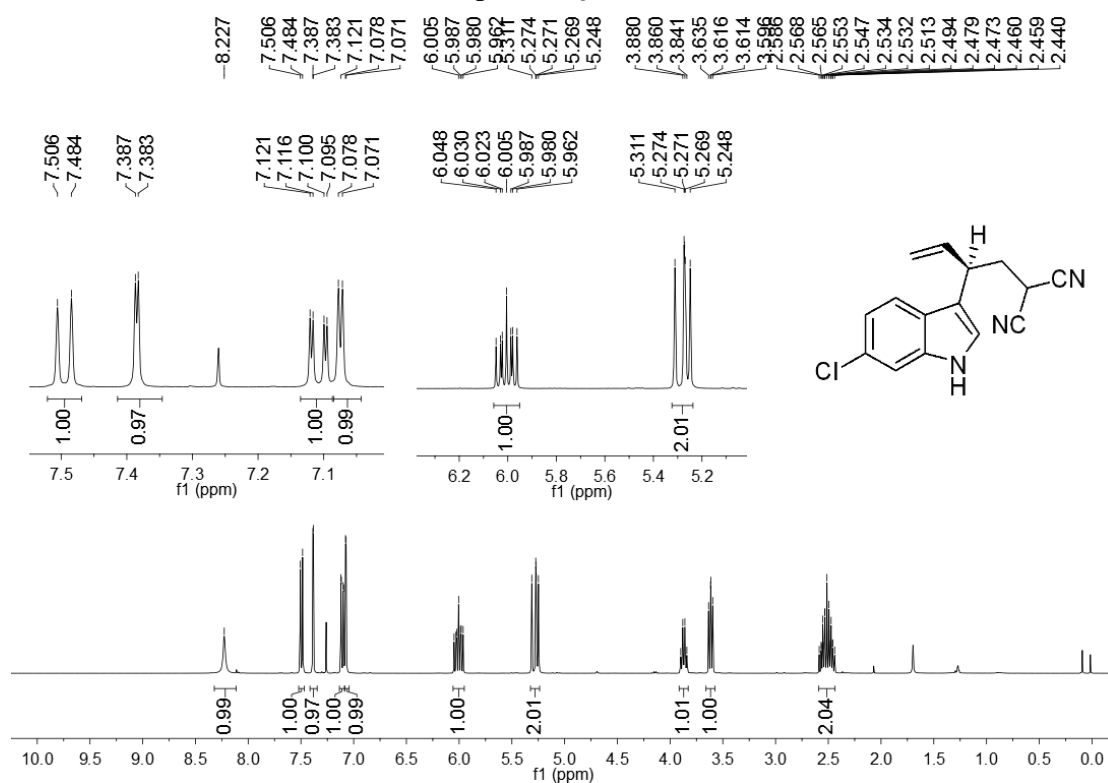

<sup>13</sup>C NMR (100 MHz, CDCl<sub>3</sub>) of compound **3ja**

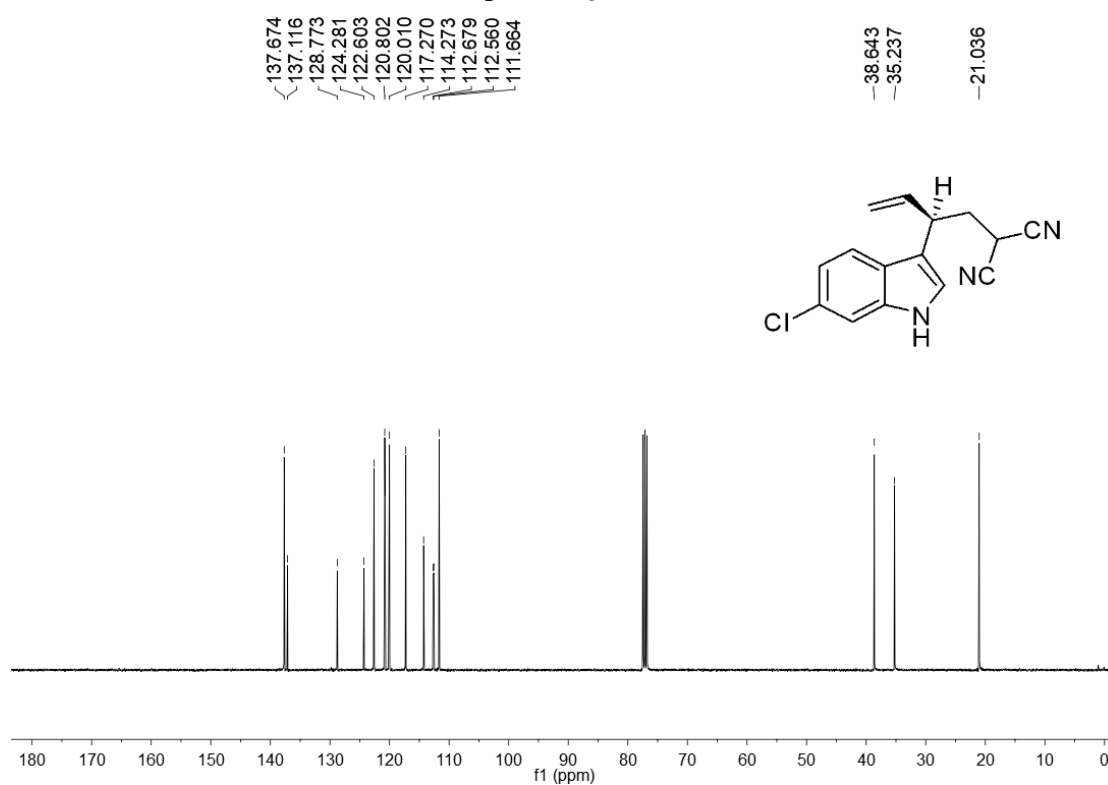

<sup>1</sup>H NMR (400 MHz, CDCl<sub>3</sub>) of compound **3ka**

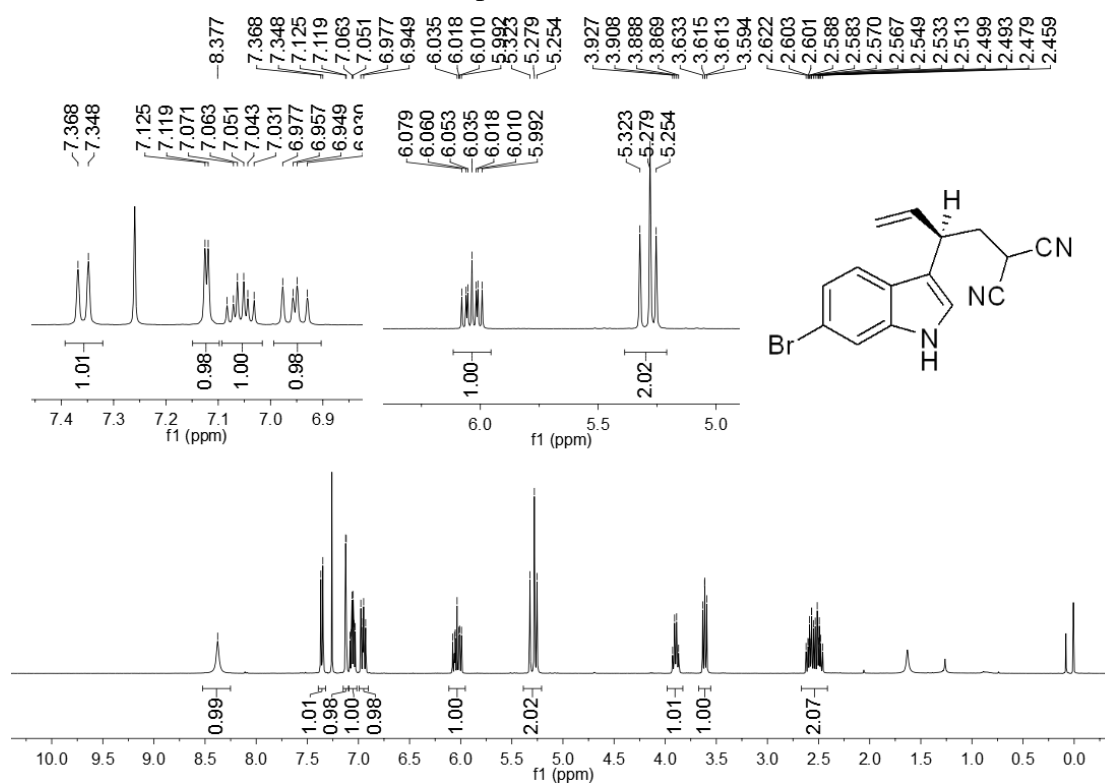

<sup>13</sup>C NMR (100 MHz, CDCl<sub>3</sub>) of compound **3ka**

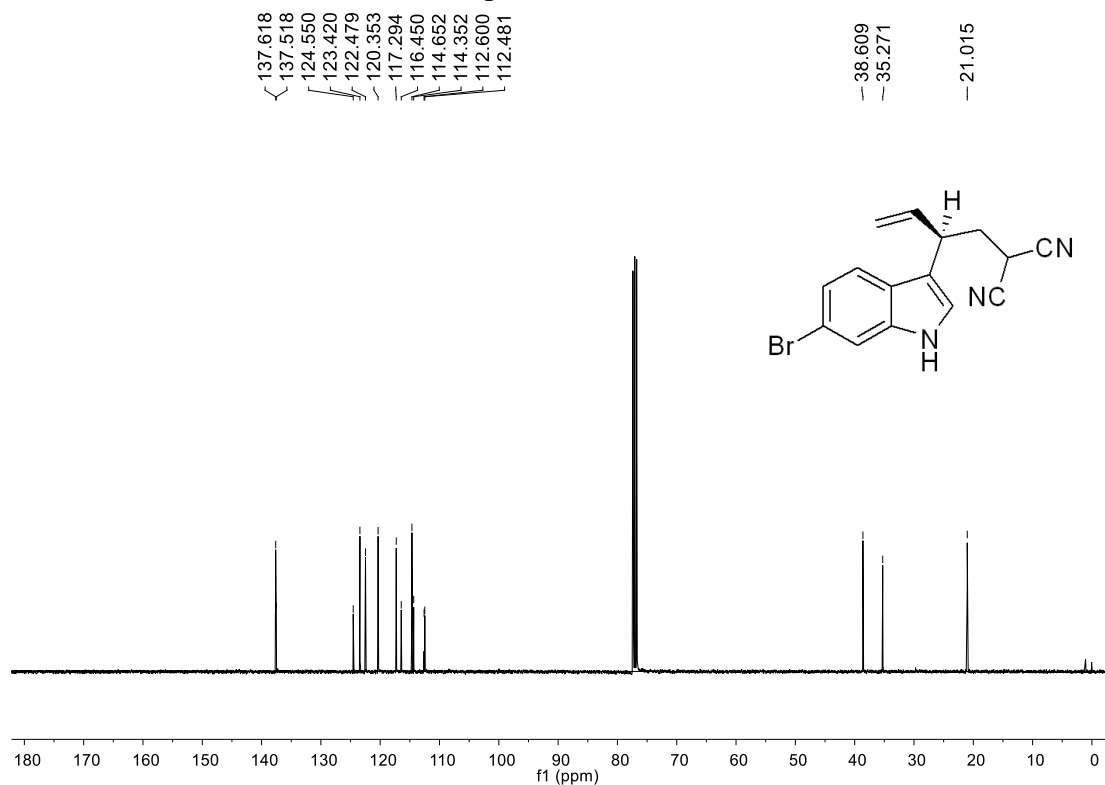

<sup>1</sup>H NMR (400 MHz, CDCl<sub>3</sub>) of compound **3la**

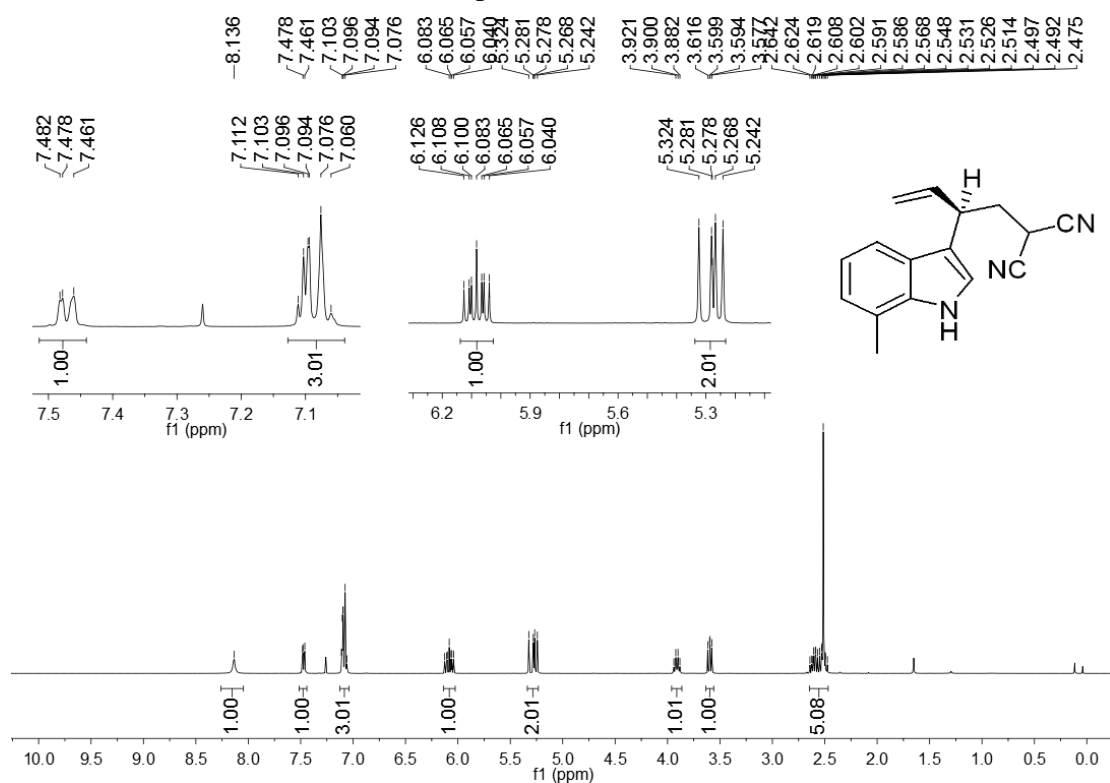

<sup>13</sup>C NMR (100 MHz, CDCl<sub>3</sub>) of compound **3la**

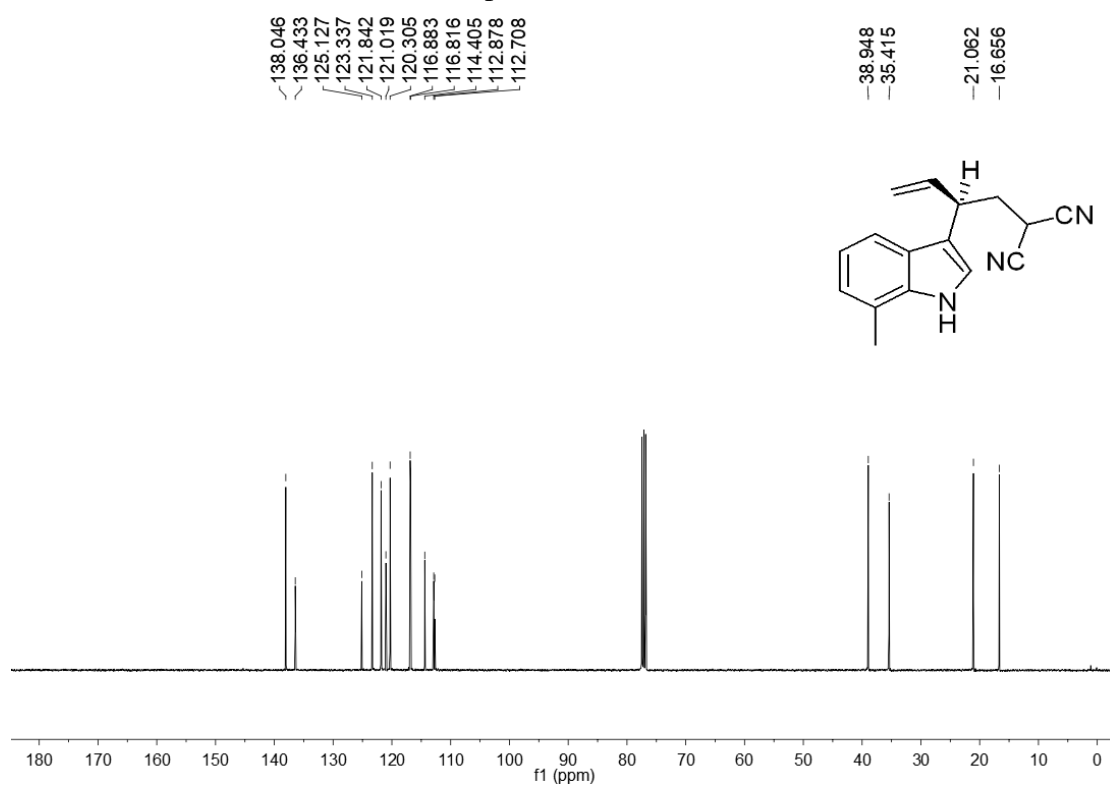

<sup>1</sup>H NMR (400 MHz, CDCl<sub>3</sub>) of compound **3ma**

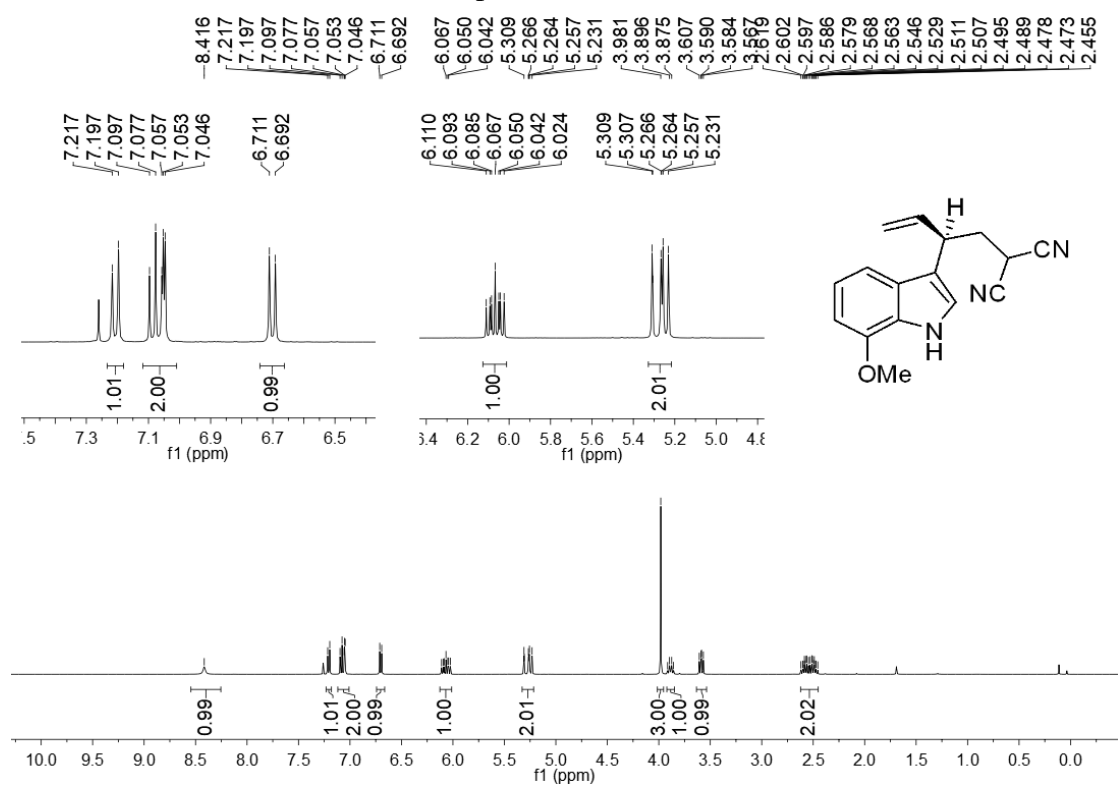

<sup>13</sup>C NMR (100 MHz, CDCl<sub>3</sub>) of compound **3ma**

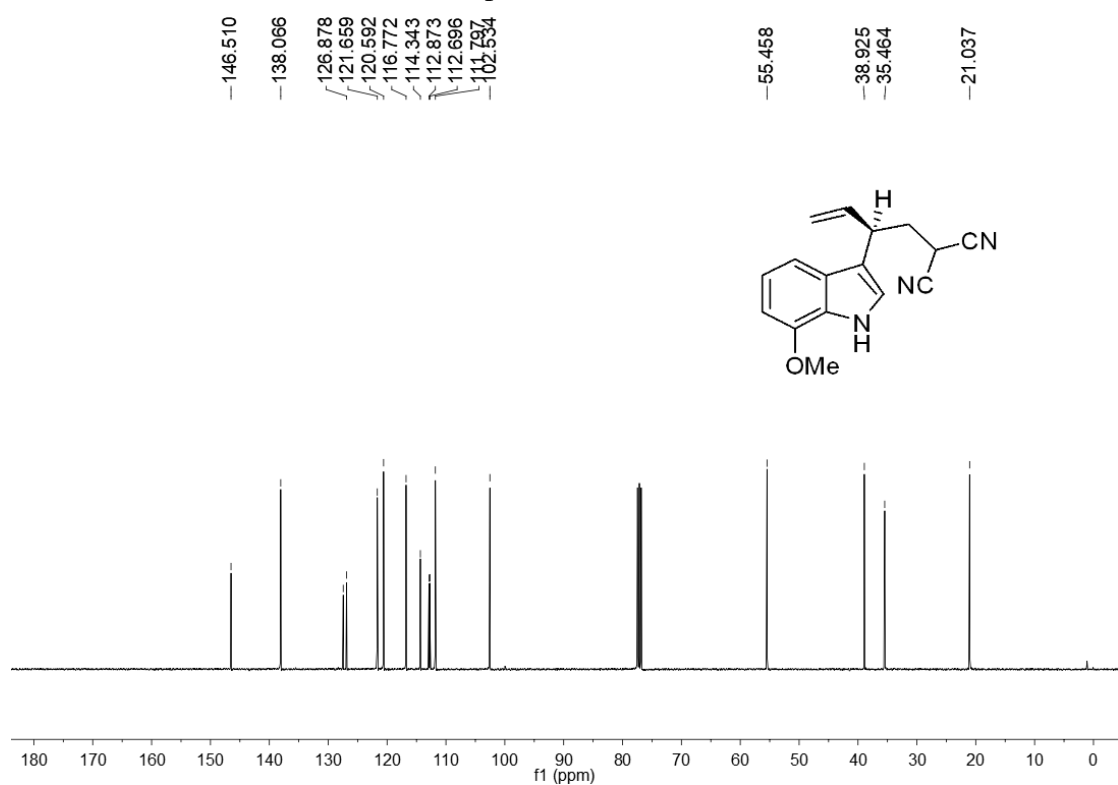

$^1\text{H}$  NMR (400 MHz,  $\text{CDCl}_3$ ) of compound **3na**

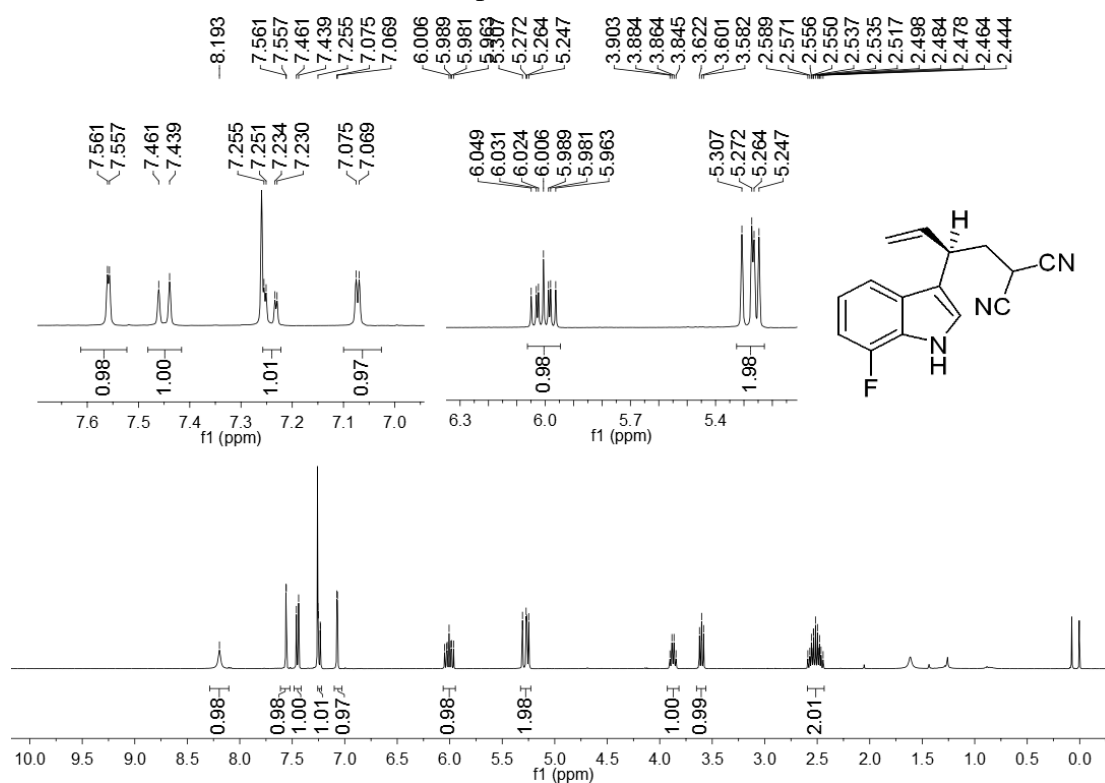

$^{13}\text{C}$  NMR (100 MHz,  $\text{CDCl}_3$ ) of compound **3na**

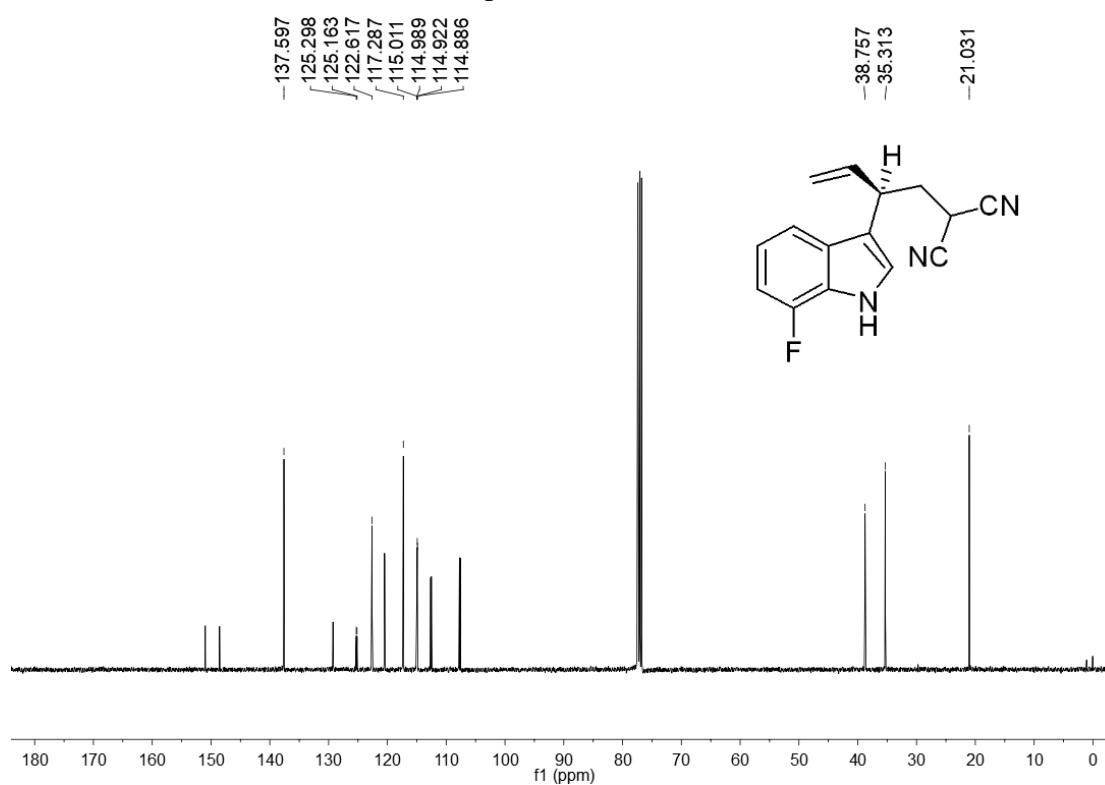



$^{19}\text{F}$  NMR (376 MHz,  $\text{CDCl}_3$ ) of compound **3na**

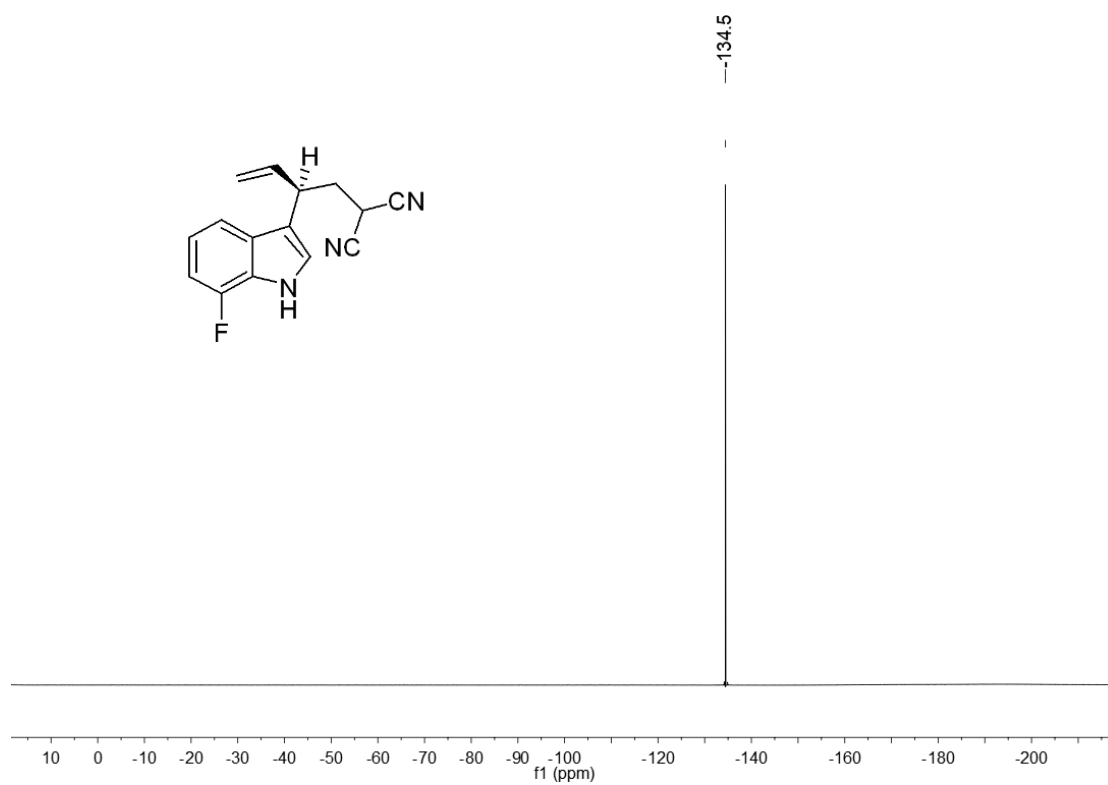

<sup>1</sup>H NMR (400 MHz, CDCl<sub>3</sub>) of compound **3oa**

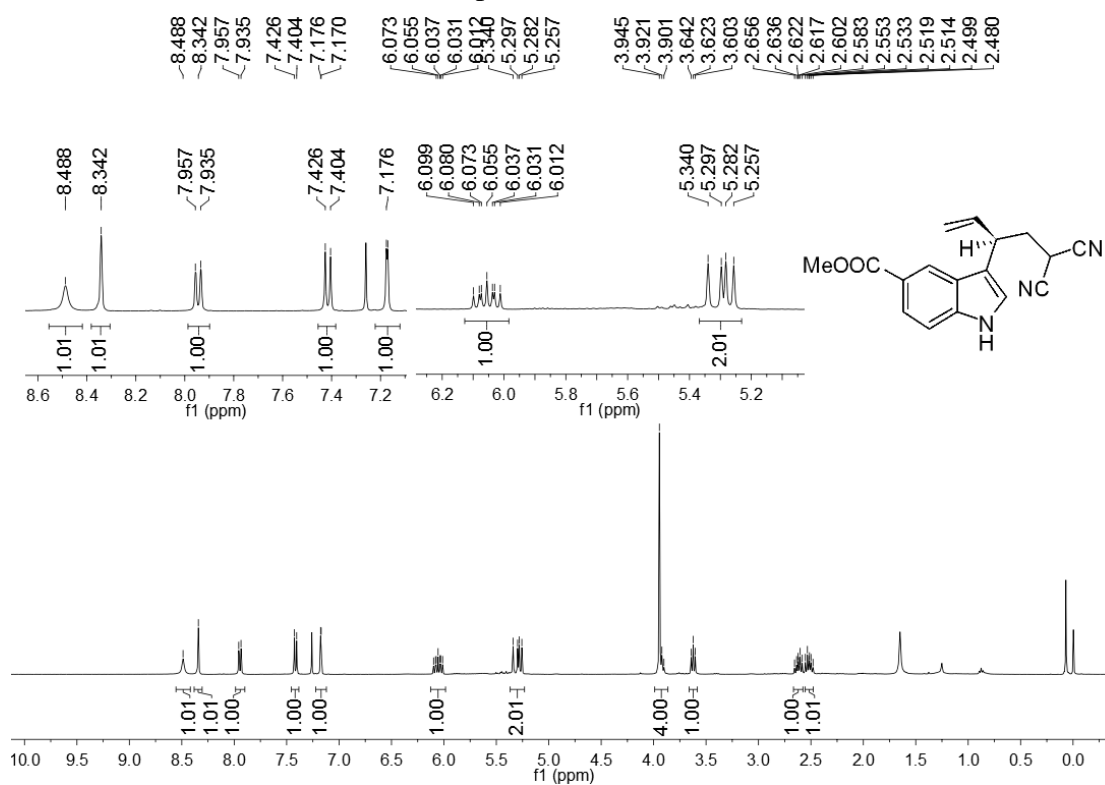

<sup>13</sup>C NMR (100 MHz, CDCl<sub>3</sub>) of compound **3oa**

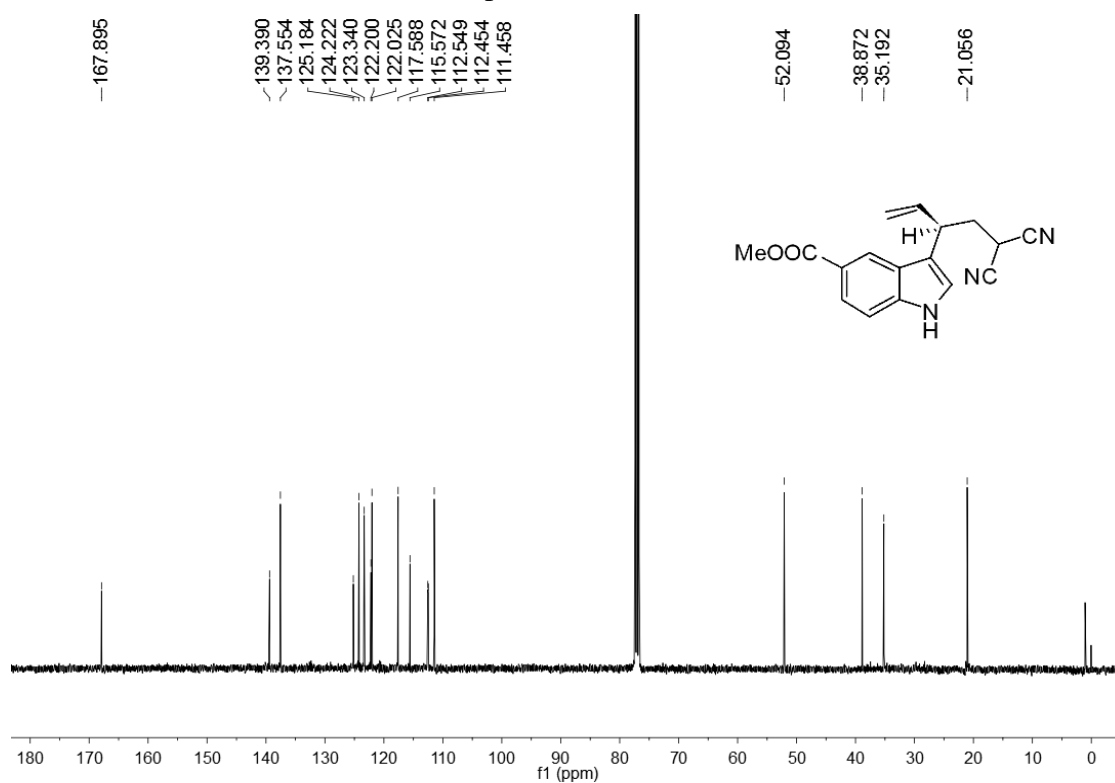

<sup>1</sup>H NMR (400 MHz, CDCl<sub>3</sub>) of compound **3qa**

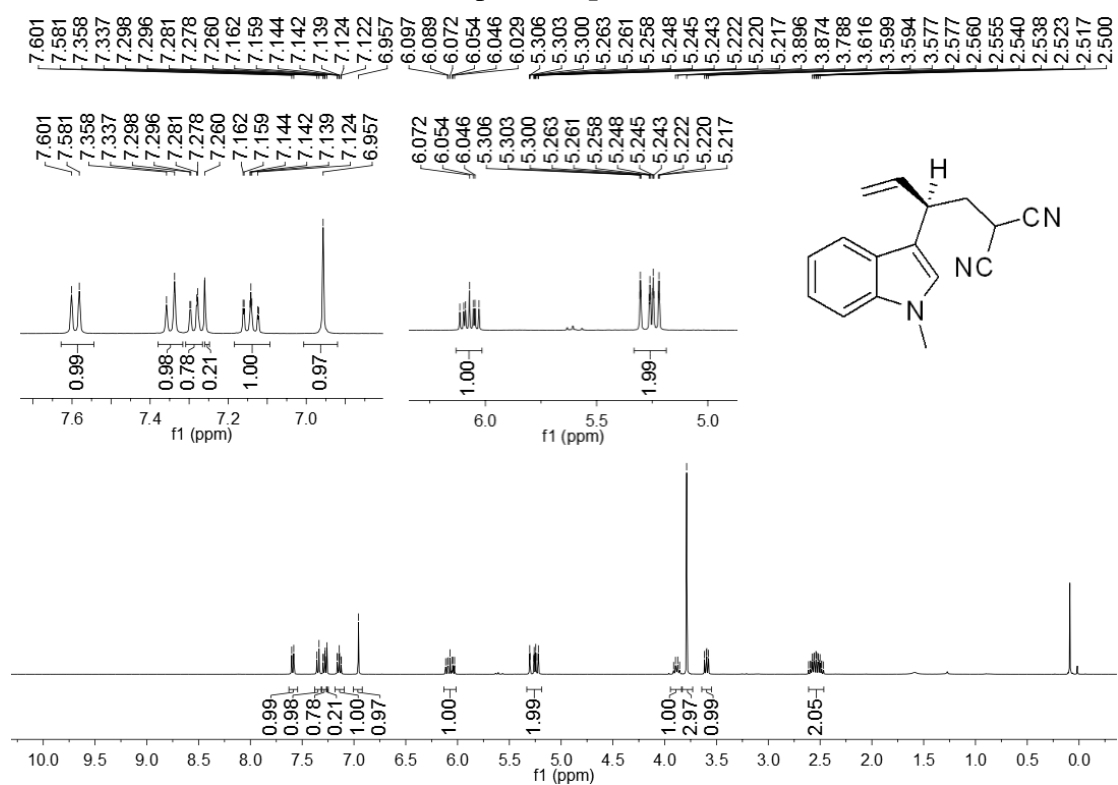

<sup>13</sup>C NMR (100 MHz, CDCl<sub>3</sub>) of compound **3qa**

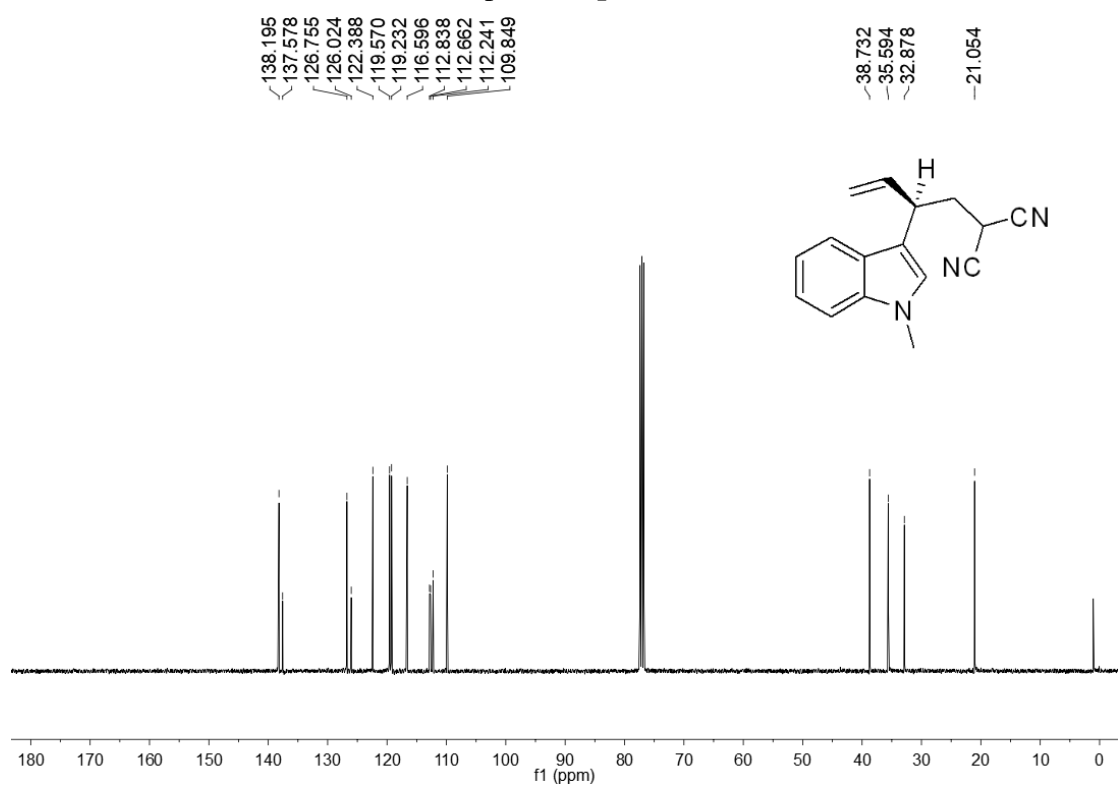

<sup>1</sup>H NMR (400 MHz, CDCl<sub>3</sub>) of compound **3ab**

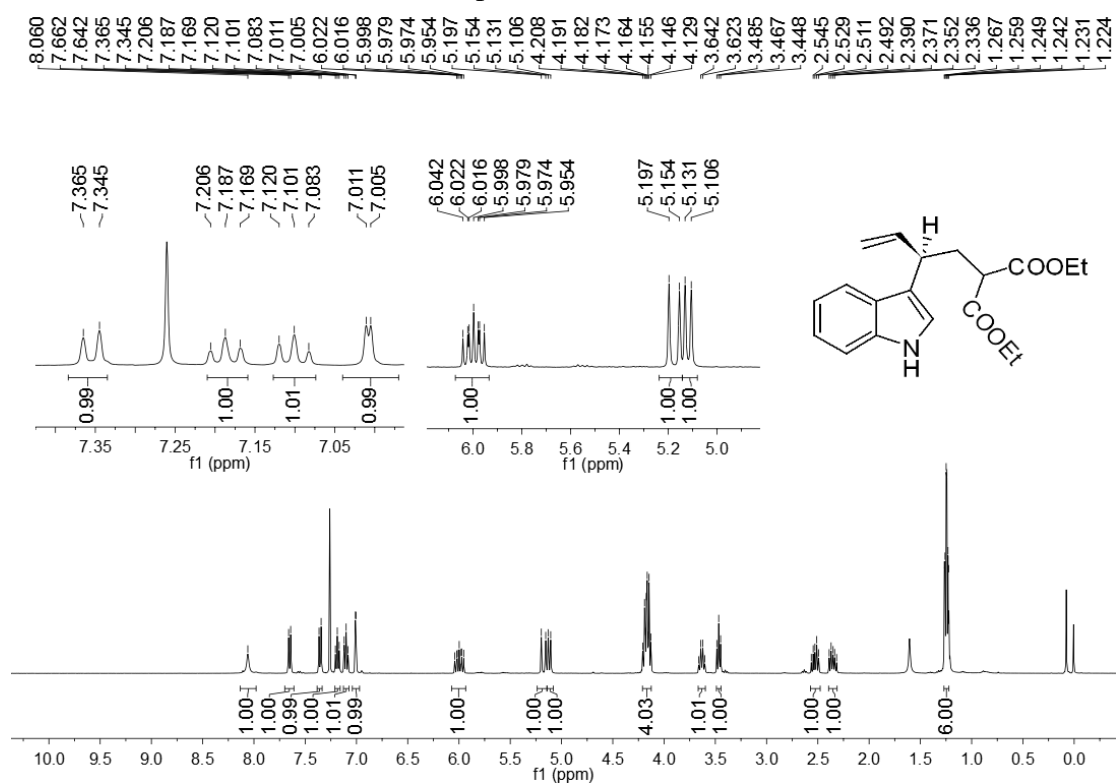

<sup>13</sup>C NMR (100 MHz, CDCl<sub>3</sub>) of compound **3ab**

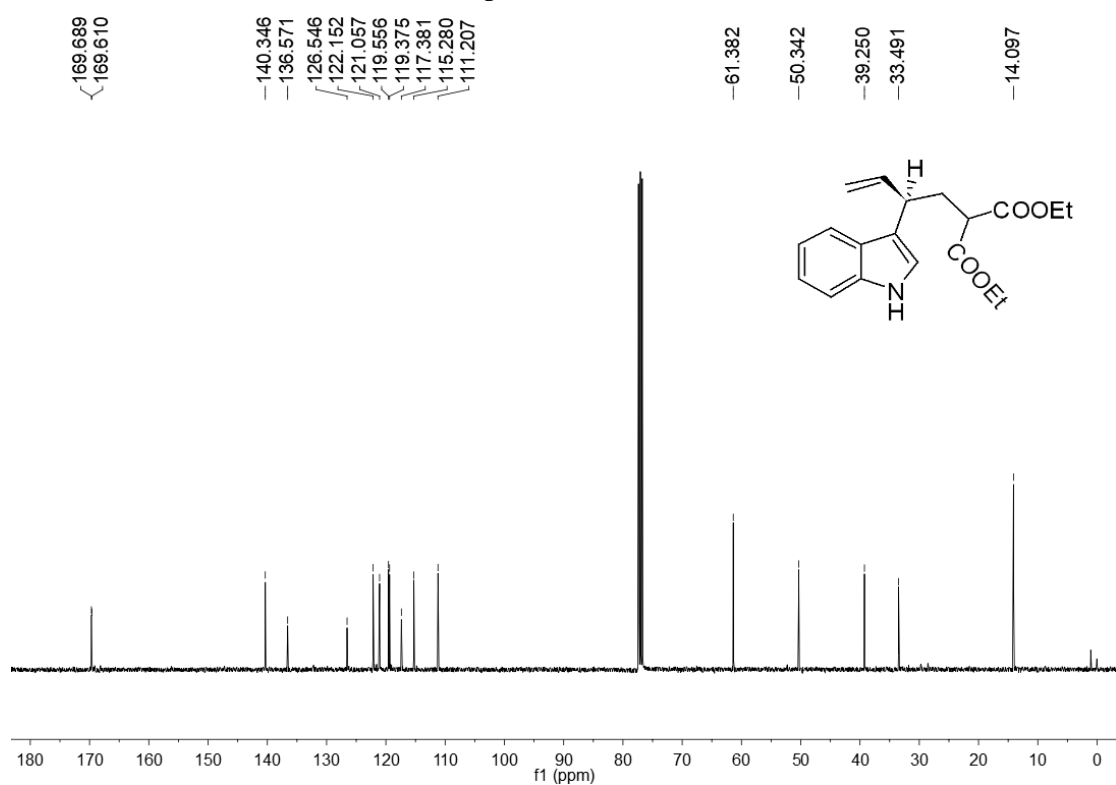

<sup>1</sup>H NMR (400 MHz, CDCl<sub>3</sub>) of compound **3bb**

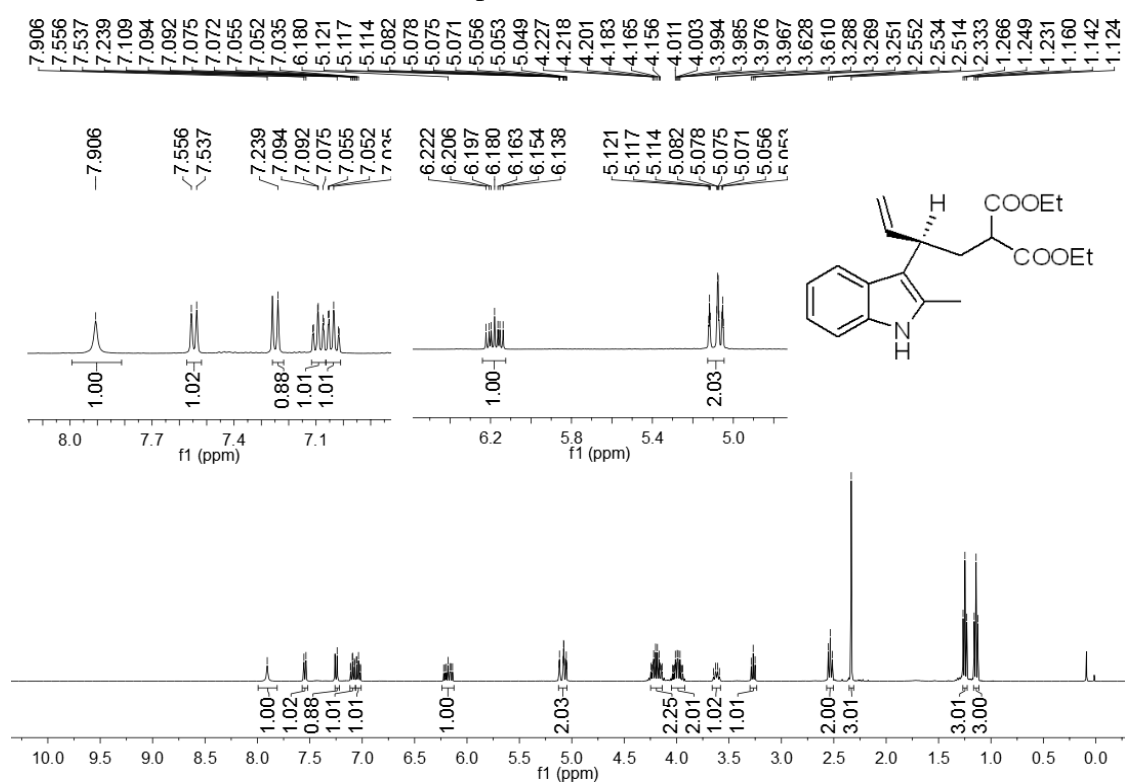

<sup>13</sup>C NMR (100 MHz, CDCl<sub>3</sub>) of compound **3bb**

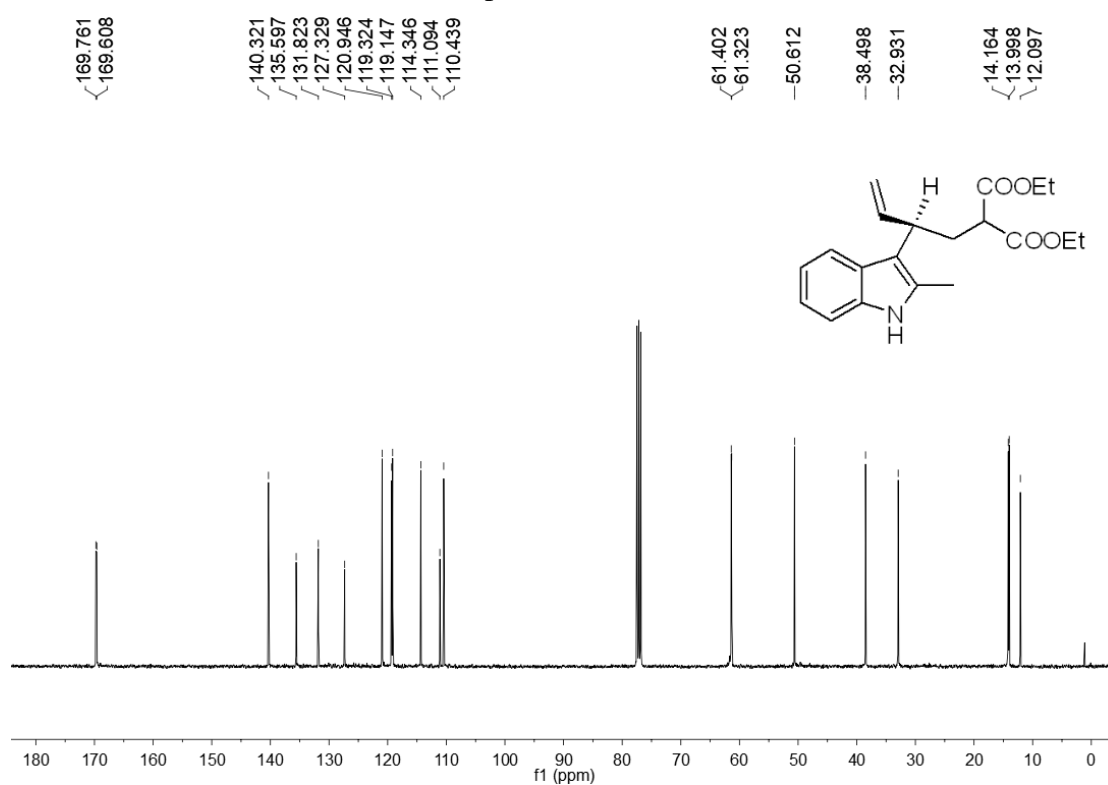

<sup>1</sup>H NMR (400 MHz, CDCl<sub>3</sub>) of compound **3eb**

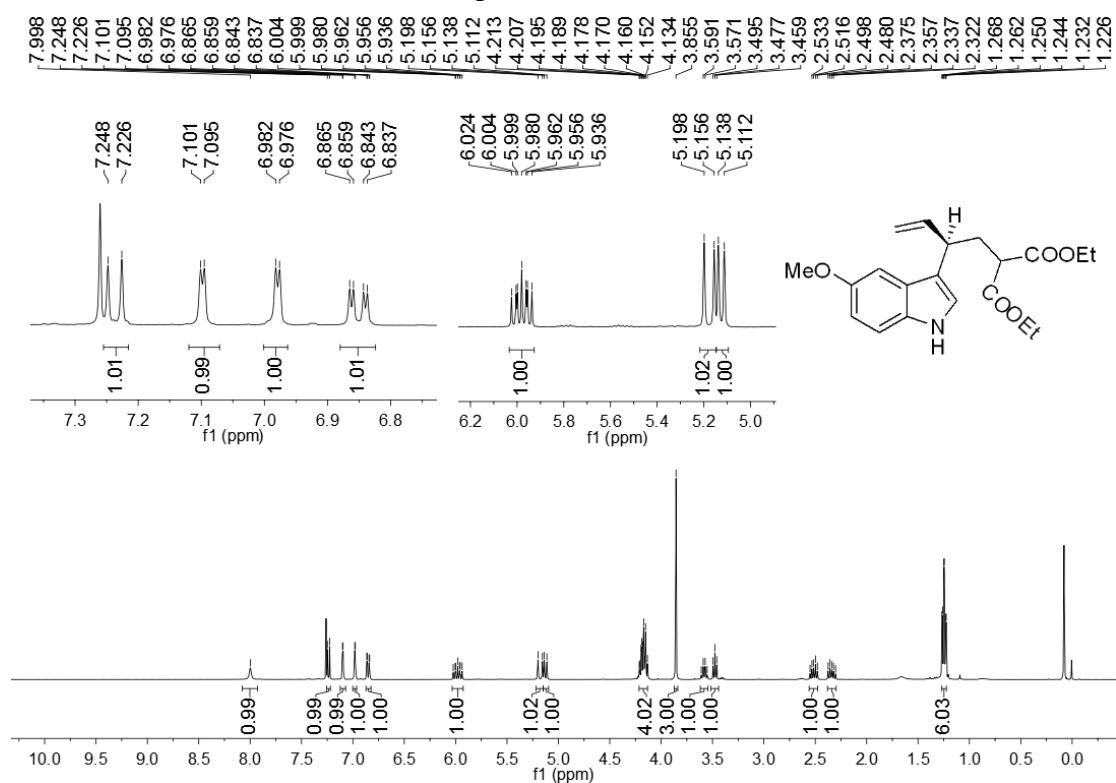

<sup>13</sup>C NMR (100 MHz, CDCl<sub>3</sub>) of compound **3eb**

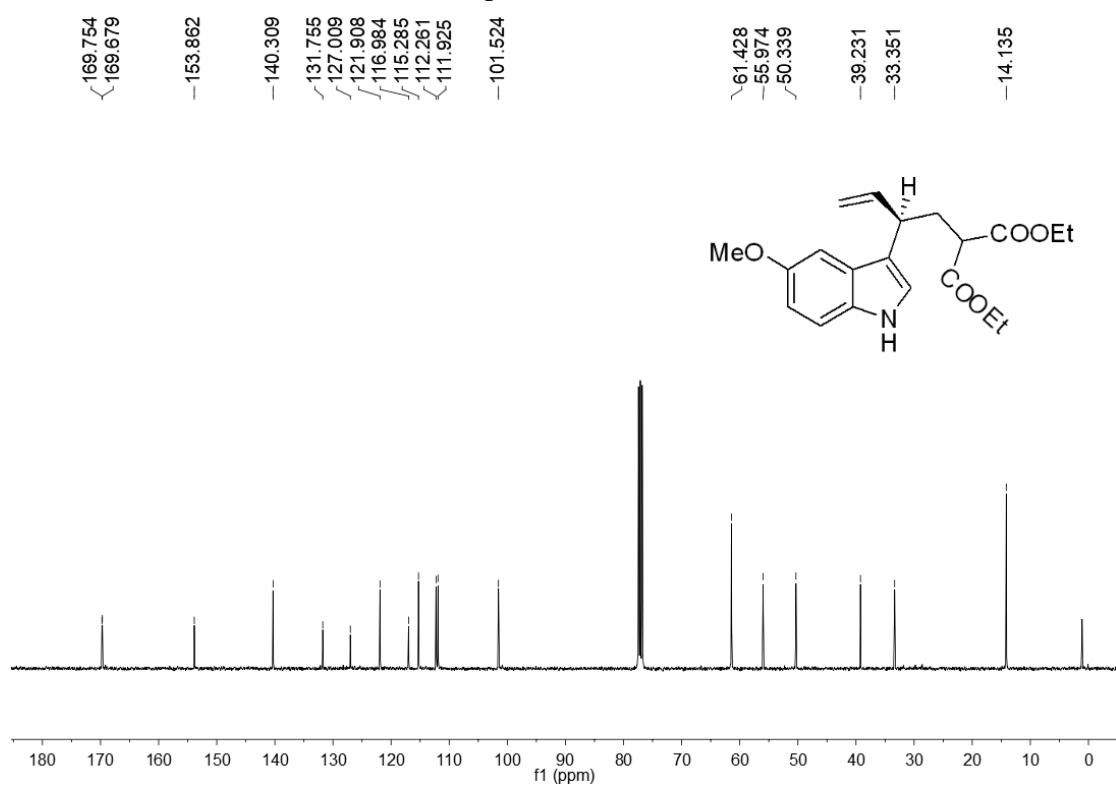

<sup>1</sup>H NMR (400 MHz, CDCl<sub>3</sub>) of compound **3ib**

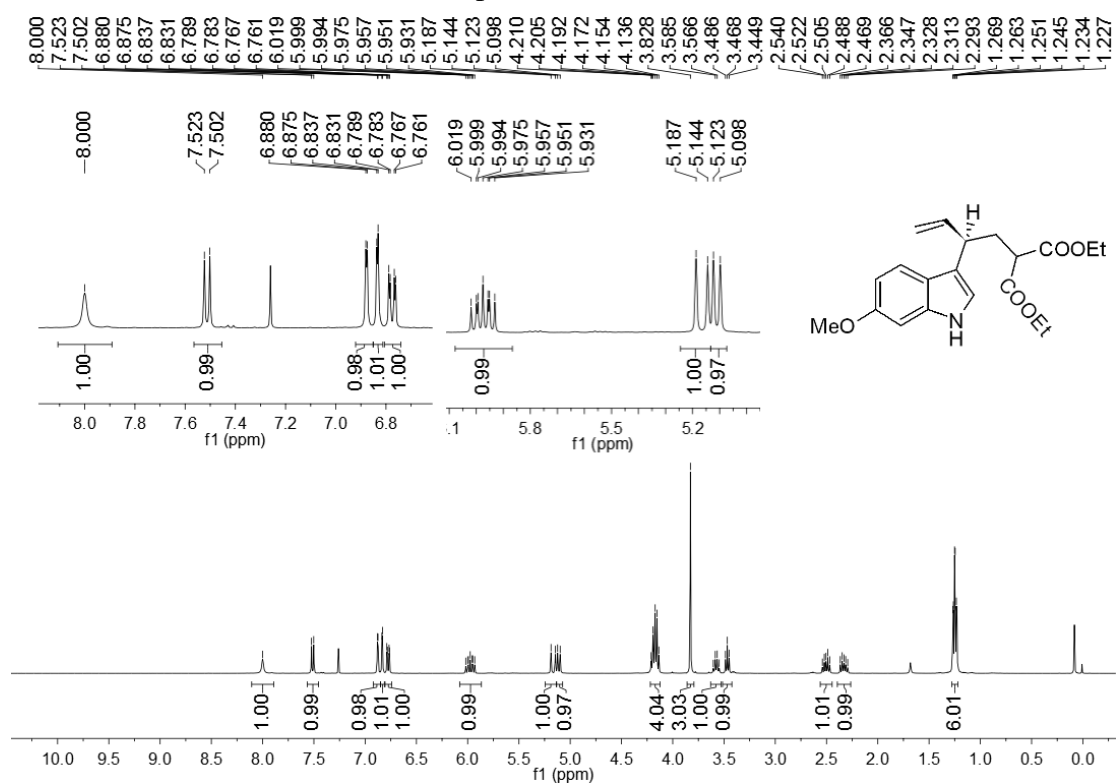

<sup>13</sup>C NMR (100 MHz, CDCl<sub>3</sub>) of compound **3ib**

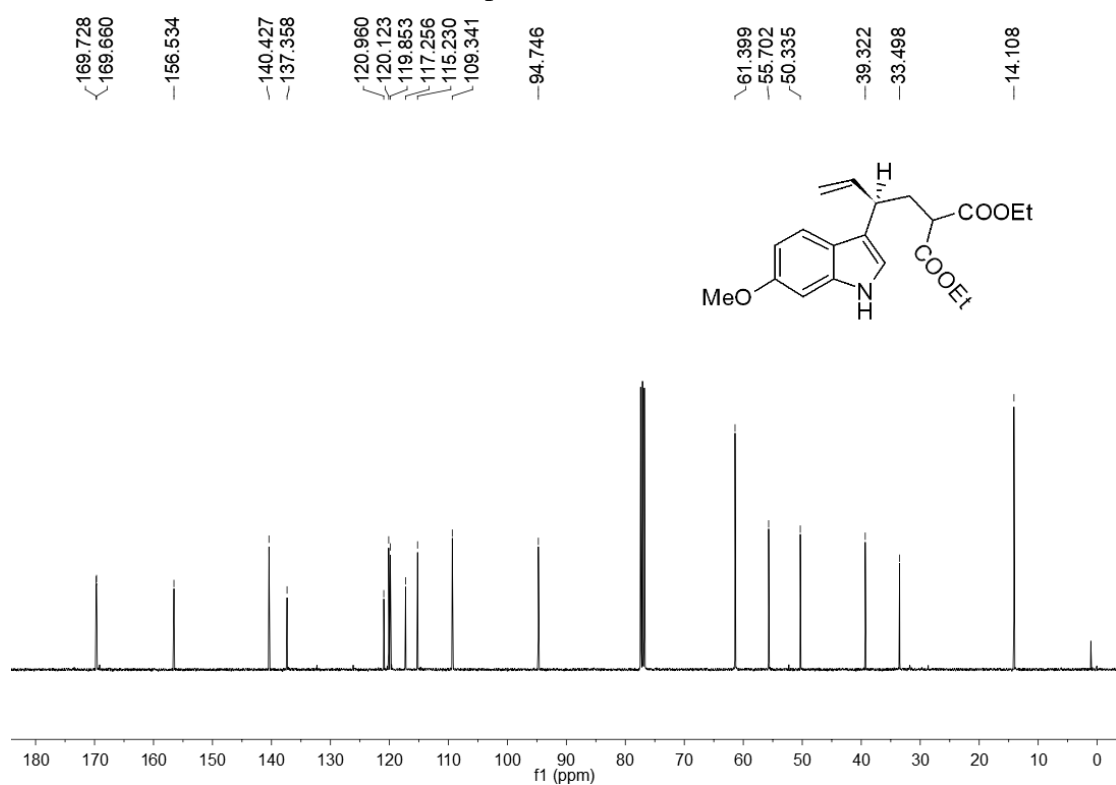

<sup>1</sup>H NMR (400 MHz, CDCl<sub>3</sub>) of compound **3jb**

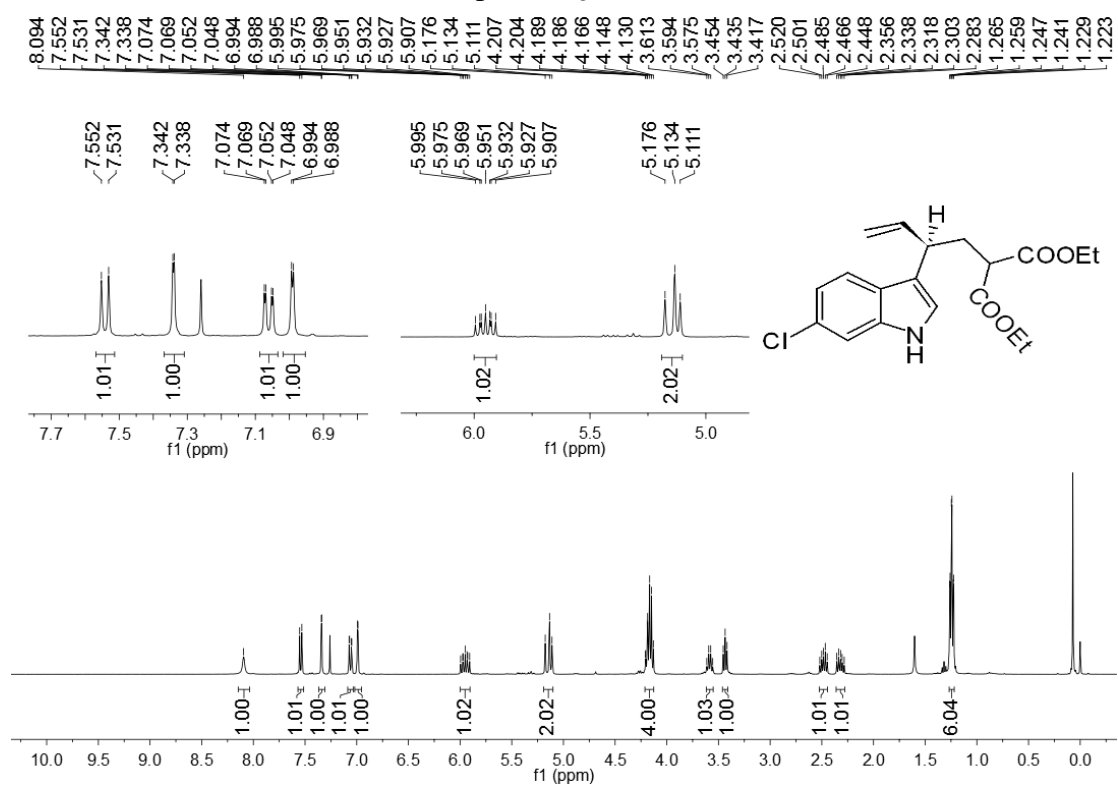

<sup>13</sup>C NMR (100 MHz, CDCl<sub>3</sub>) of compound **3jb**

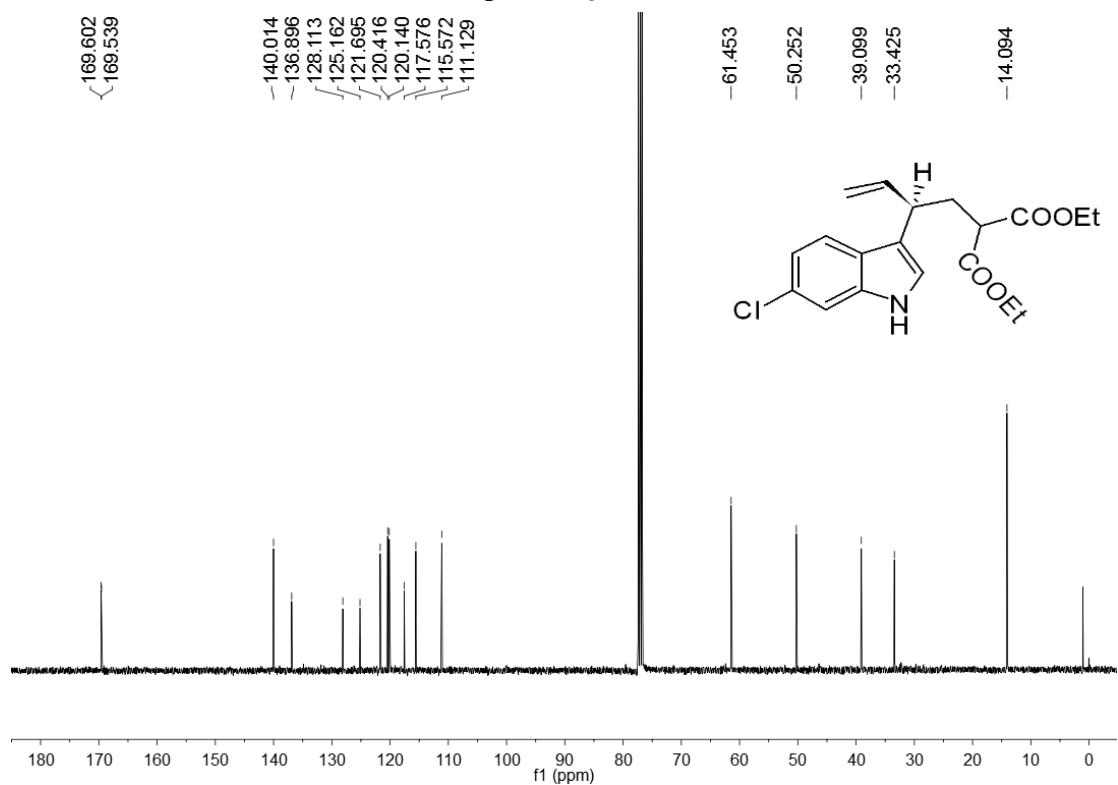



<sup>1</sup>H NMR (400 MHz, CDCl<sub>3</sub>) of compound **31b**

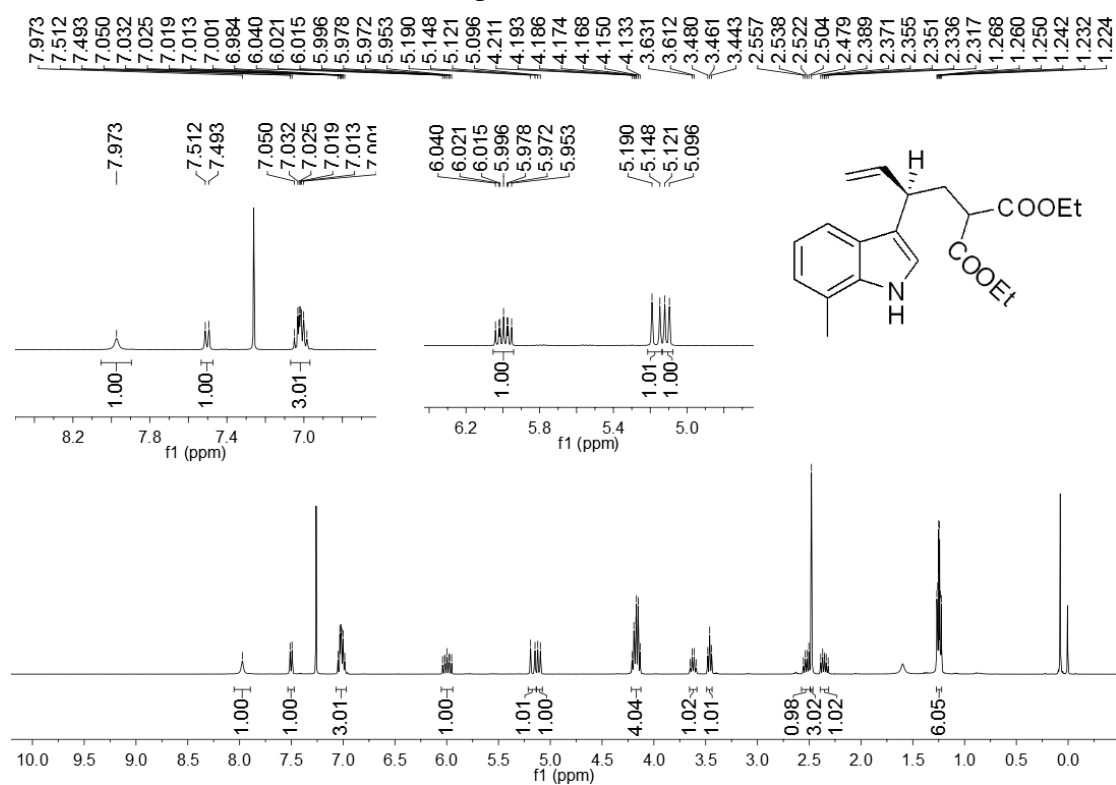

<sup>13</sup>C NMR (100 MHz, CDCl<sub>3</sub>) of compound **31b**

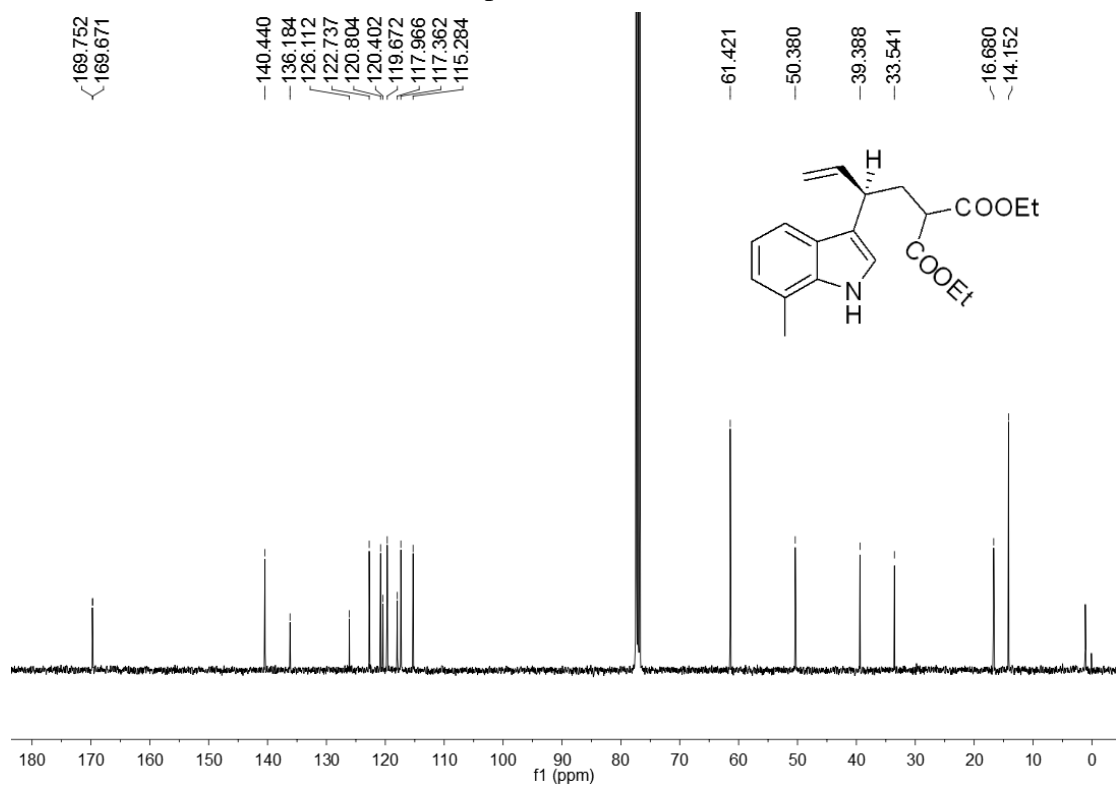



<sup>1</sup>H NMR (400 MHz, CDCl<sub>3</sub>) of compound **3qb**

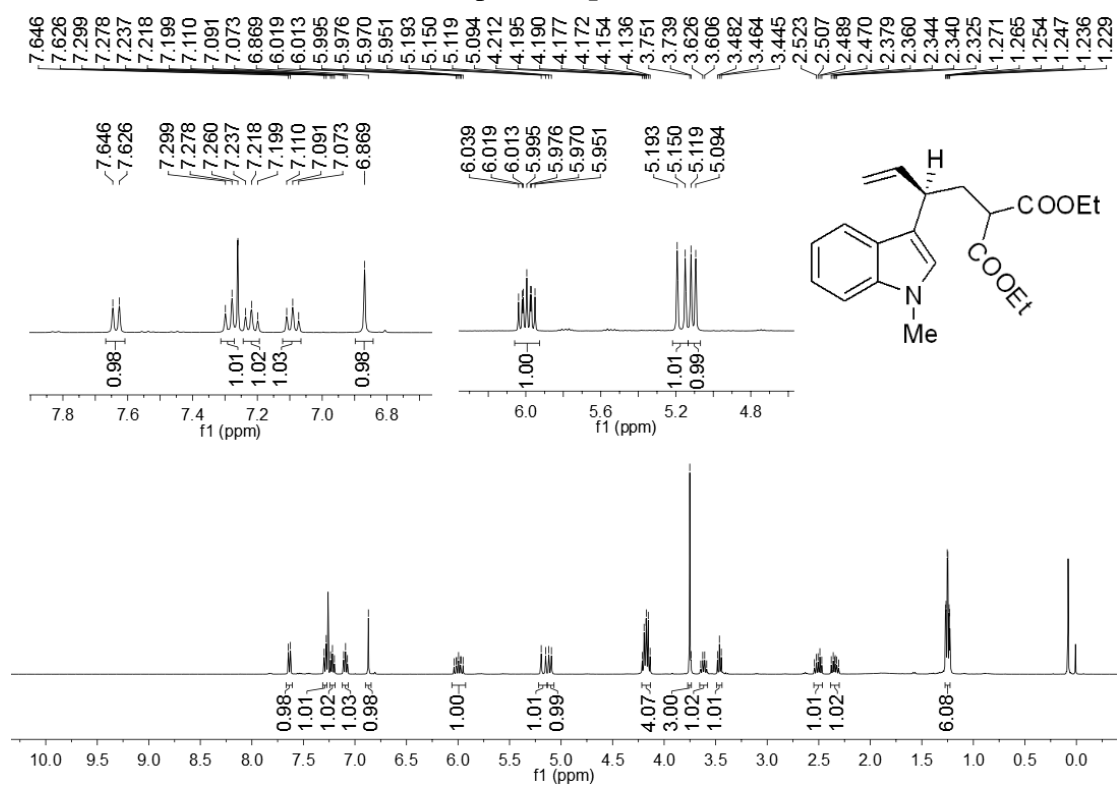

<sup>13</sup>C NMR (100 MHz, CDCl<sub>3</sub>) of compound **3qb**

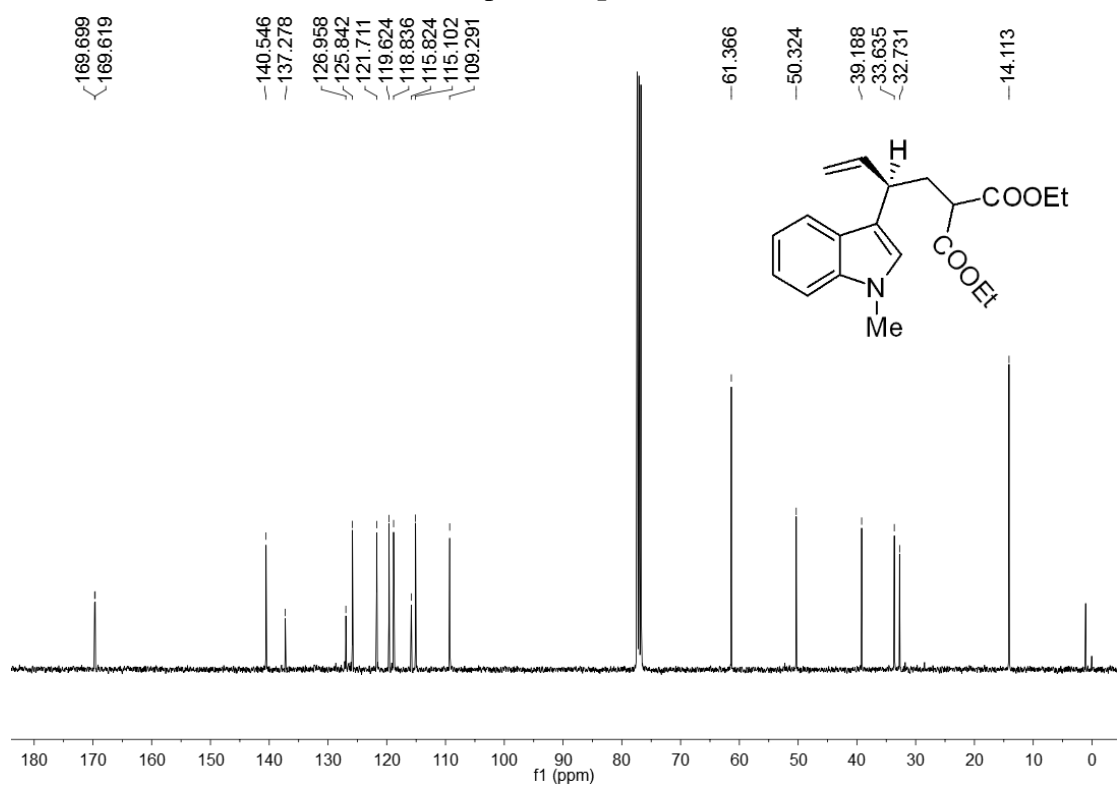

<sup>1</sup>H NMR (400 MHz, CD<sub>3</sub>OD) of compound **5**

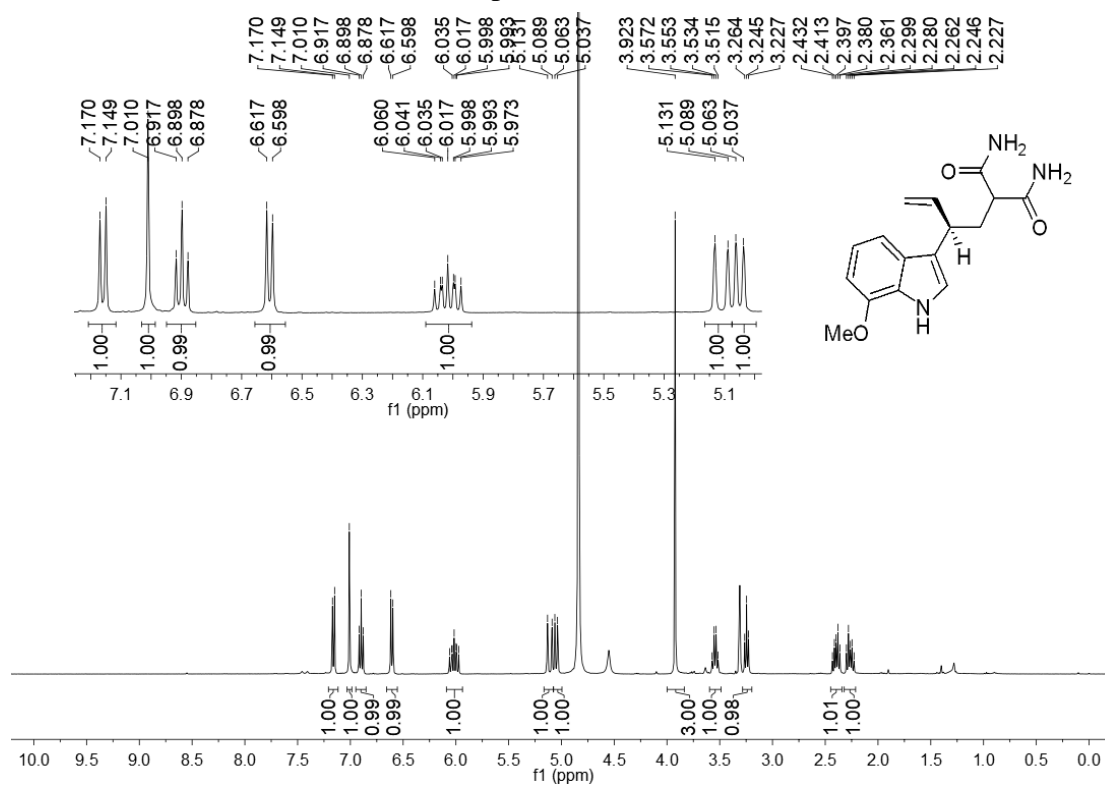

<sup>13</sup>C NMR (100 MHz, CD<sub>3</sub>OD) of compound **5**

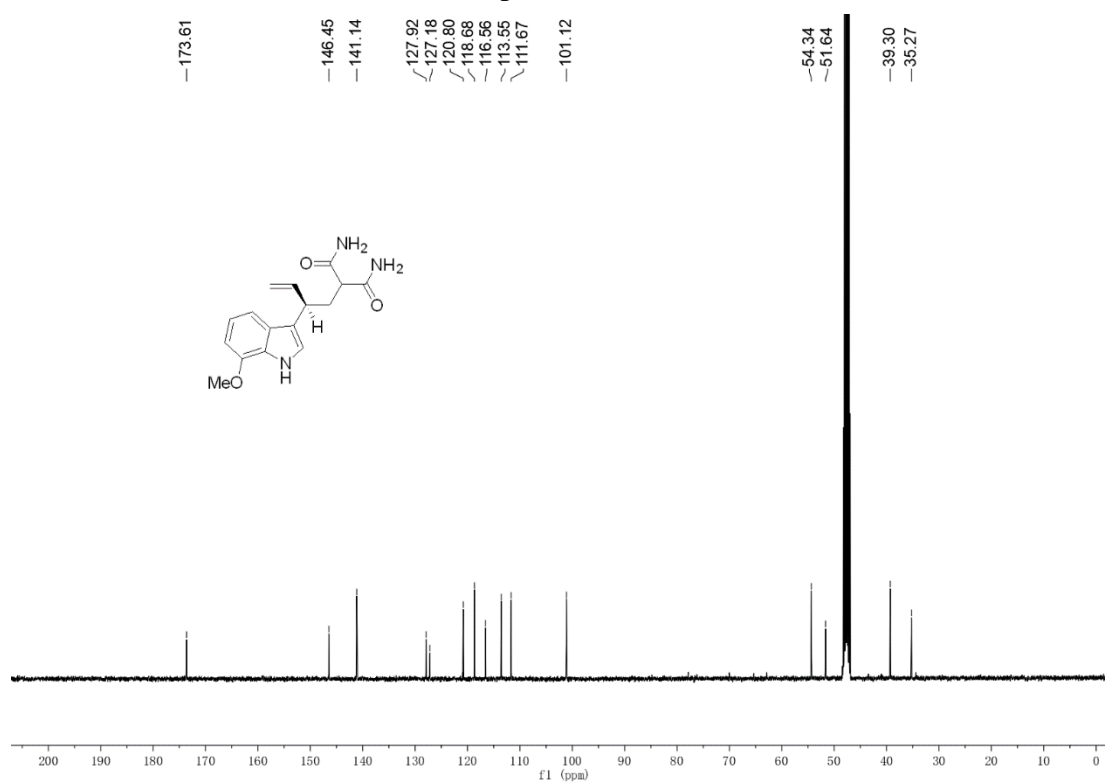

$^1\text{H}$  NMR (400 MHz,  $\text{CDCl}_3$ ) of compound **6**

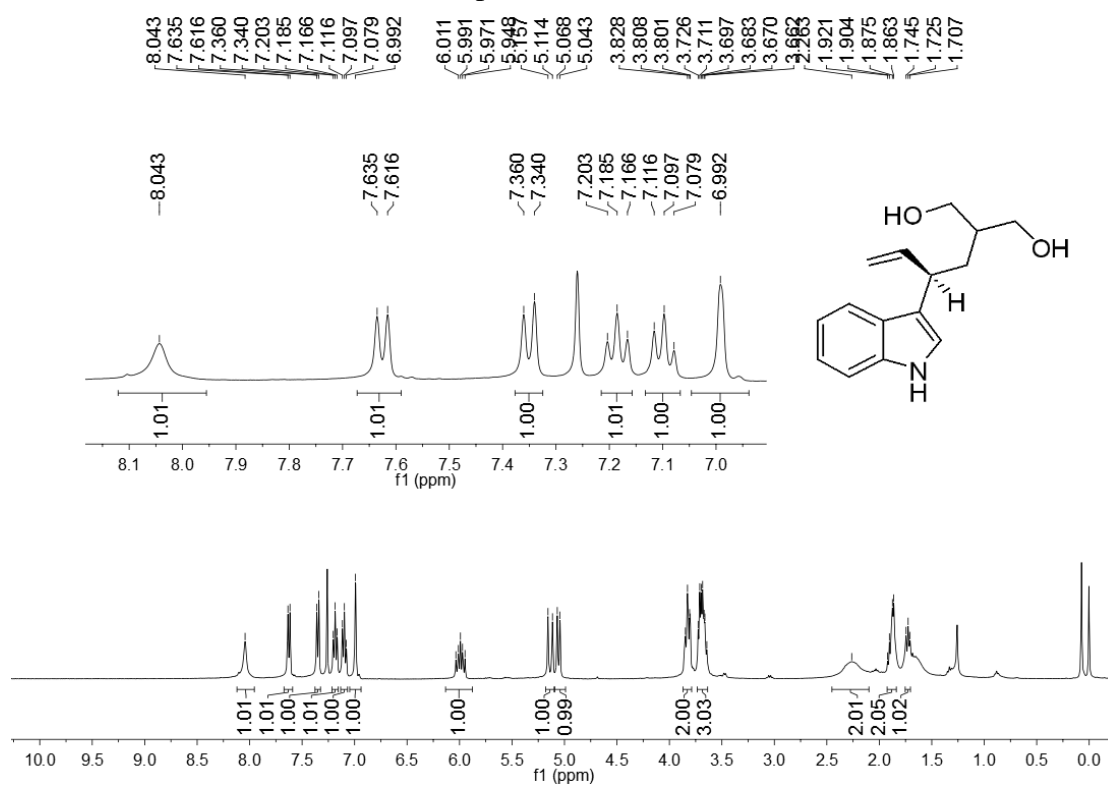

$^{13}\text{C}$  NMR (100 MHz,  $\text{CDCl}_3$ ) of compound **6**

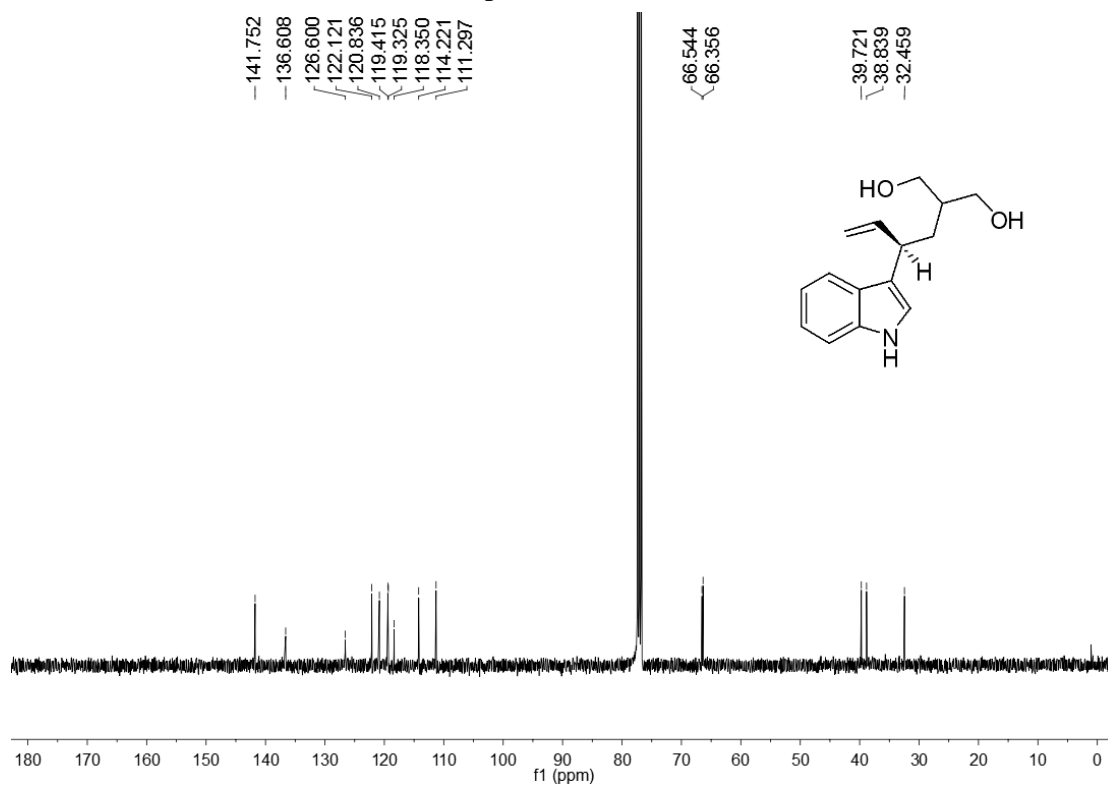

## 2. HPLC spectra of product 3 and 5-6

### 3aa Racemic

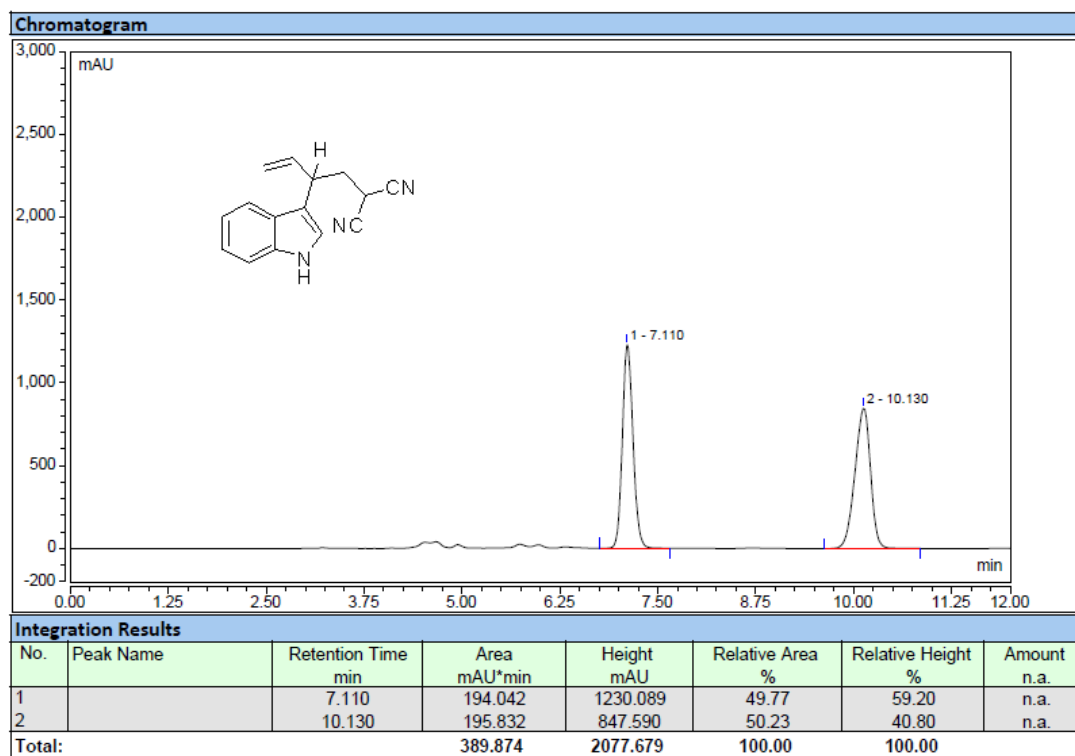

### Enantioselective

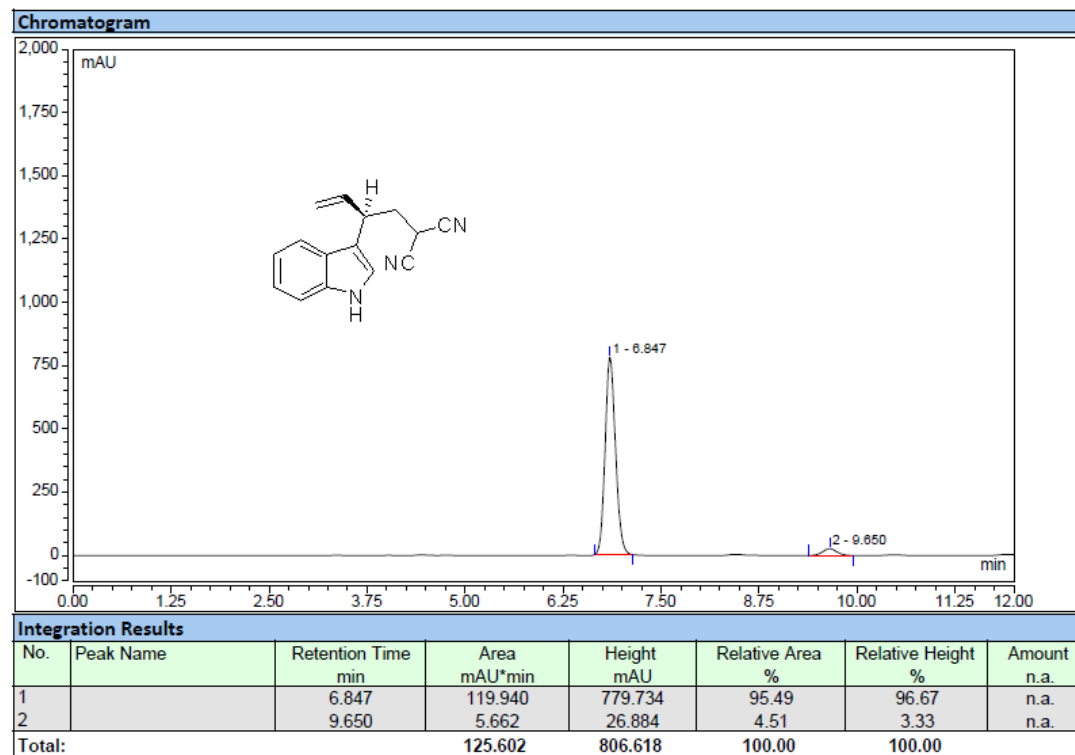

### 3ba Racemic

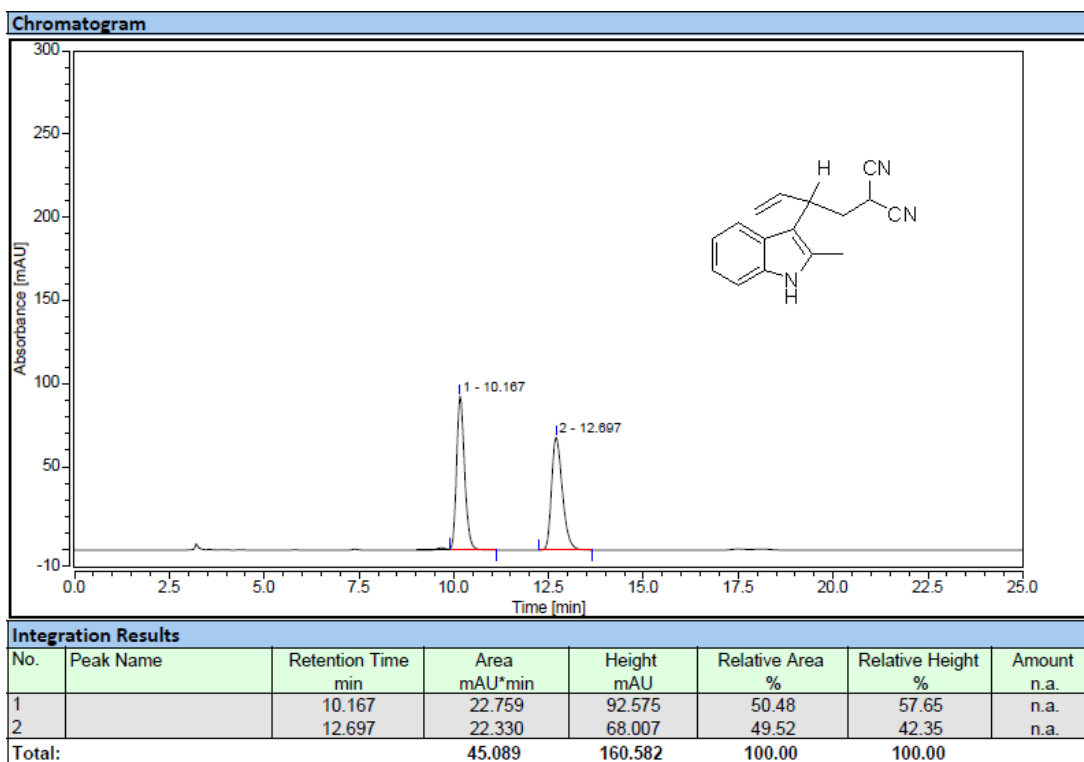

### Enantioselective

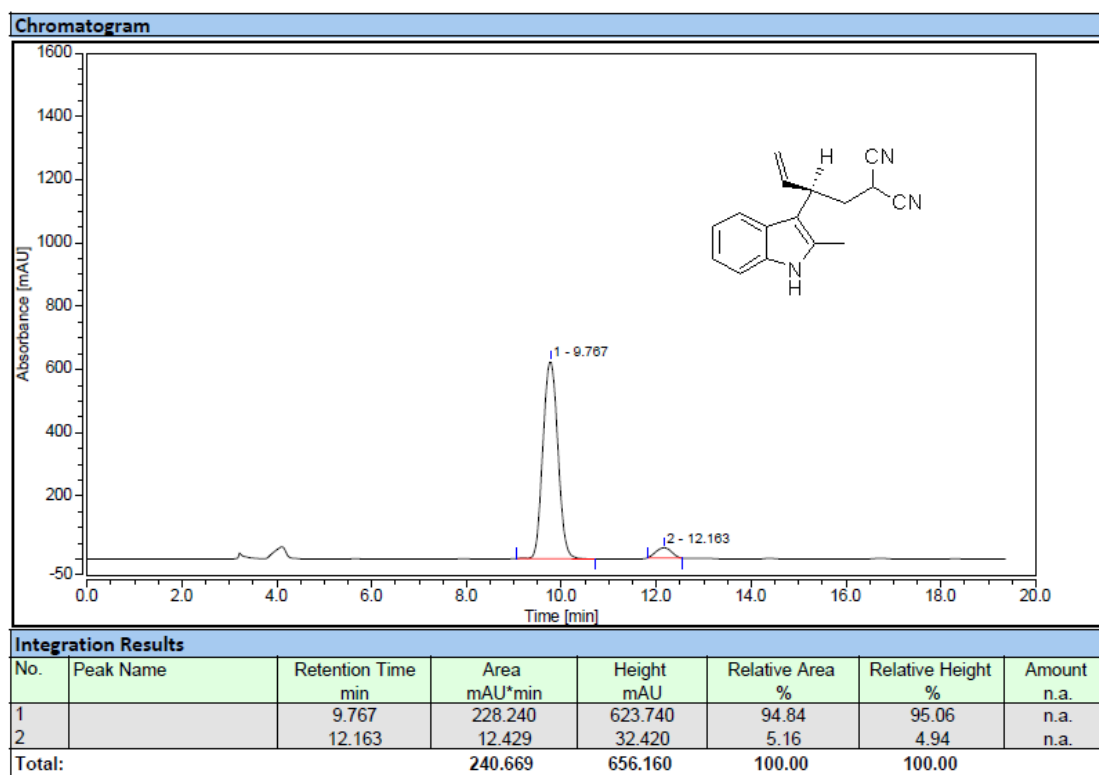

### 3ca Racemic

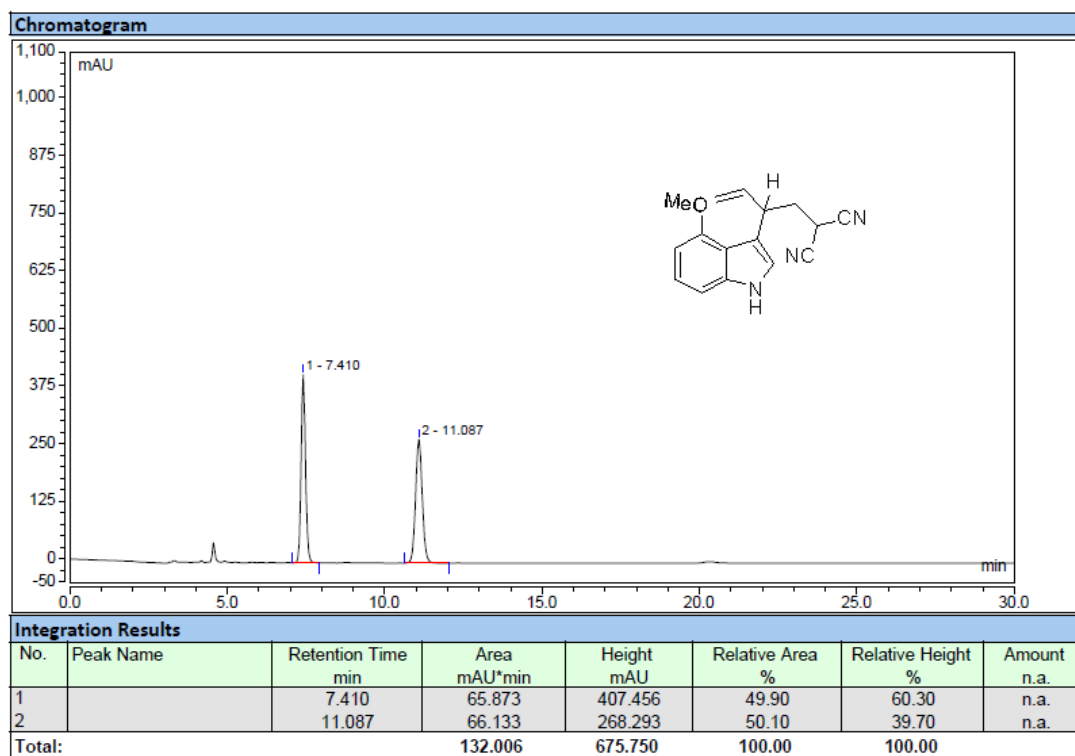

### Enantioselective

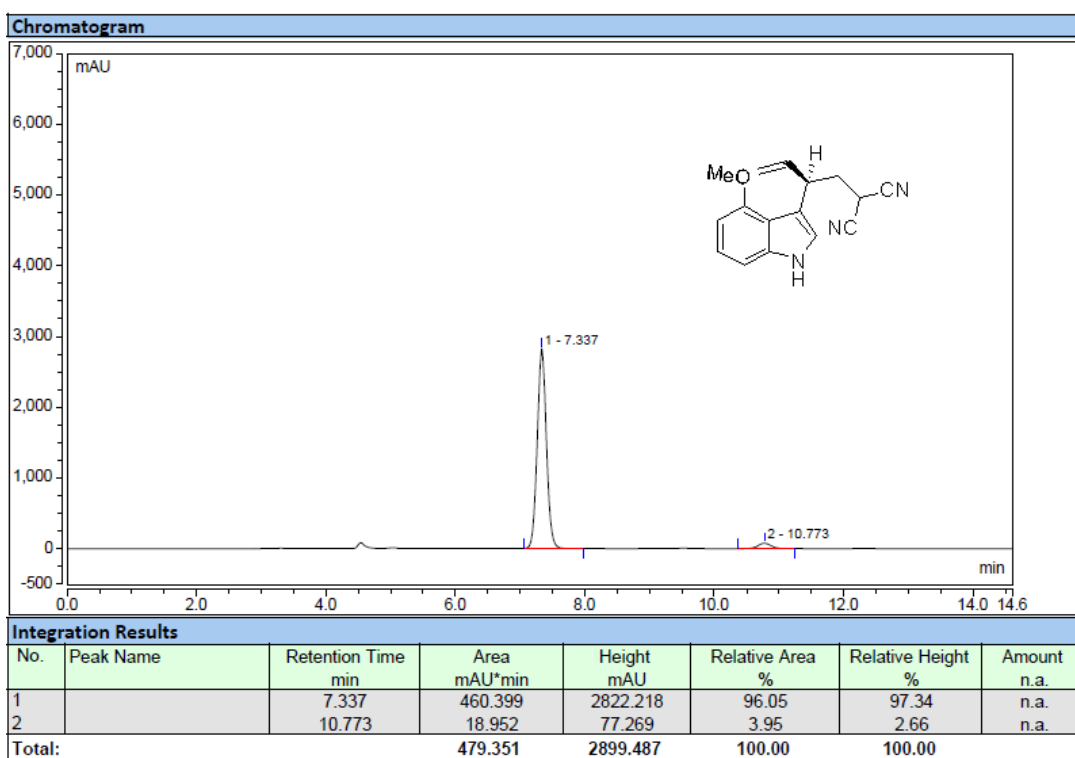



### 3da Racemic

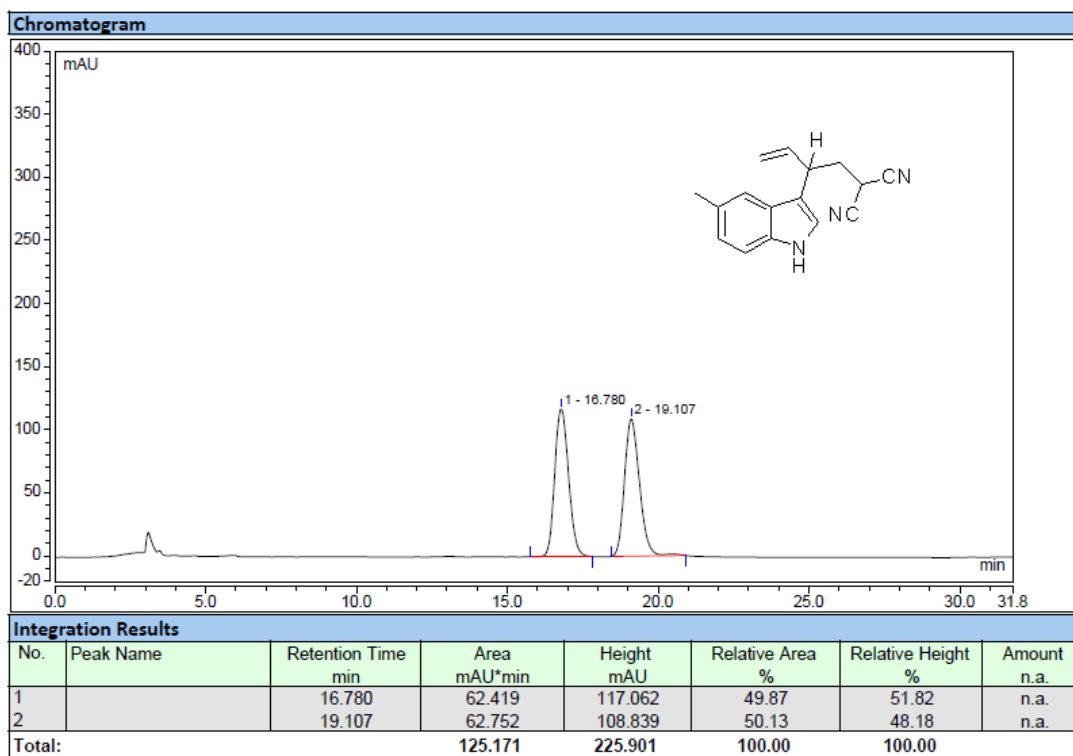

### Enantioselective

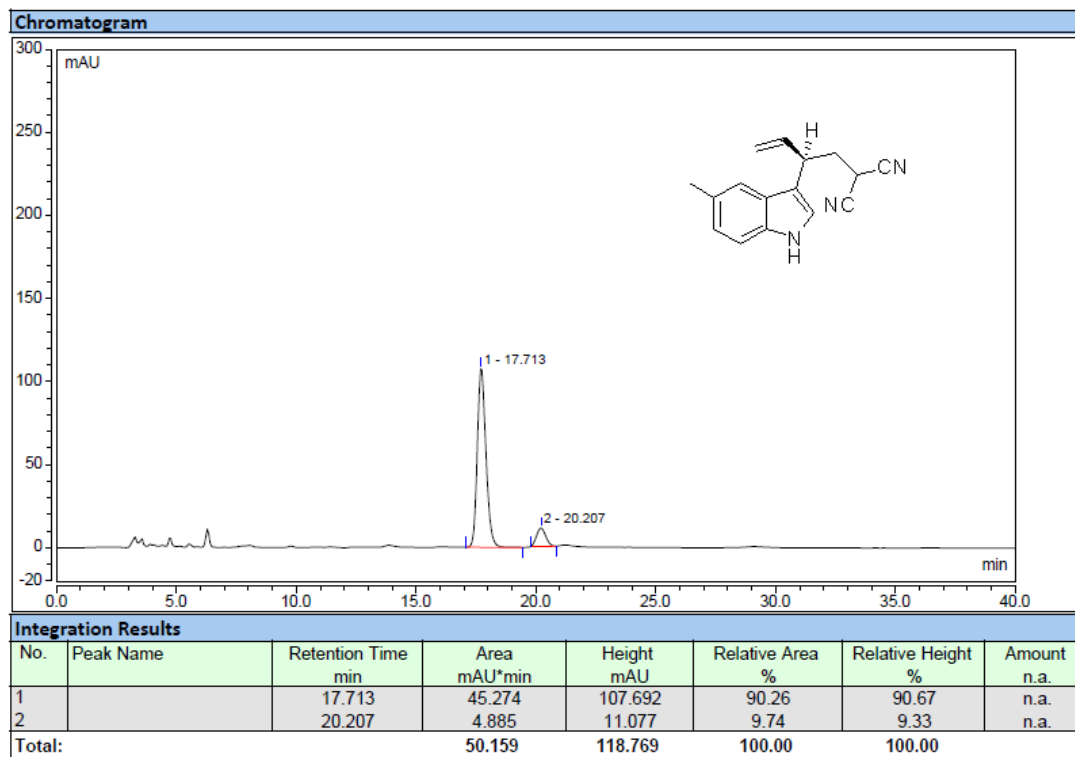

### 3ea Racemic

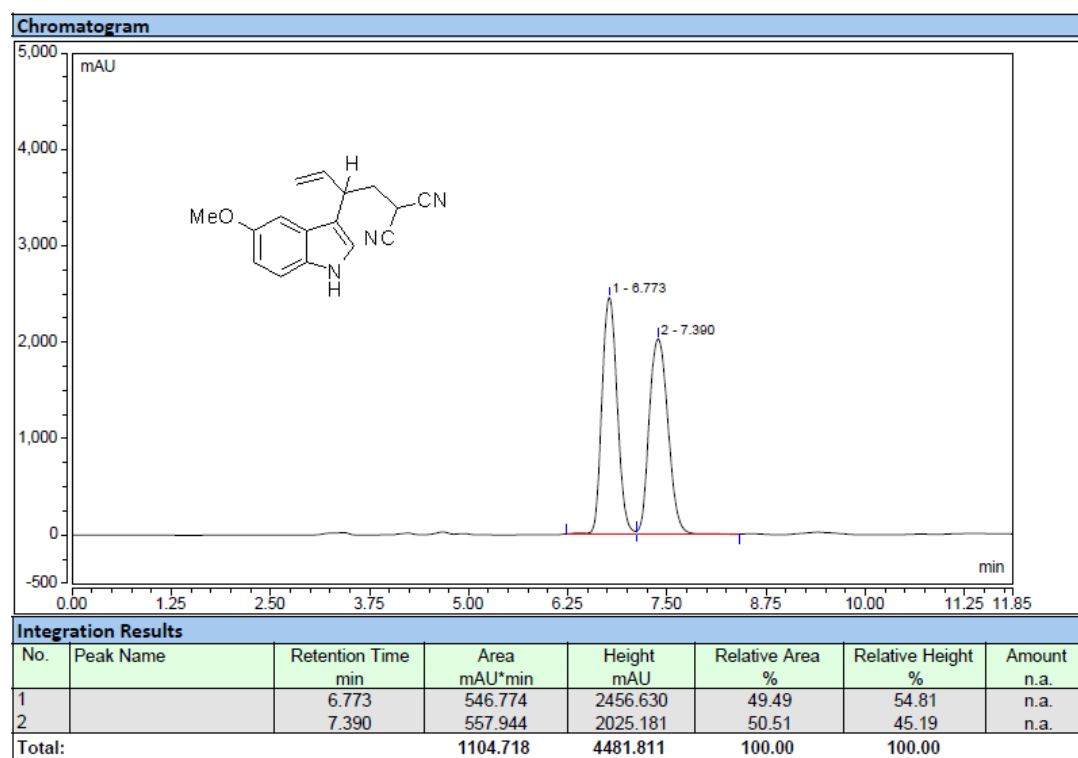

### Enantioselective

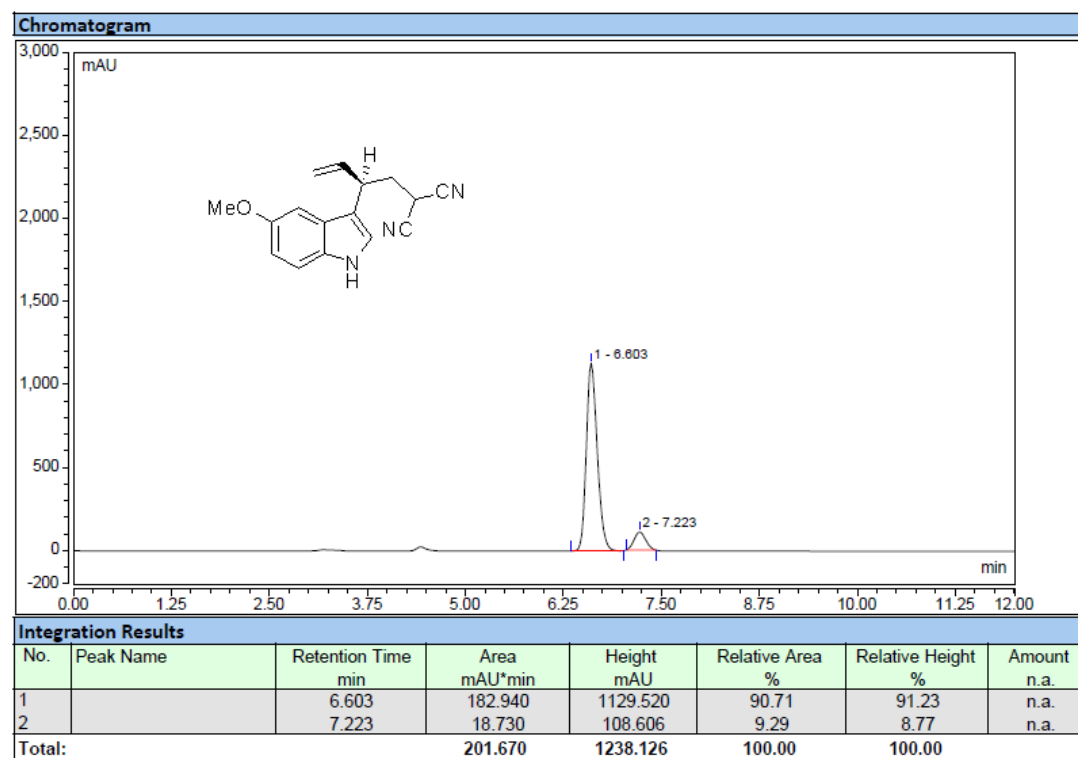

### 3fa Racemic

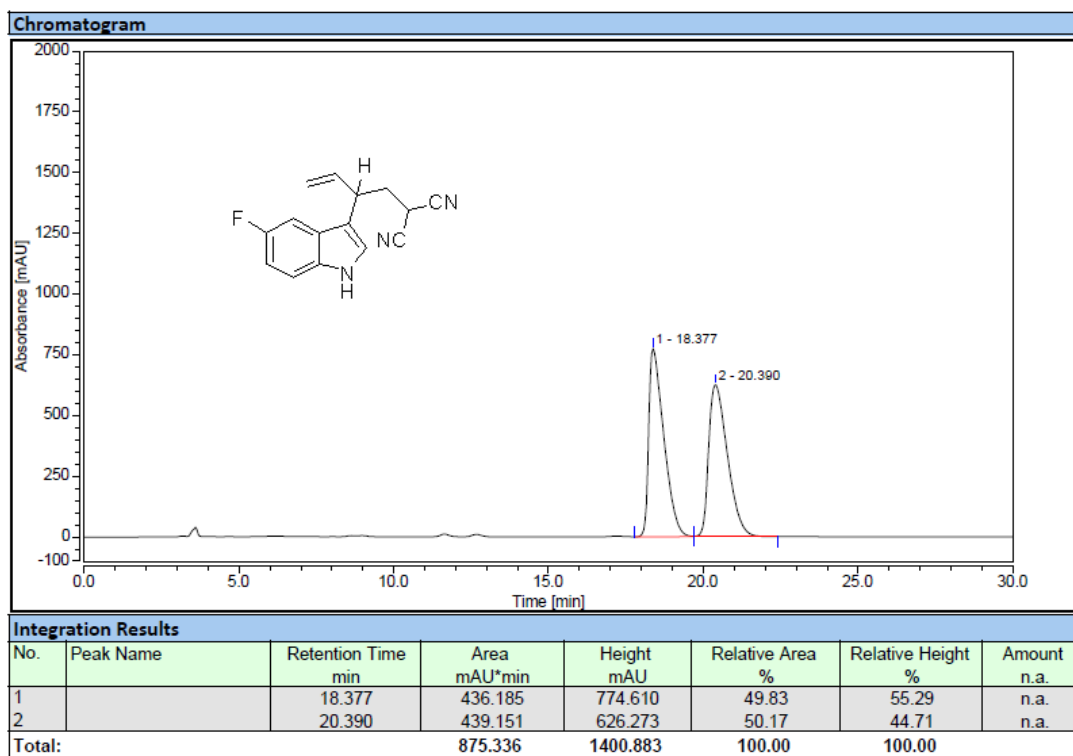

### Enantioselective

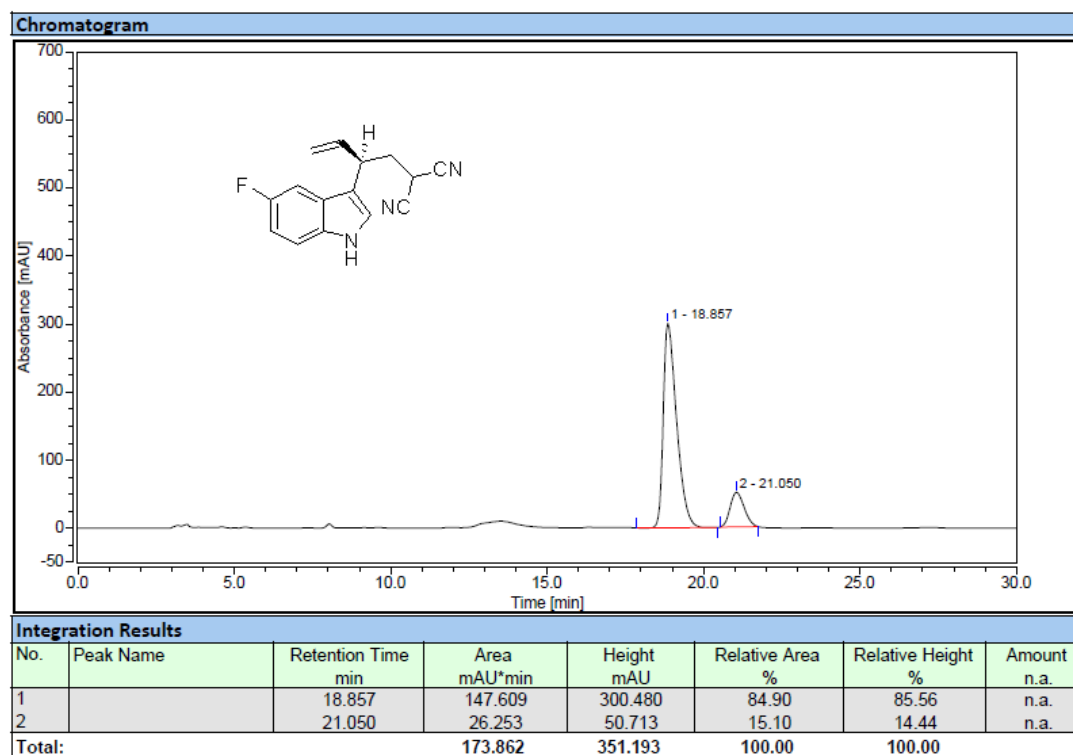

### 3ga Racemic

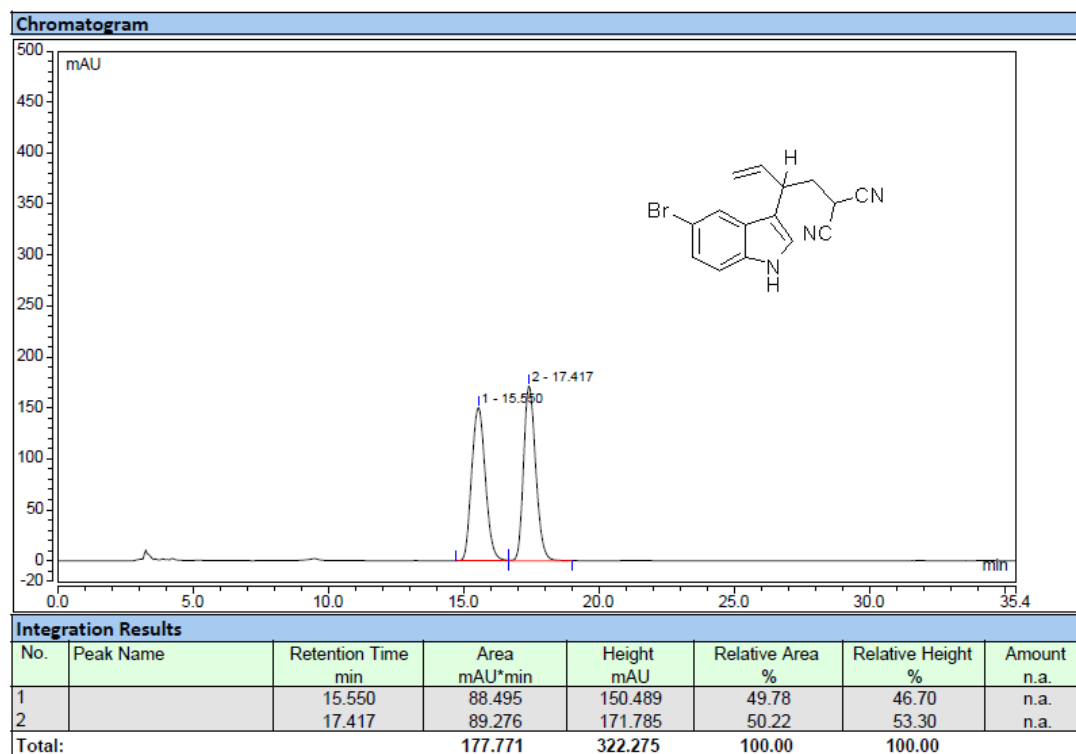

### Enantioselective

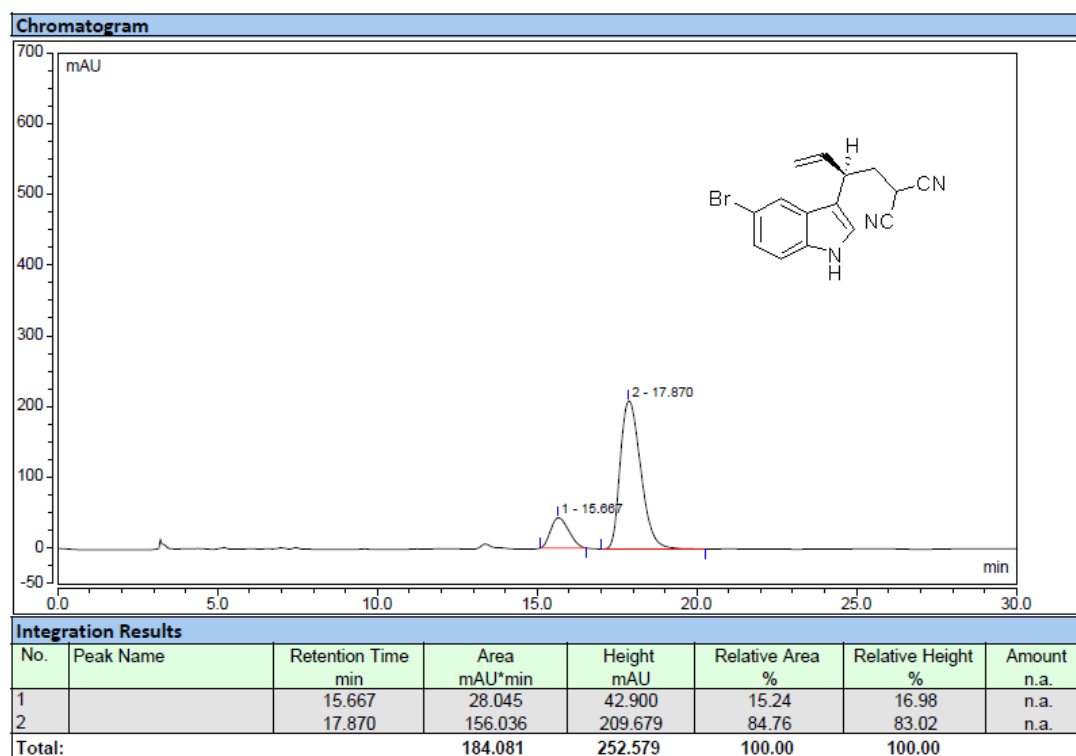

### 3ha Racemic

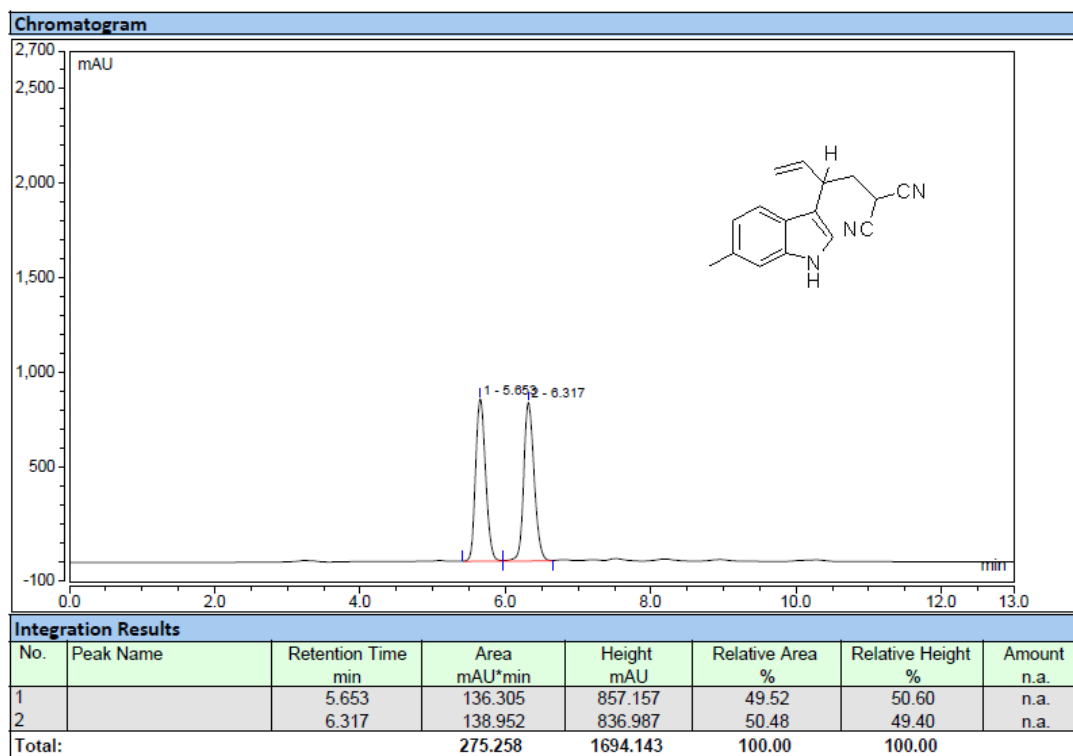

### Enantioselective

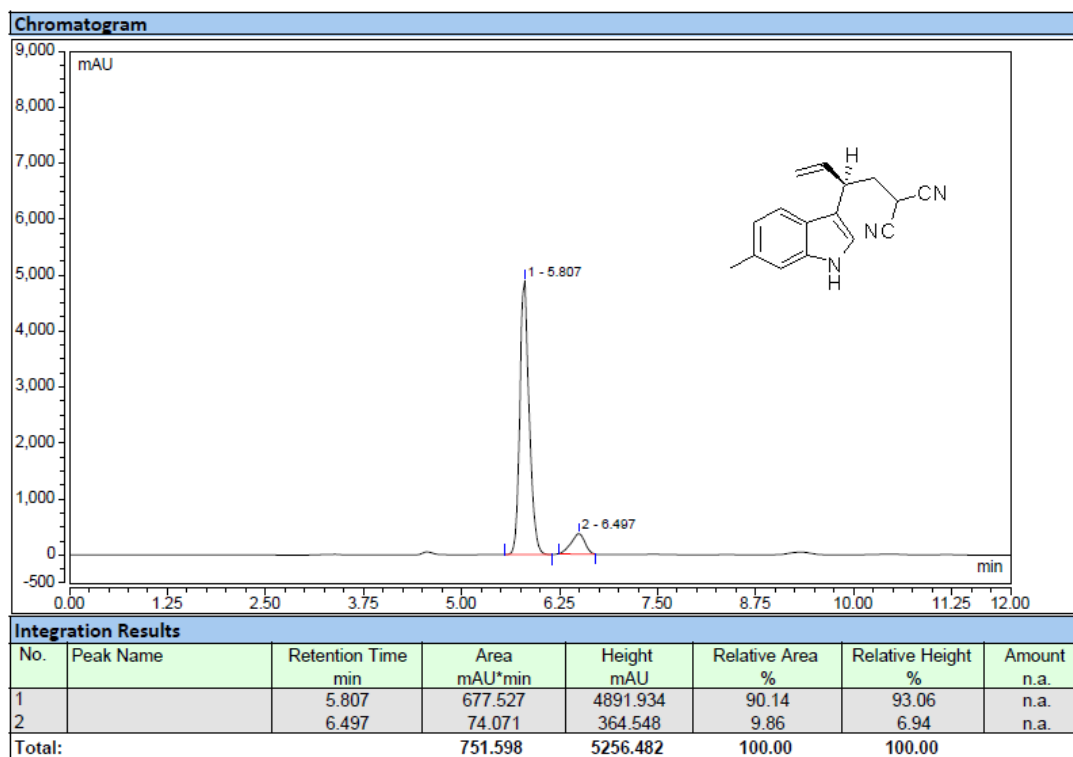

### 3ia Racemic

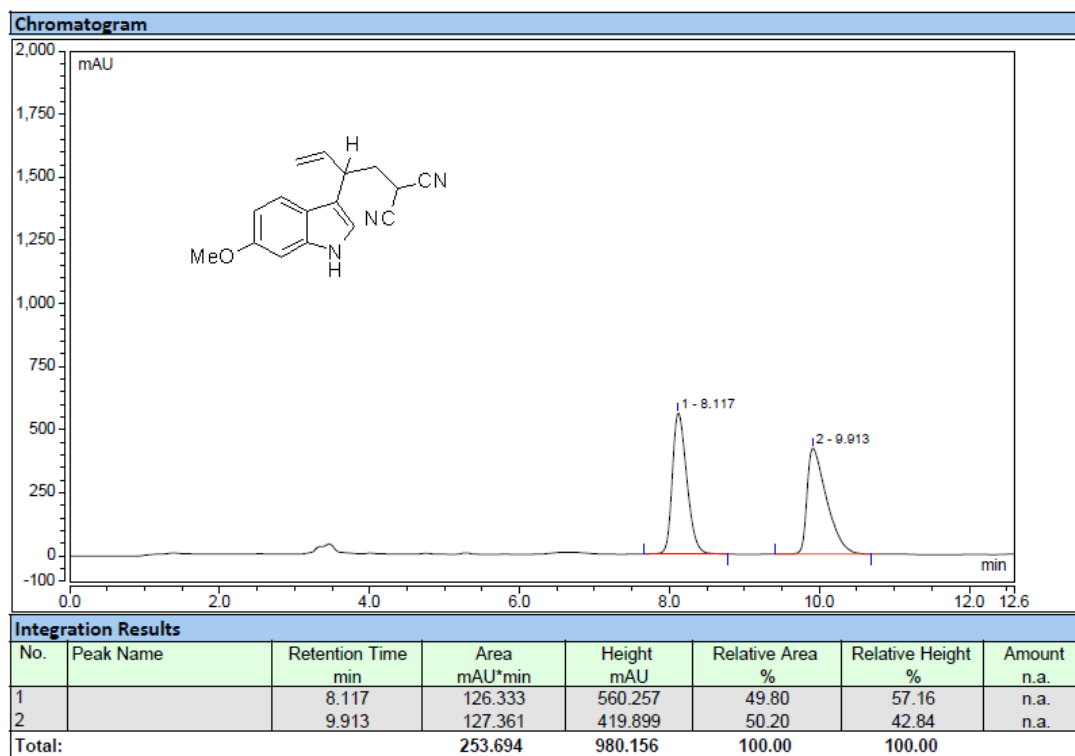

### Enantioselective

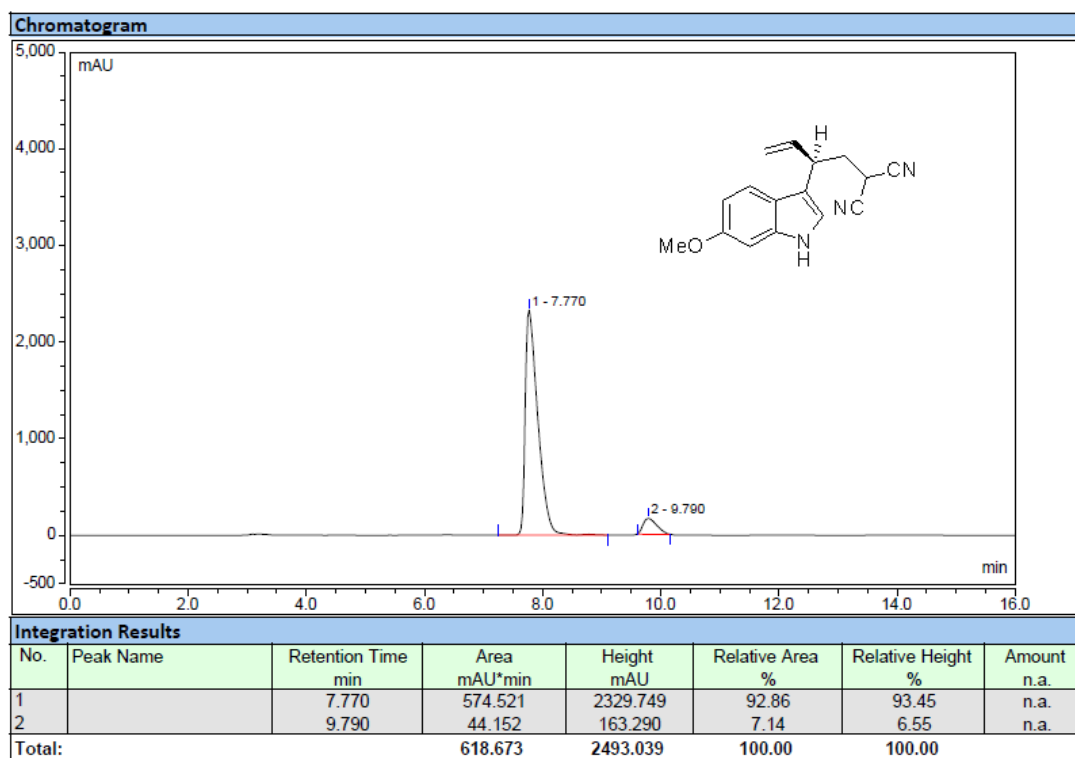

### 3ja Racemic

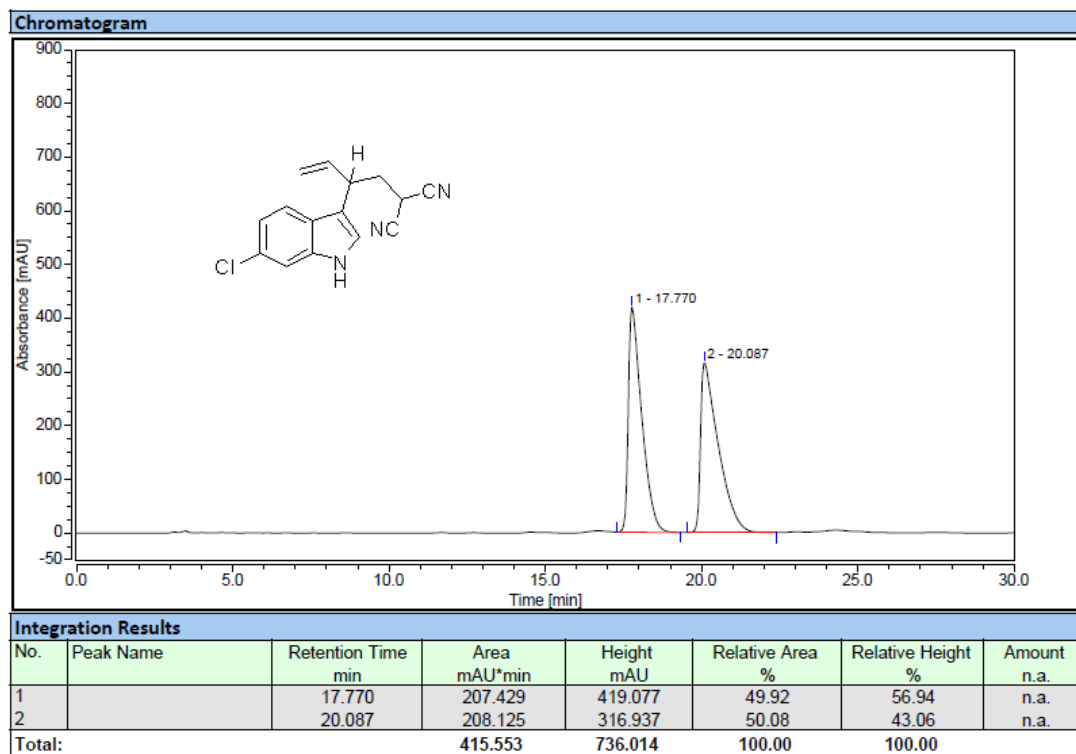

### Enantioselective

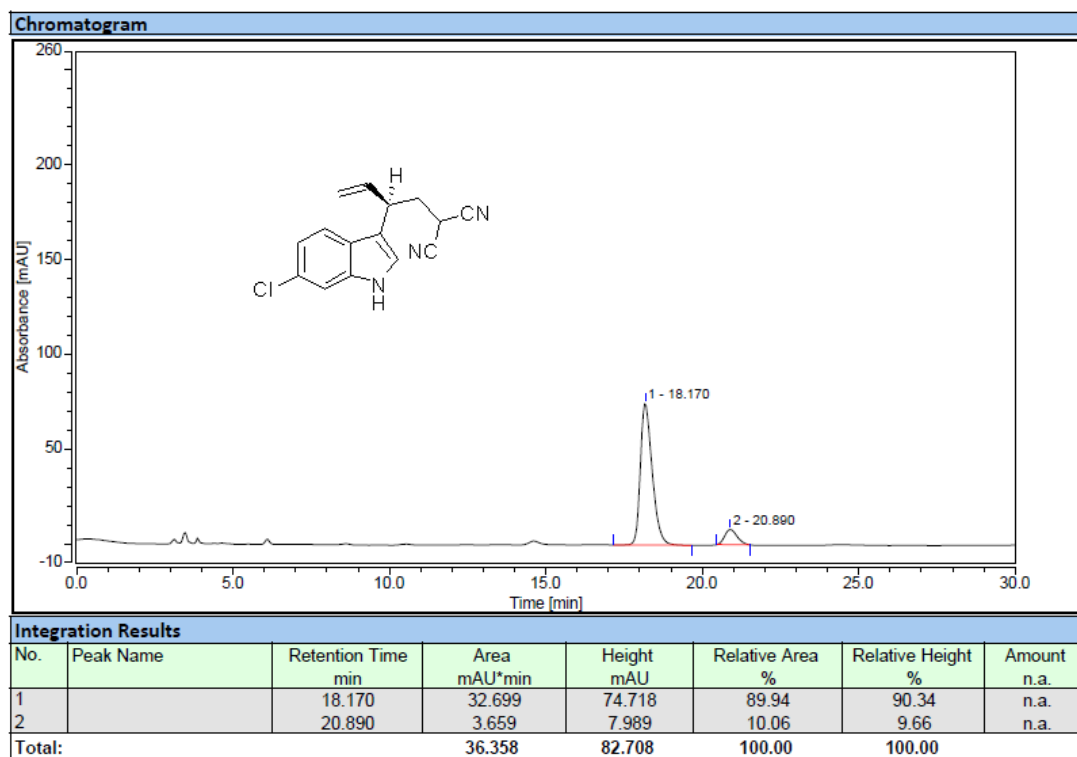

### 3ka Racemic

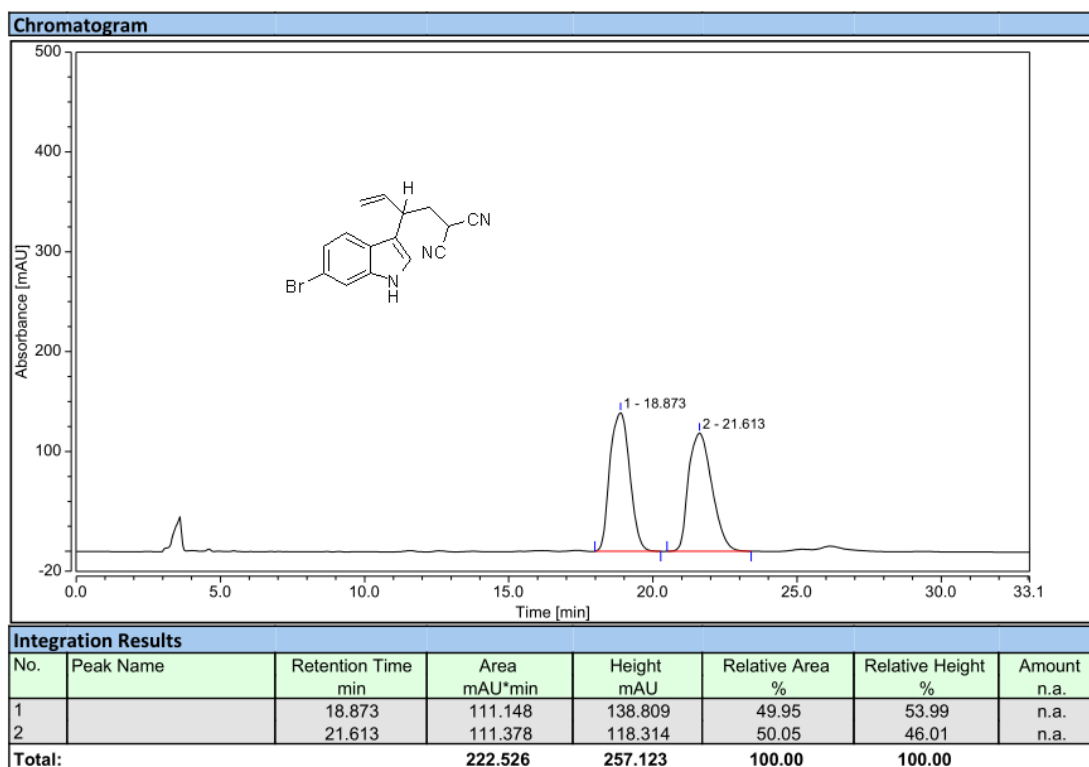

### Enantioselective

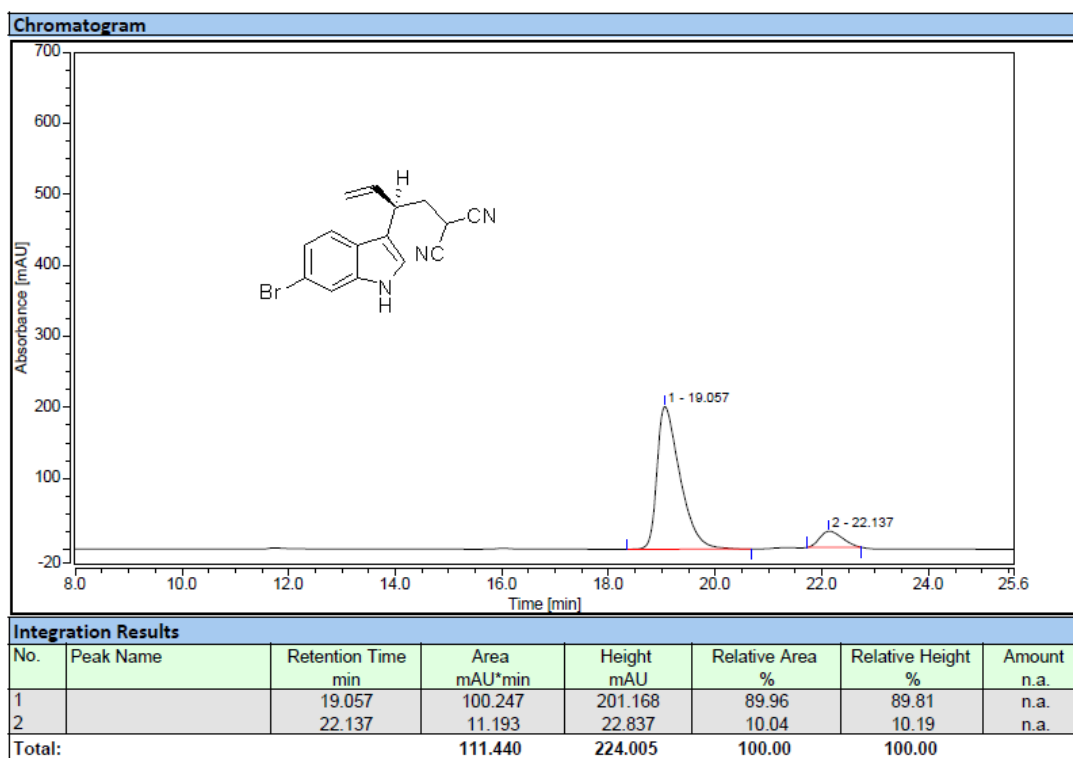



### 3la Racemic

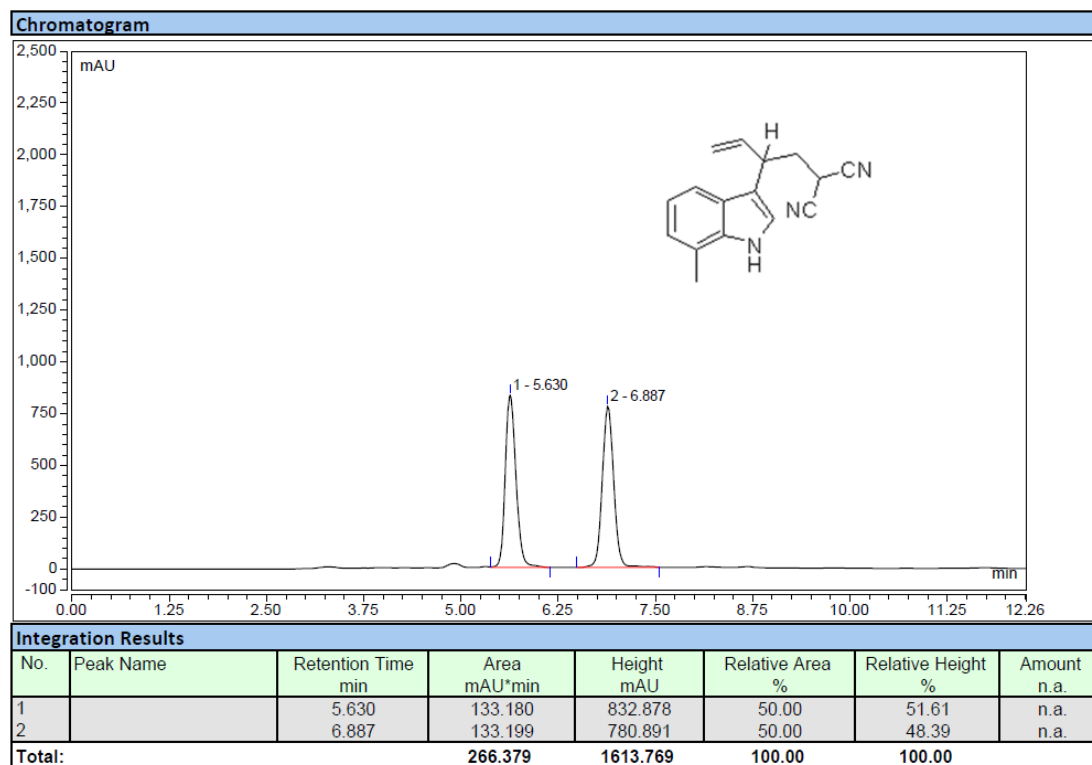

### Enantioselective

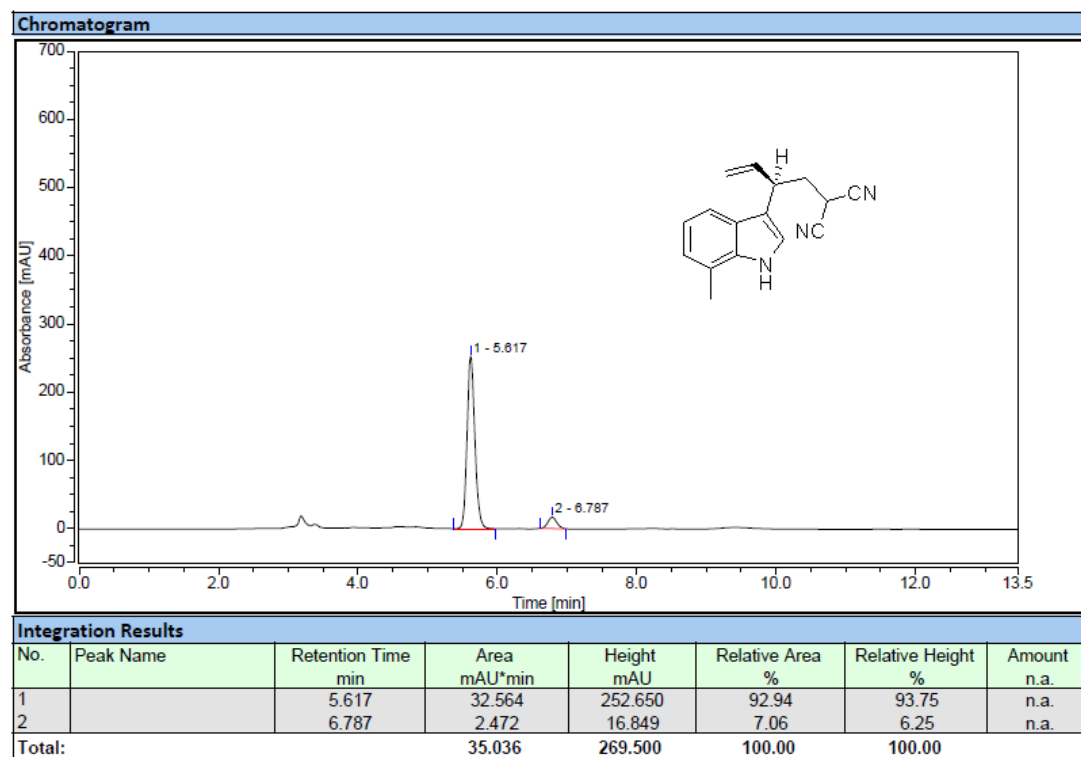

### 3ma Racemic

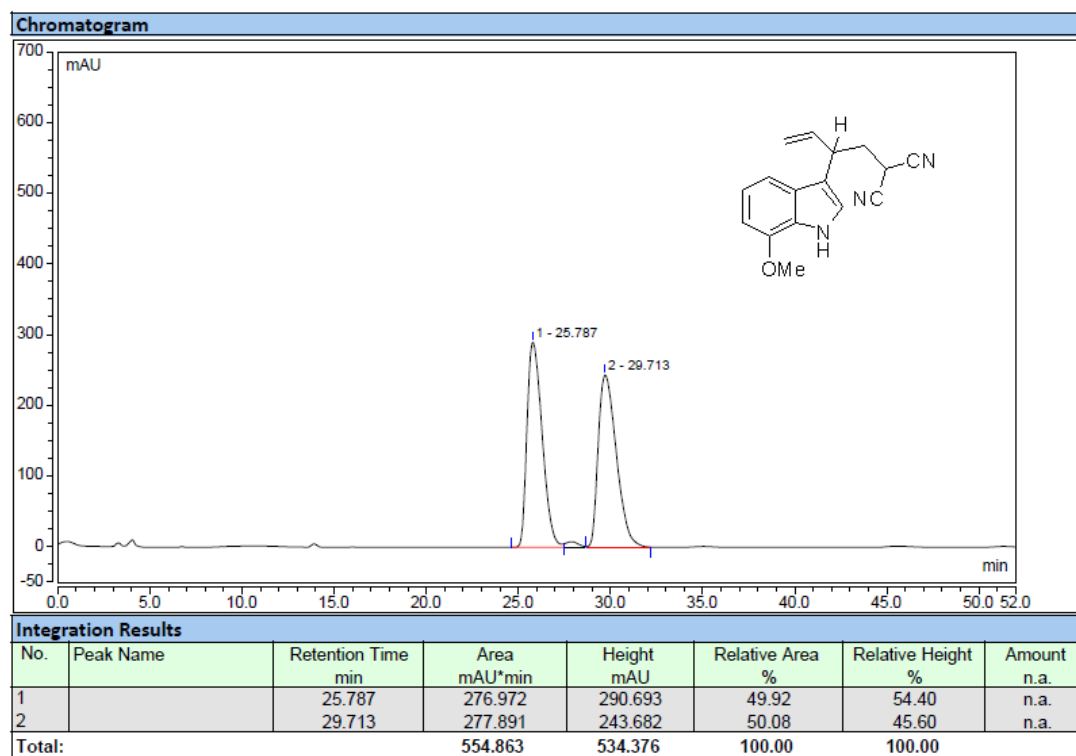

### Enantioselective

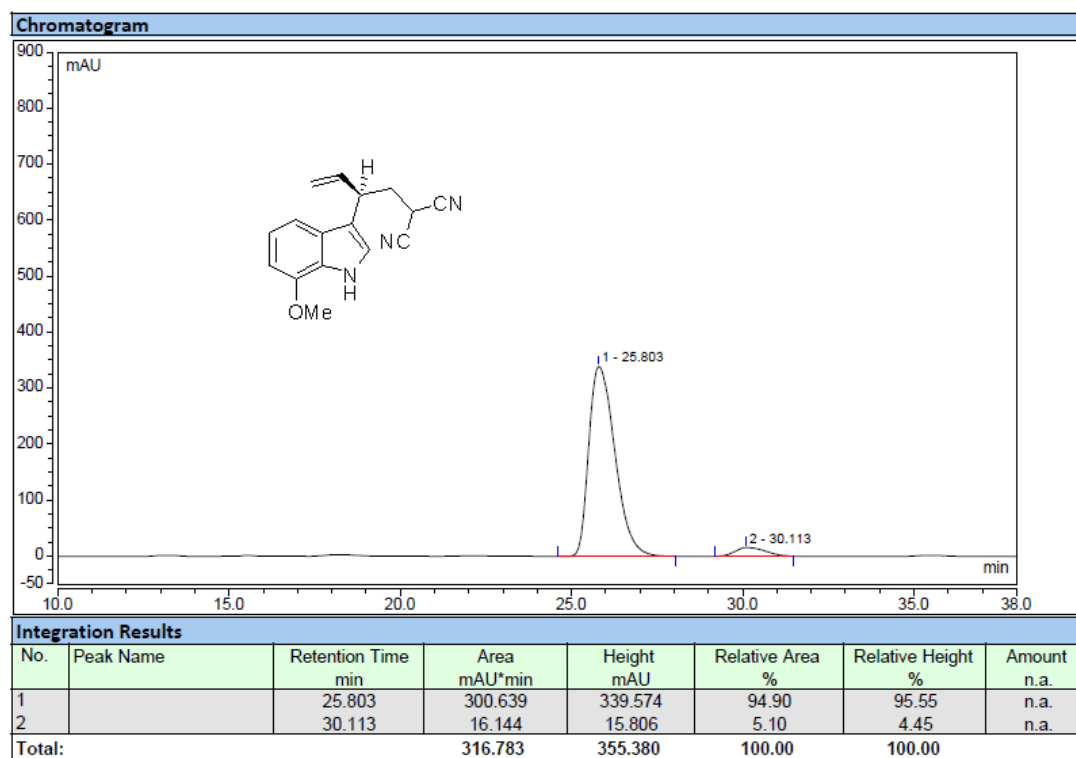

### 3na Racemic

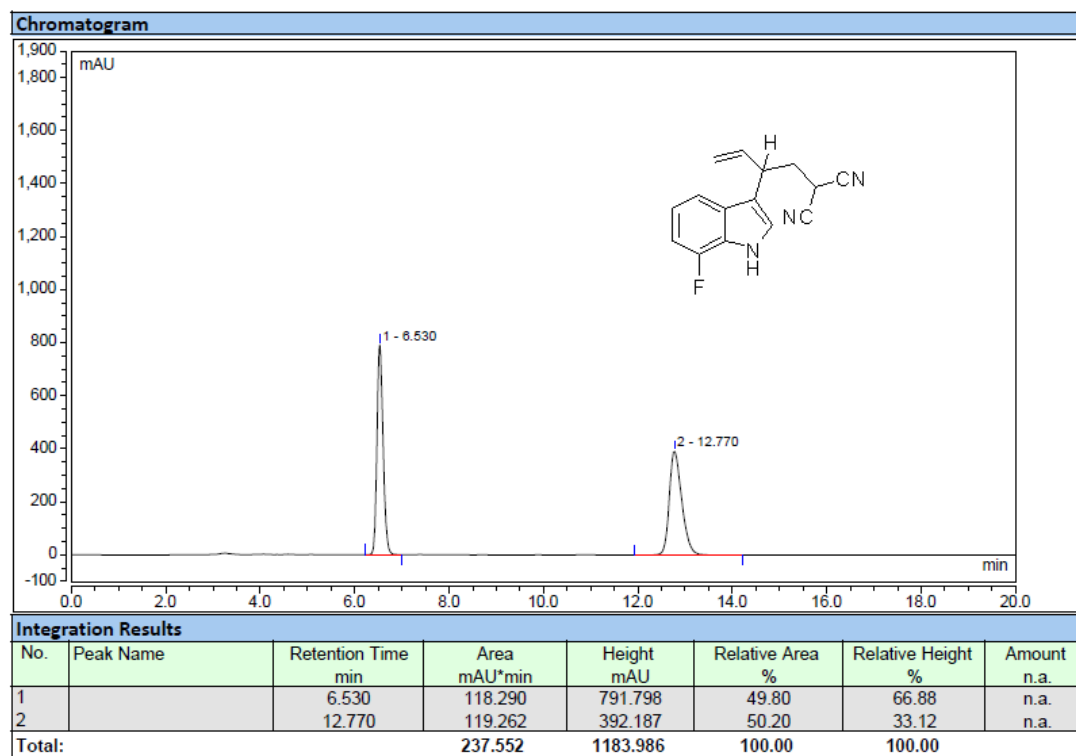

### Enantioselective

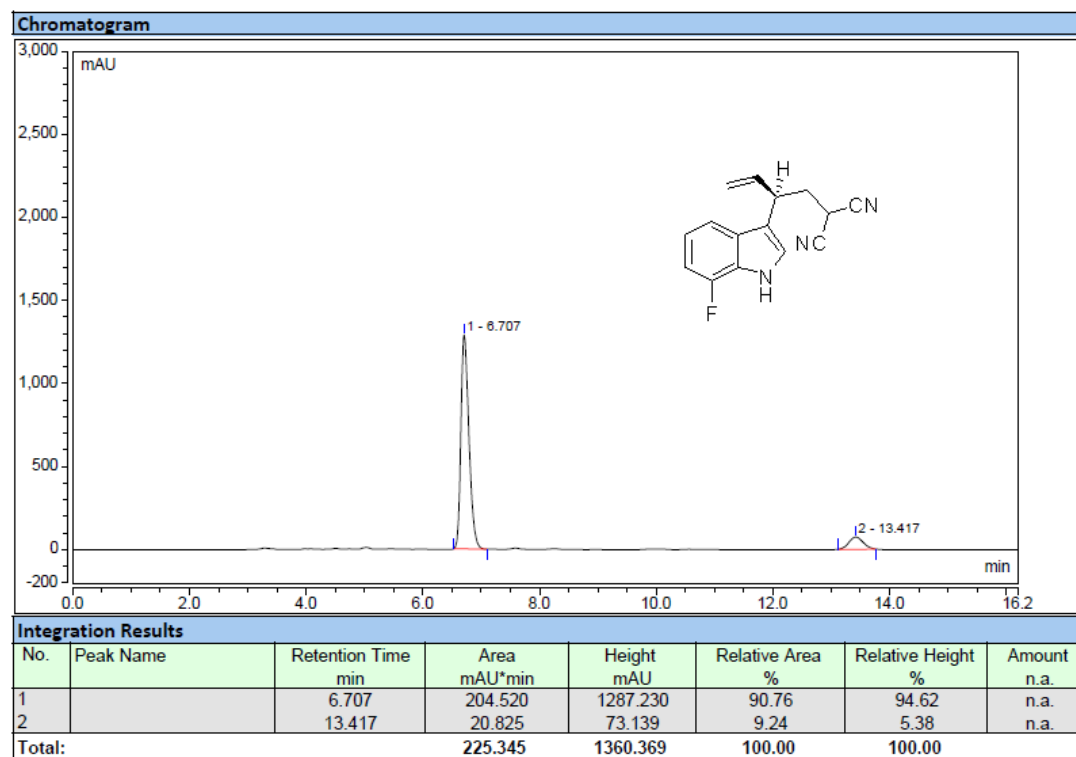

### 30a Racemic

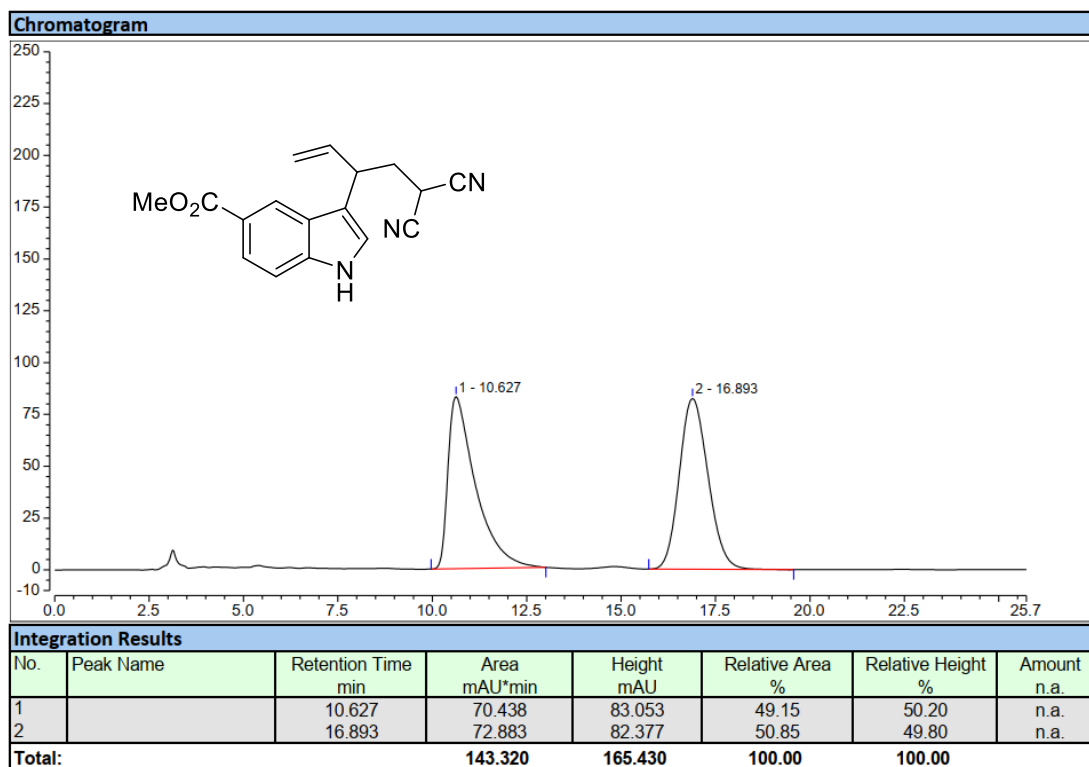

### Enantioselective

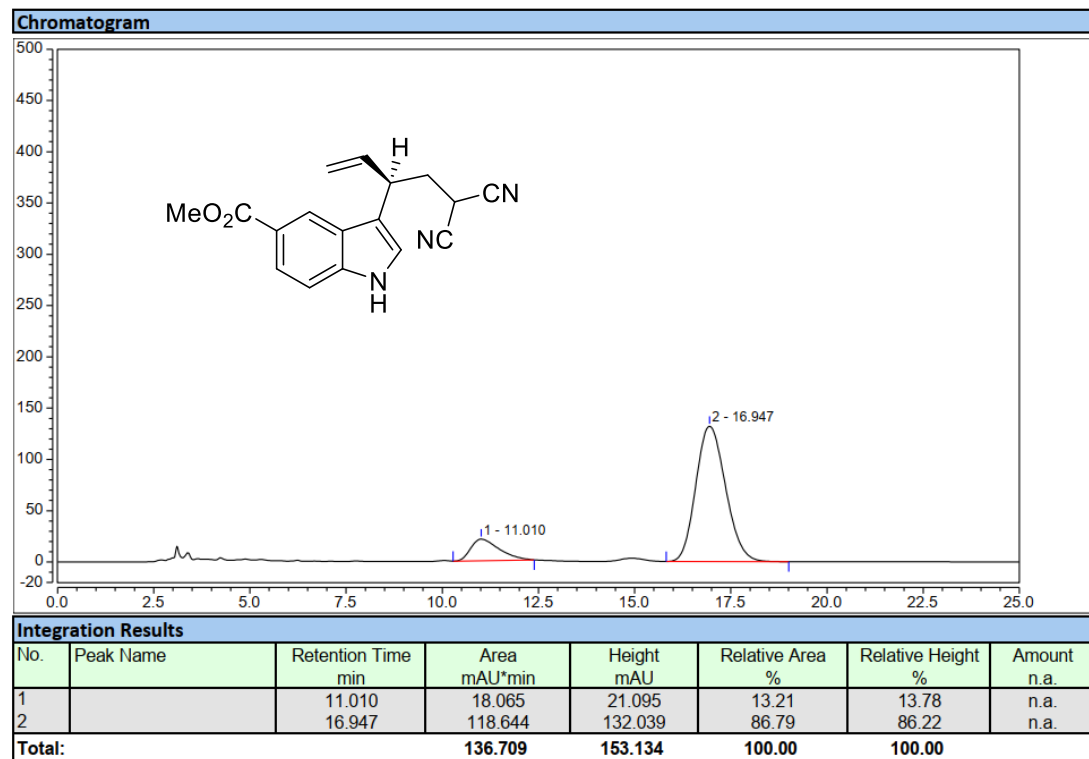

### 3qa Racemic

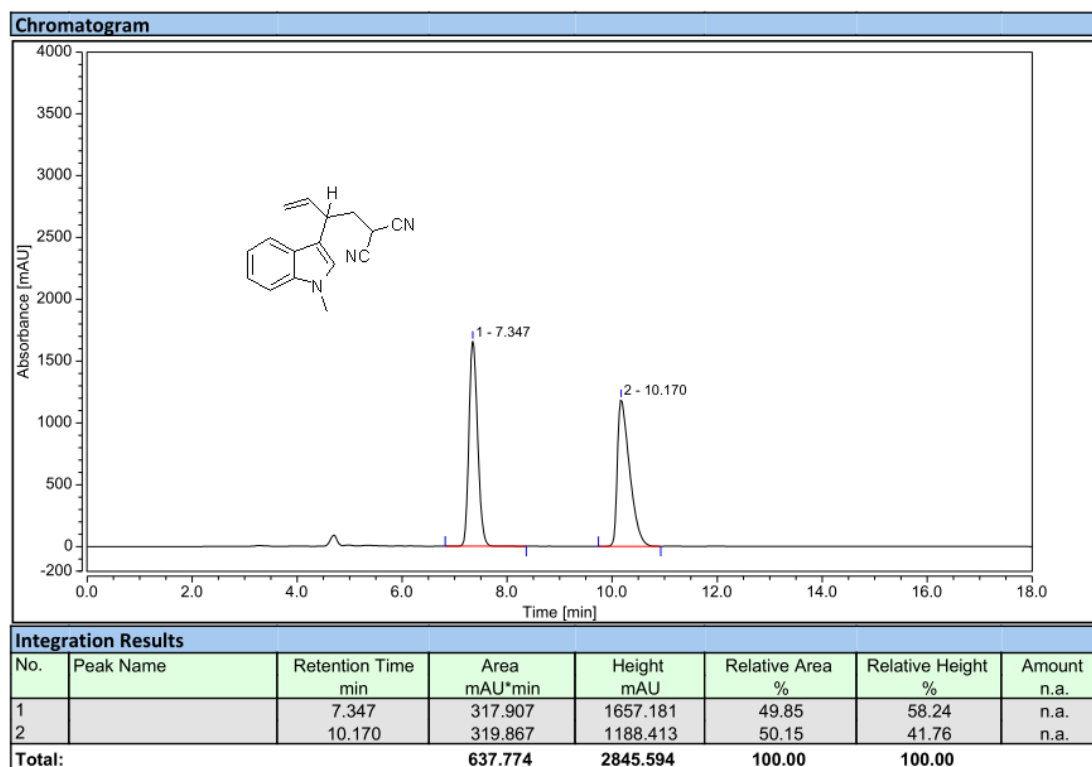

### Enantioselective

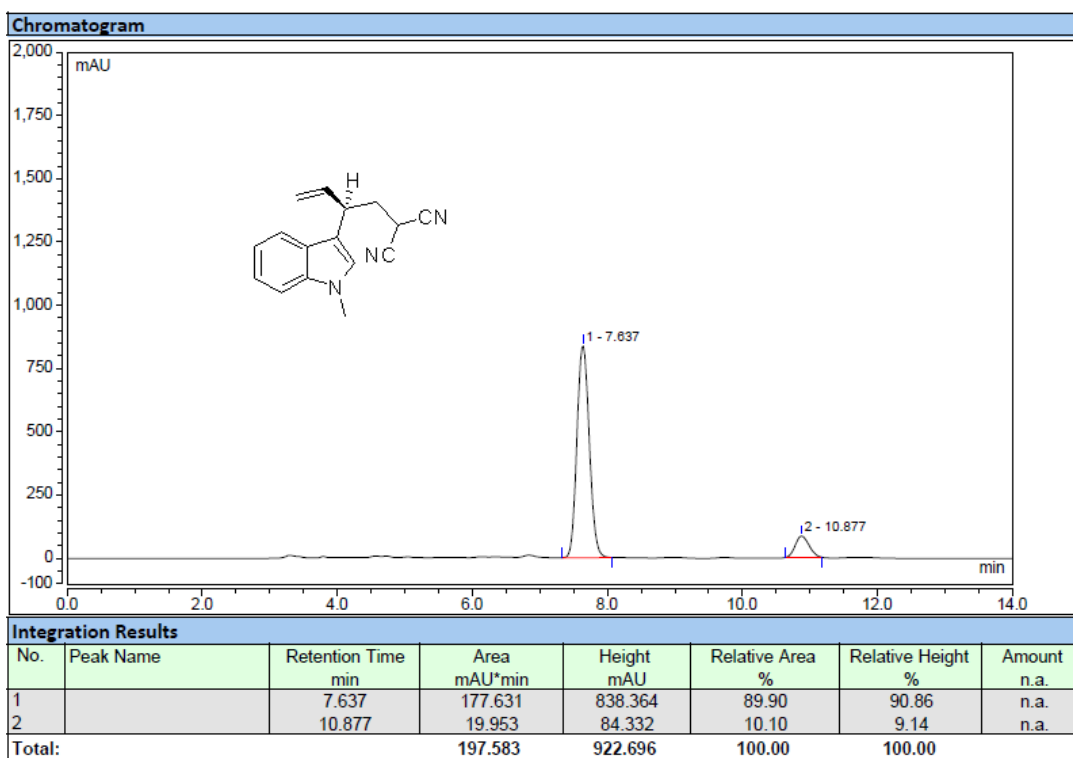

### 3ab Racemic

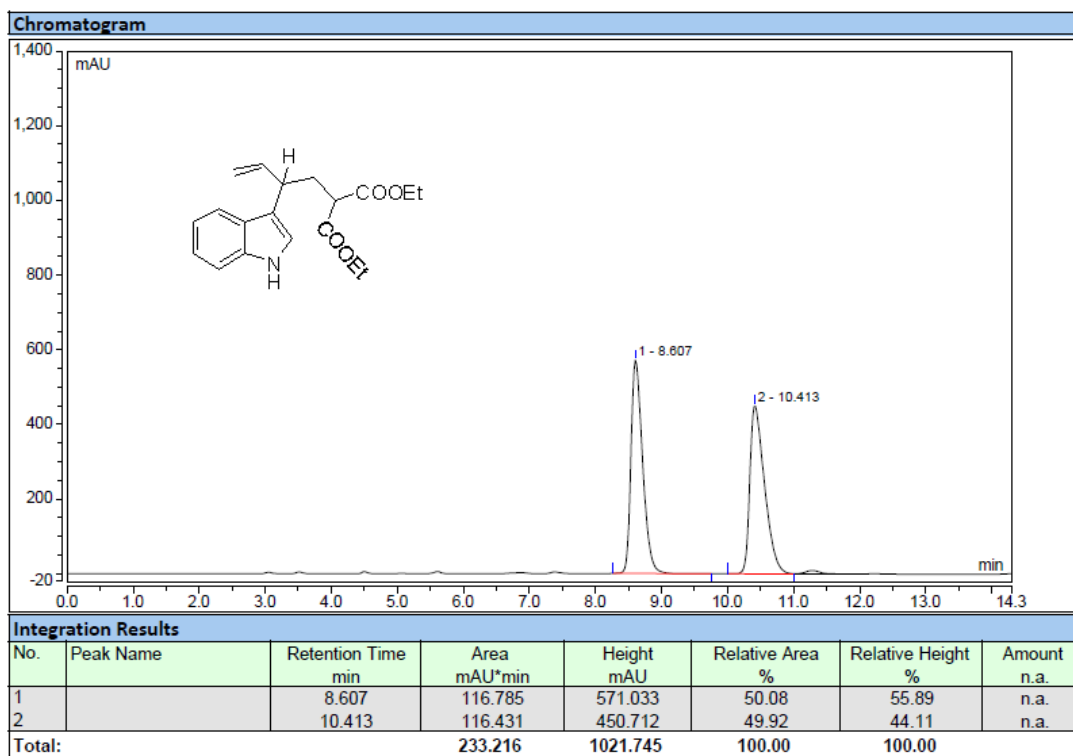

### Enantioselective

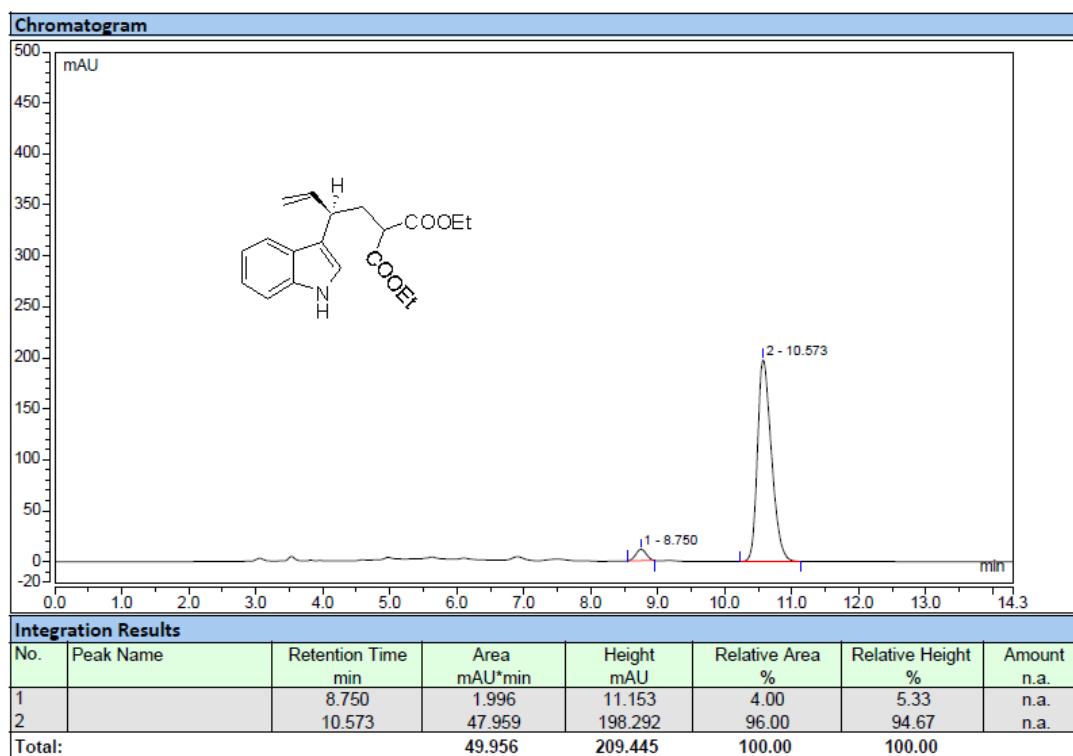

### 3bb Racemic

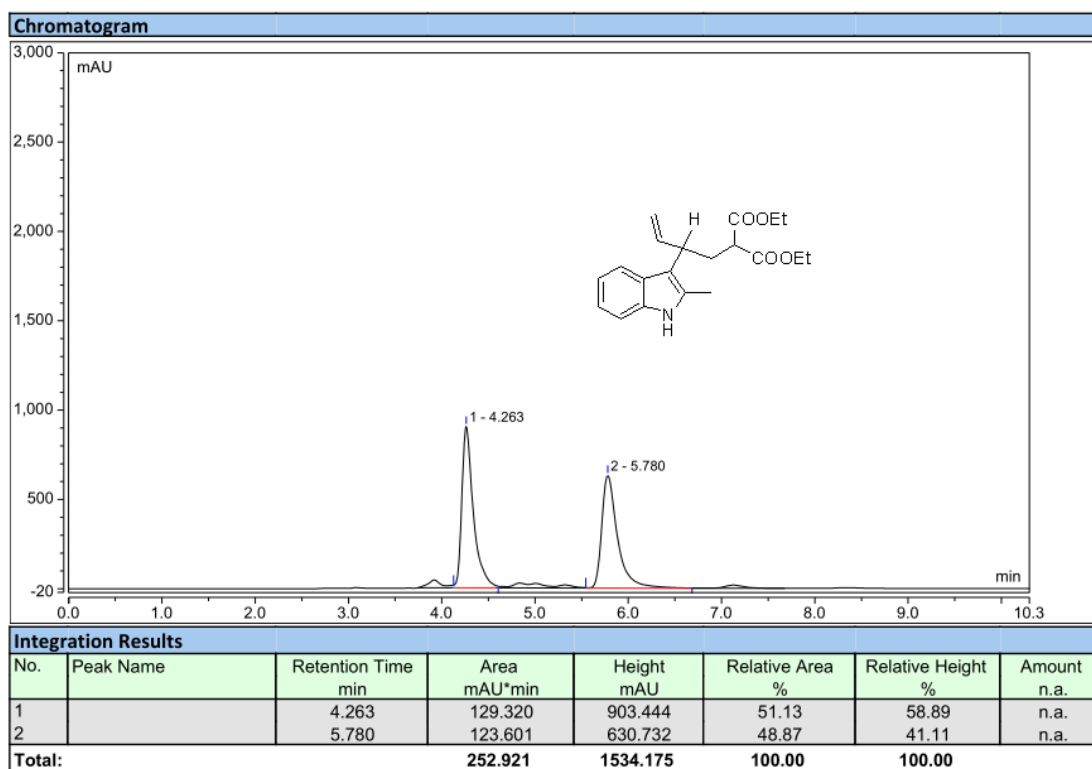

### Enantioselective

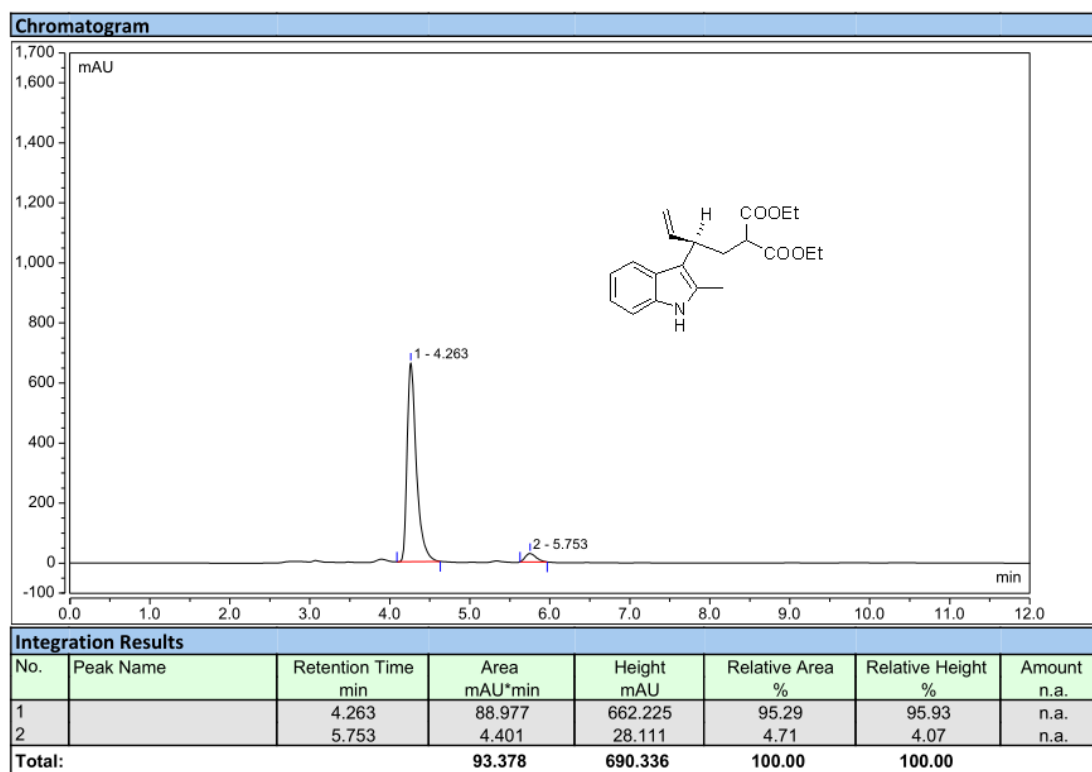

### 3eb Racemic

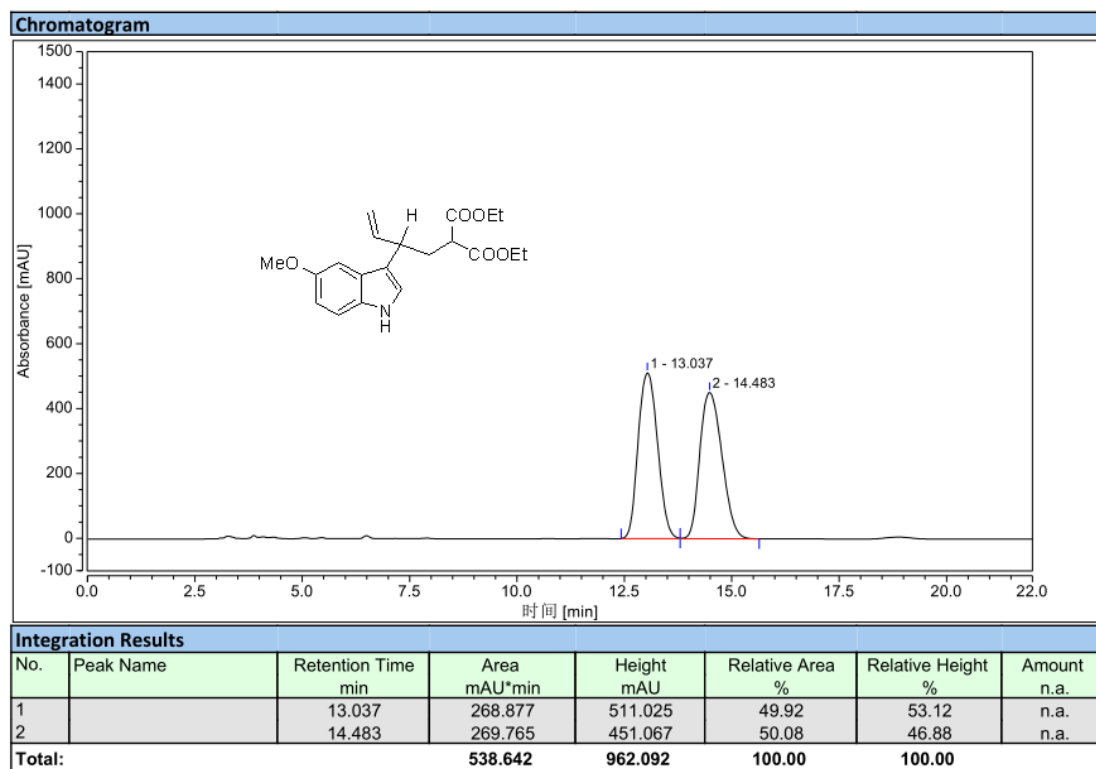

### Enantioselective

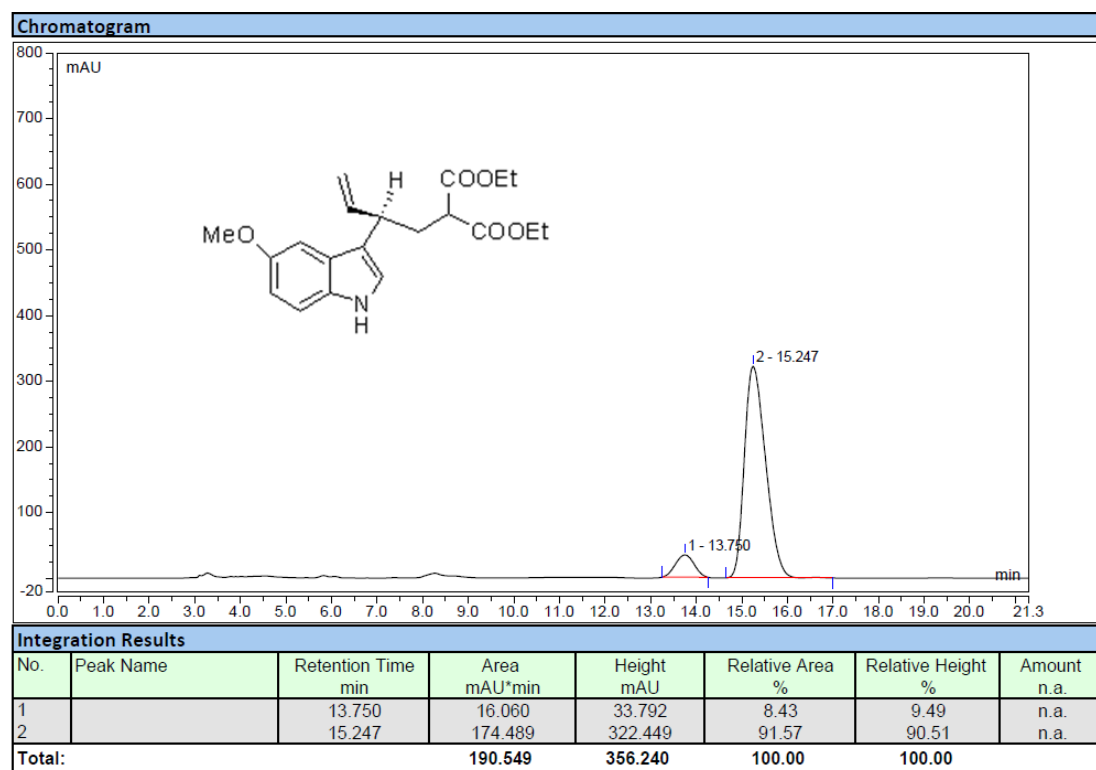



### 3ib Racemic

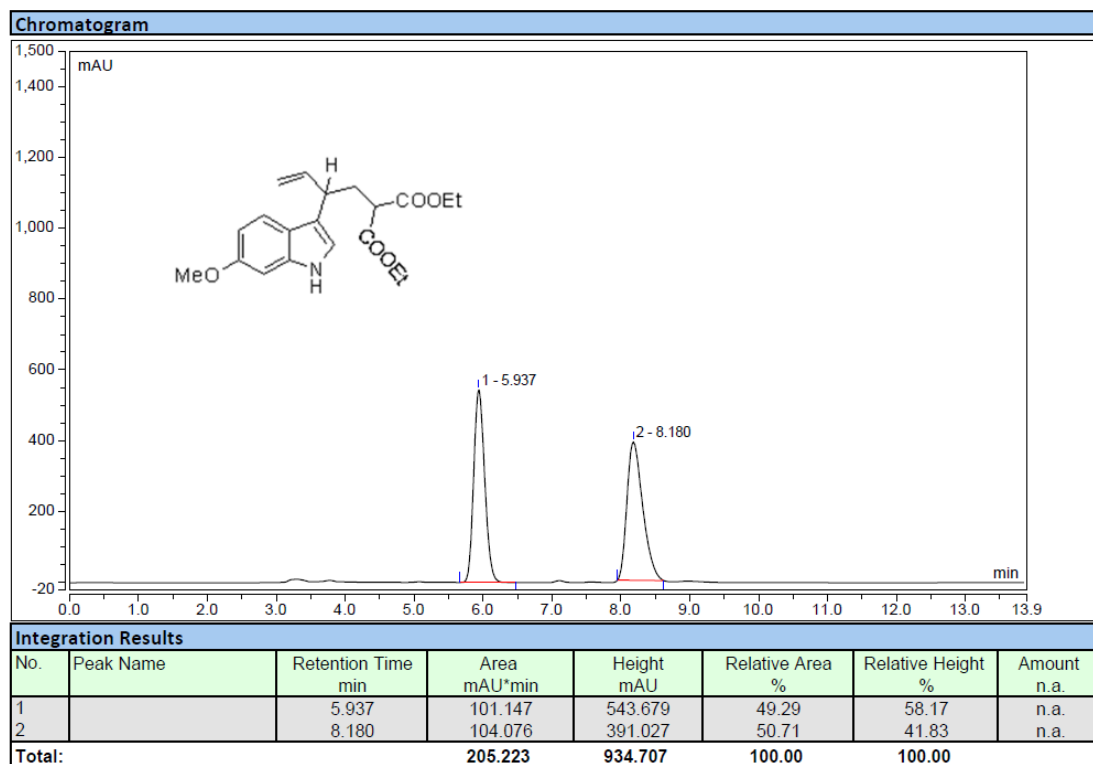

### Enantioselective

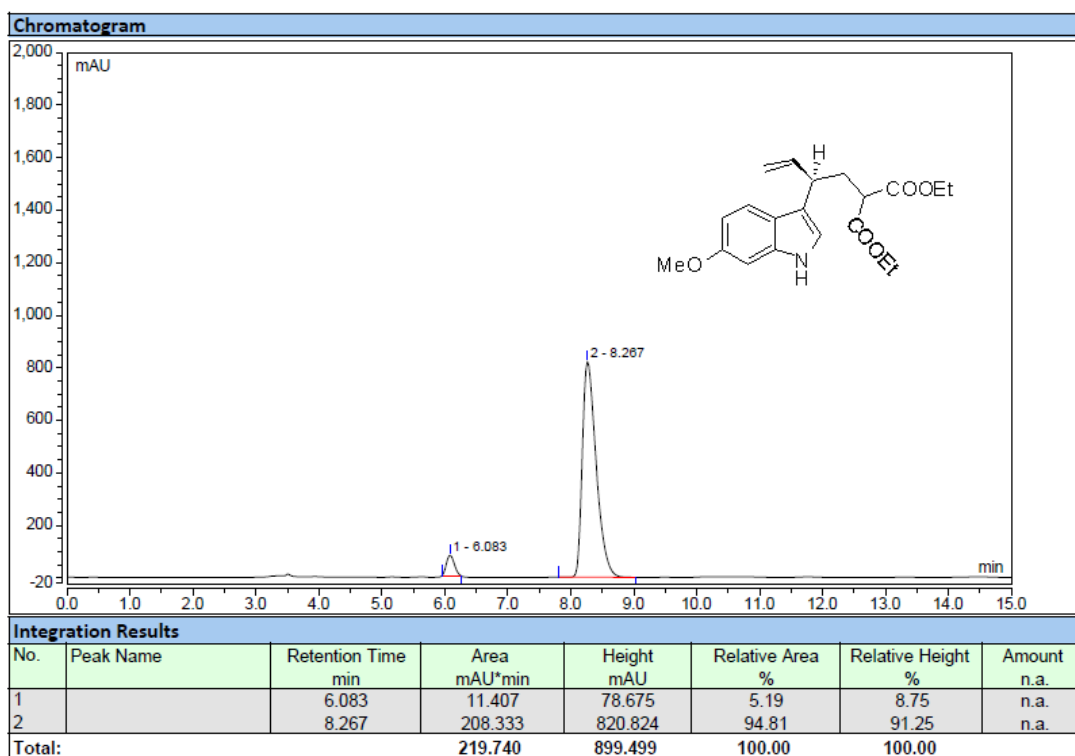

### 3jb Racemic

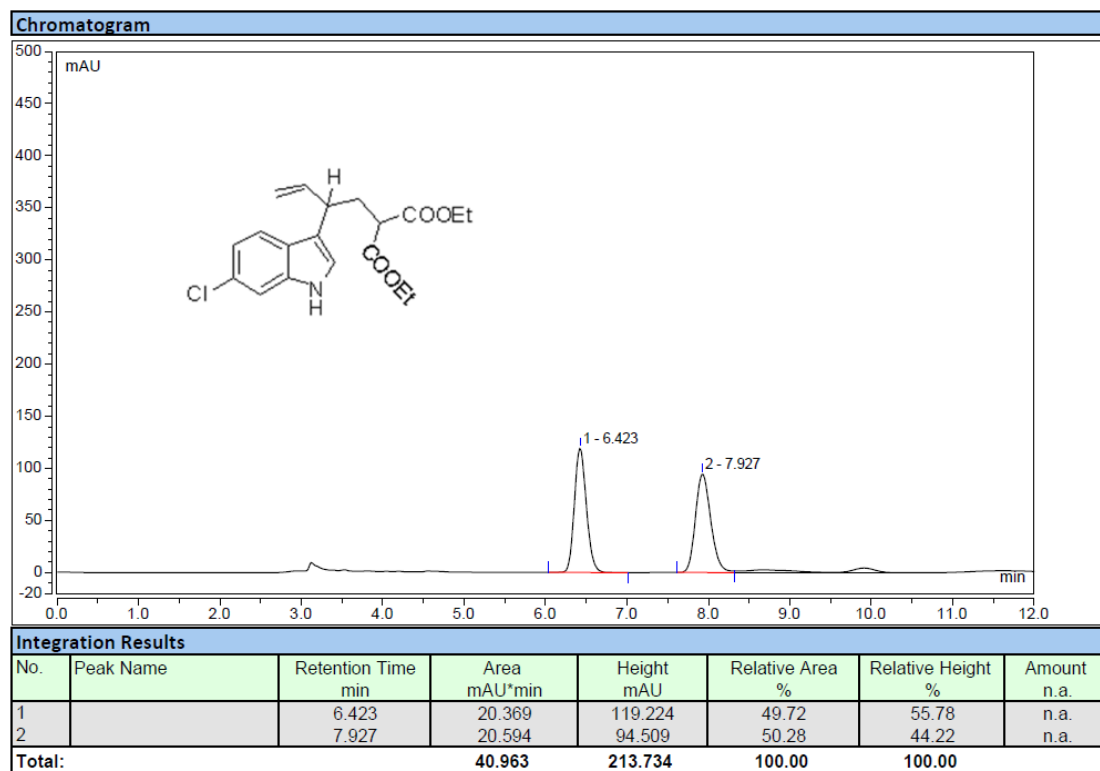

### Enantioselective

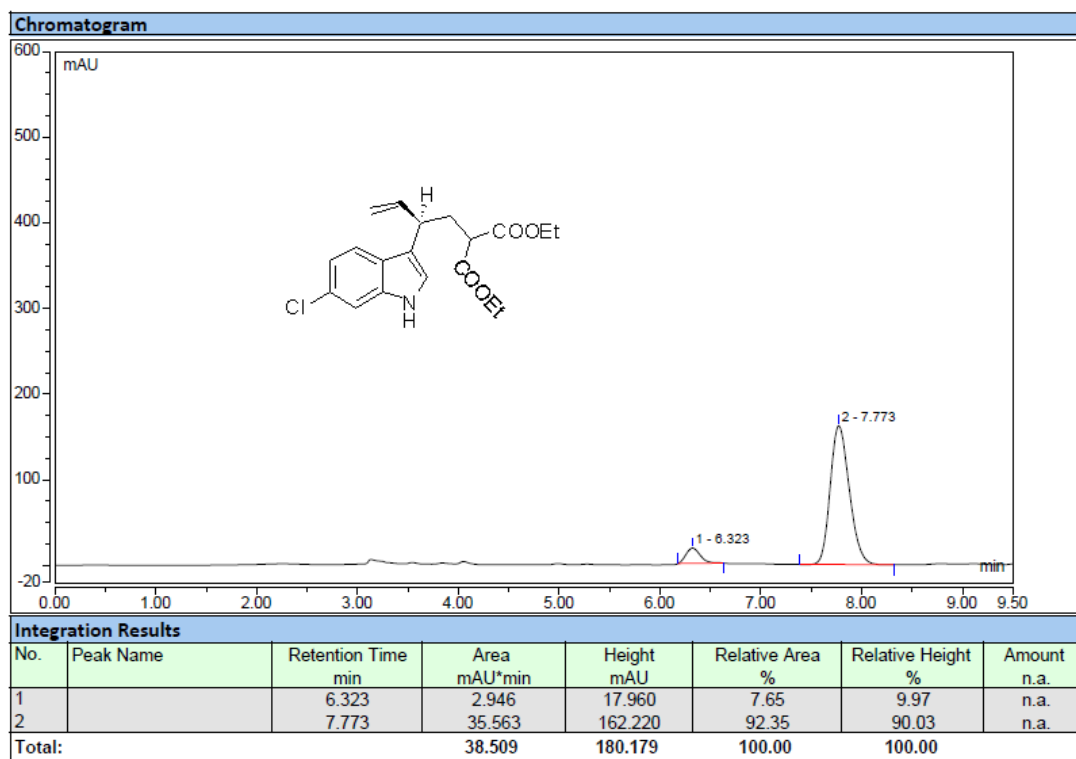

### 31b Racemic

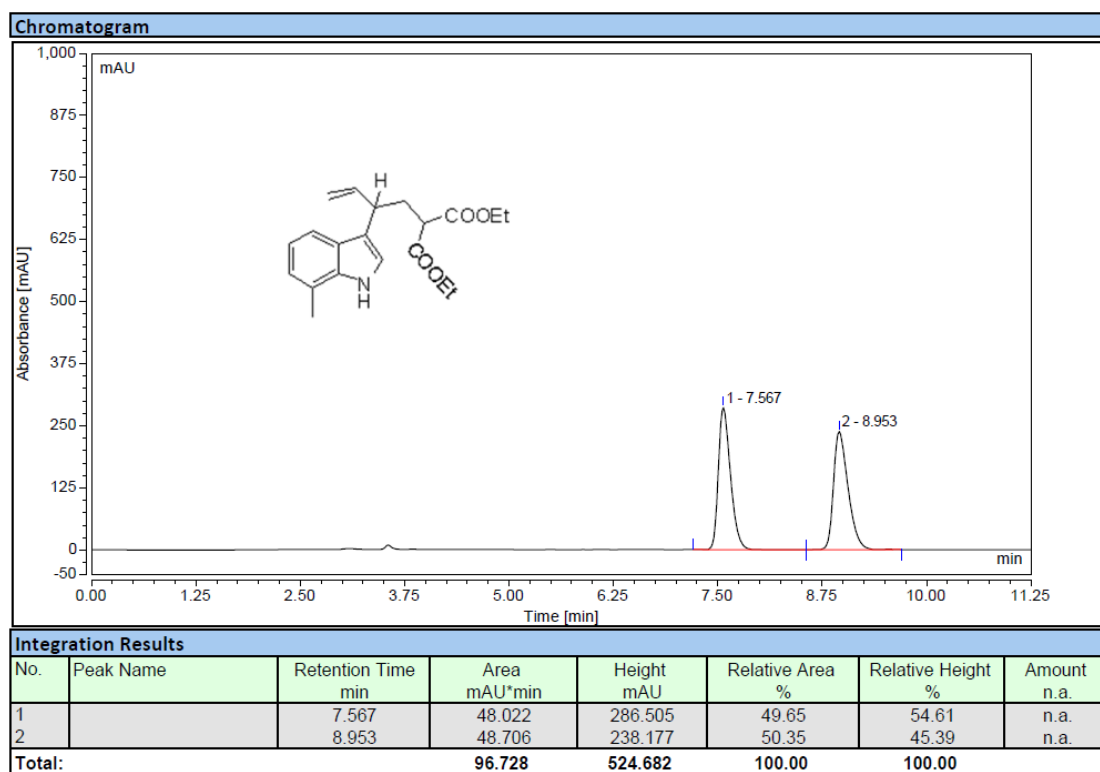

### Enantioselective

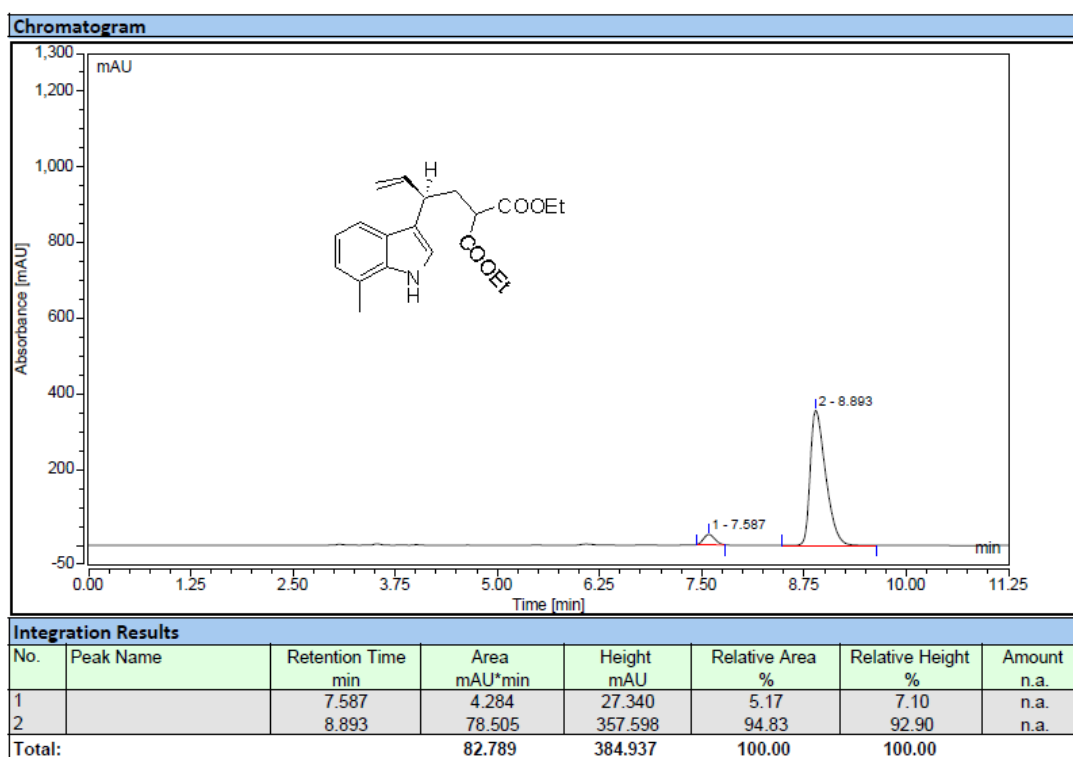

### 3mb Racemic

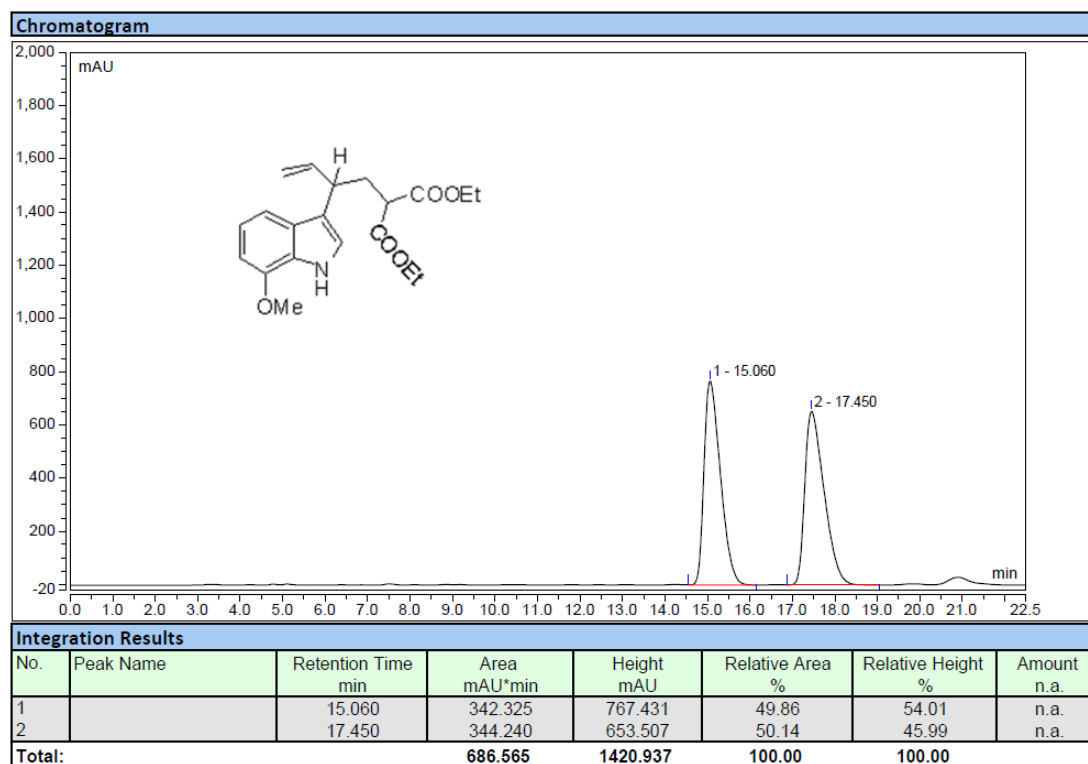

### Enantioselective

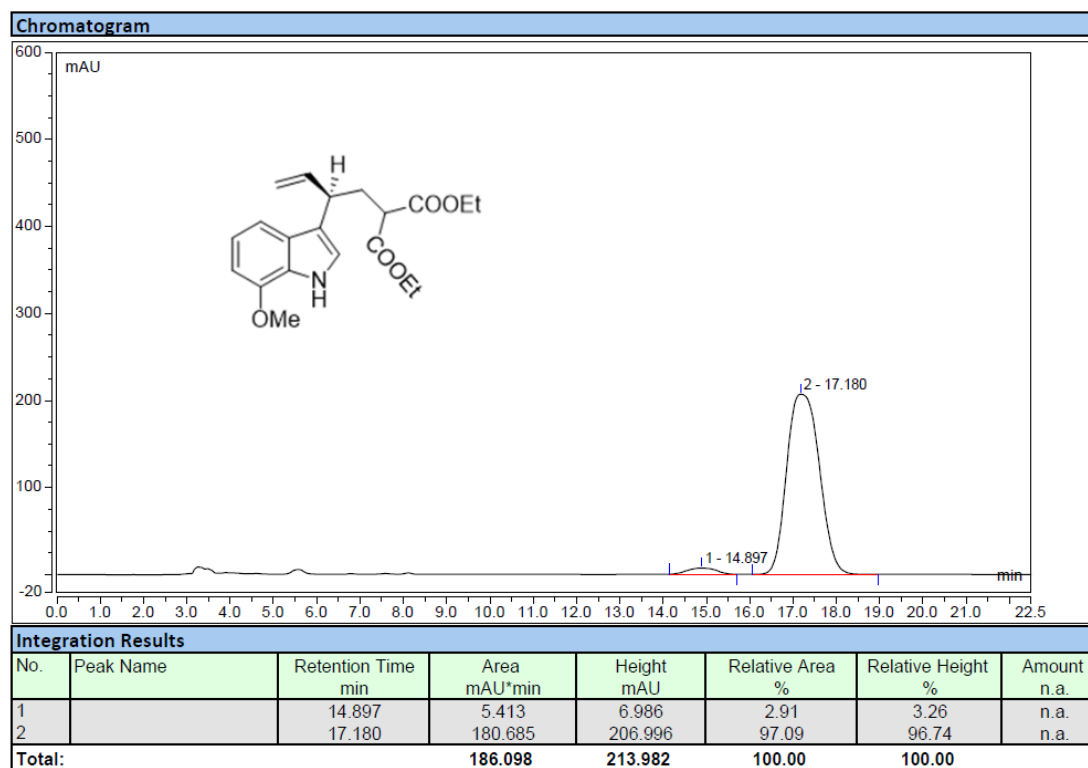

### 3qb Racemic

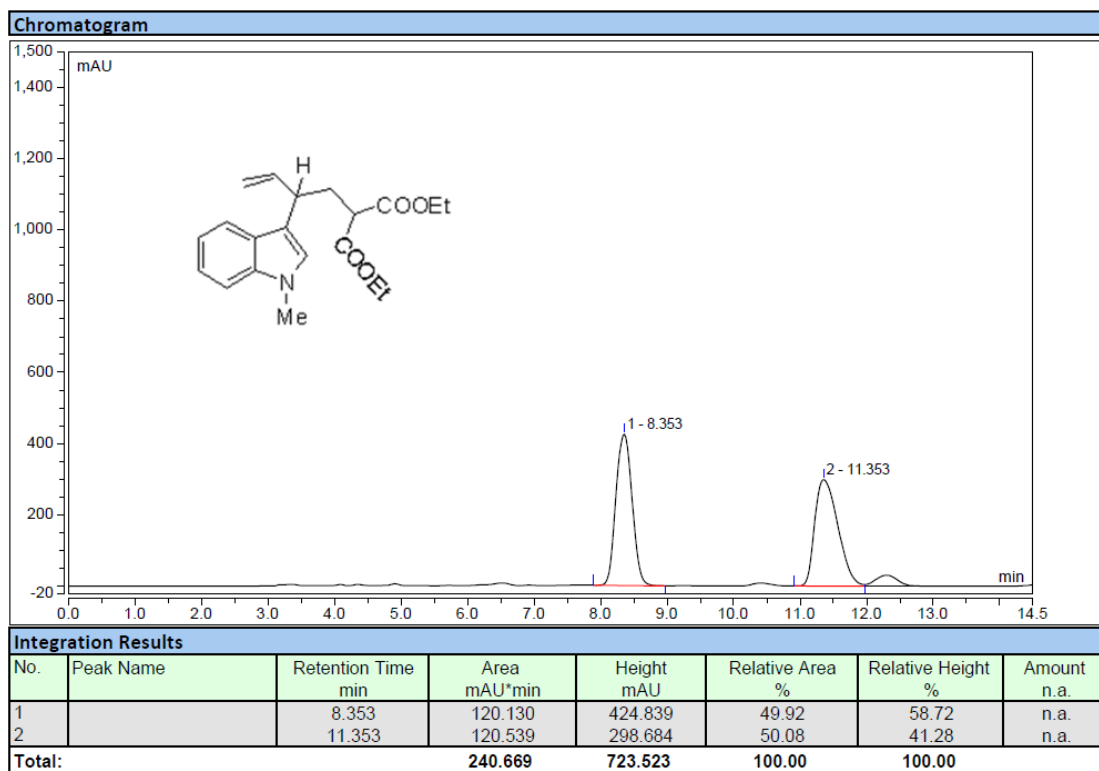

### Enantioselective

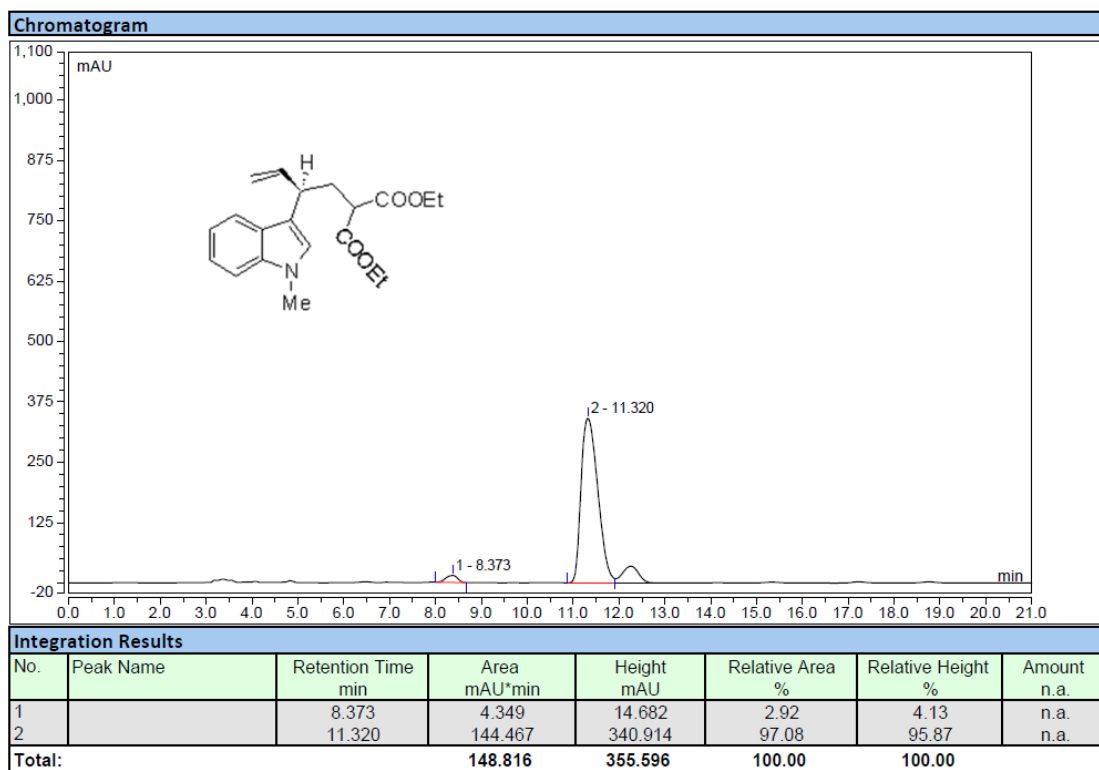

## Compound 5: Racemic

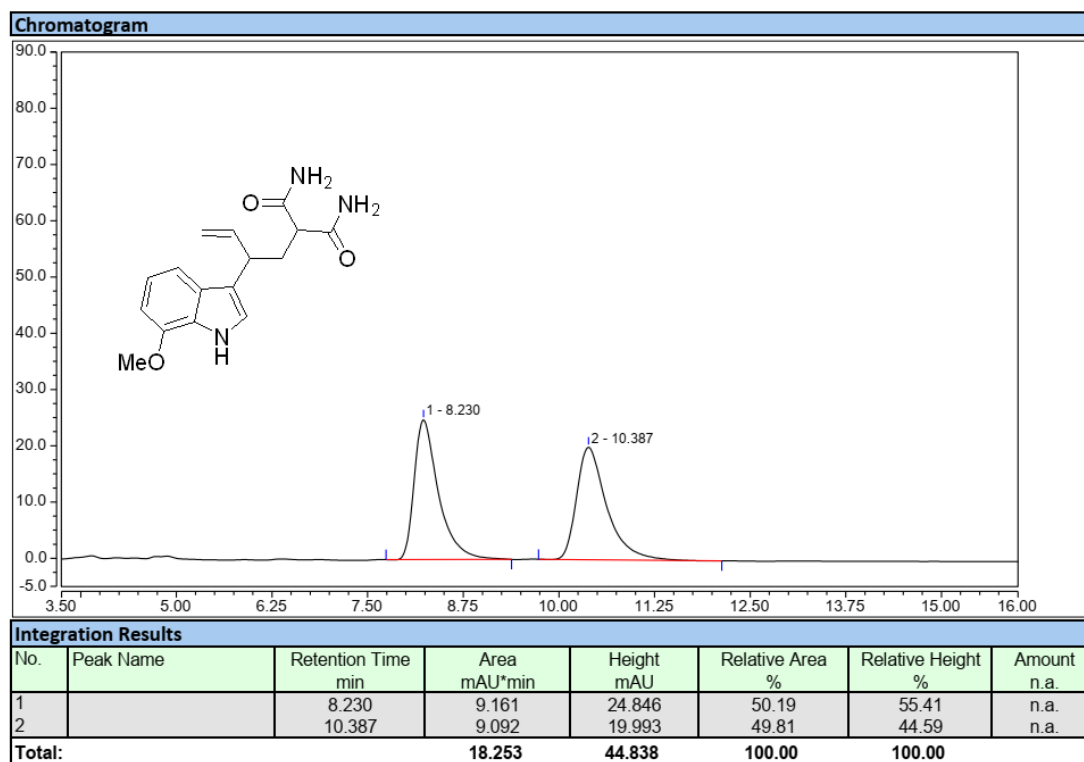

## Enantioselective

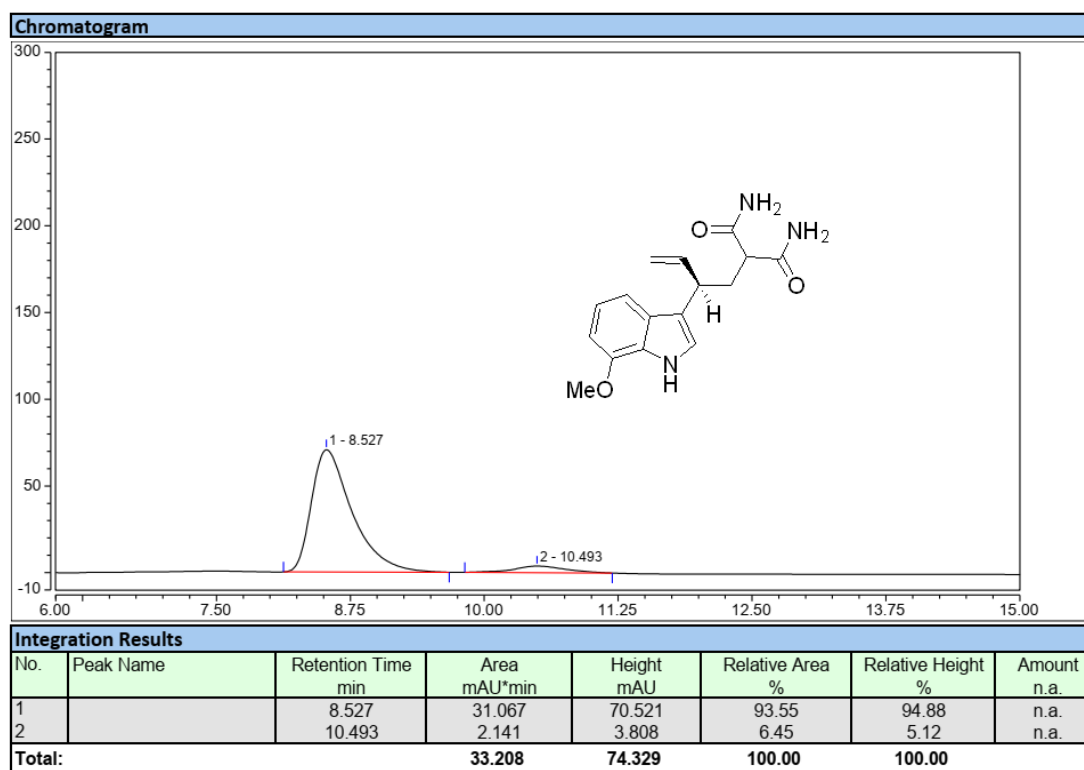

## Compound 6: Racemic

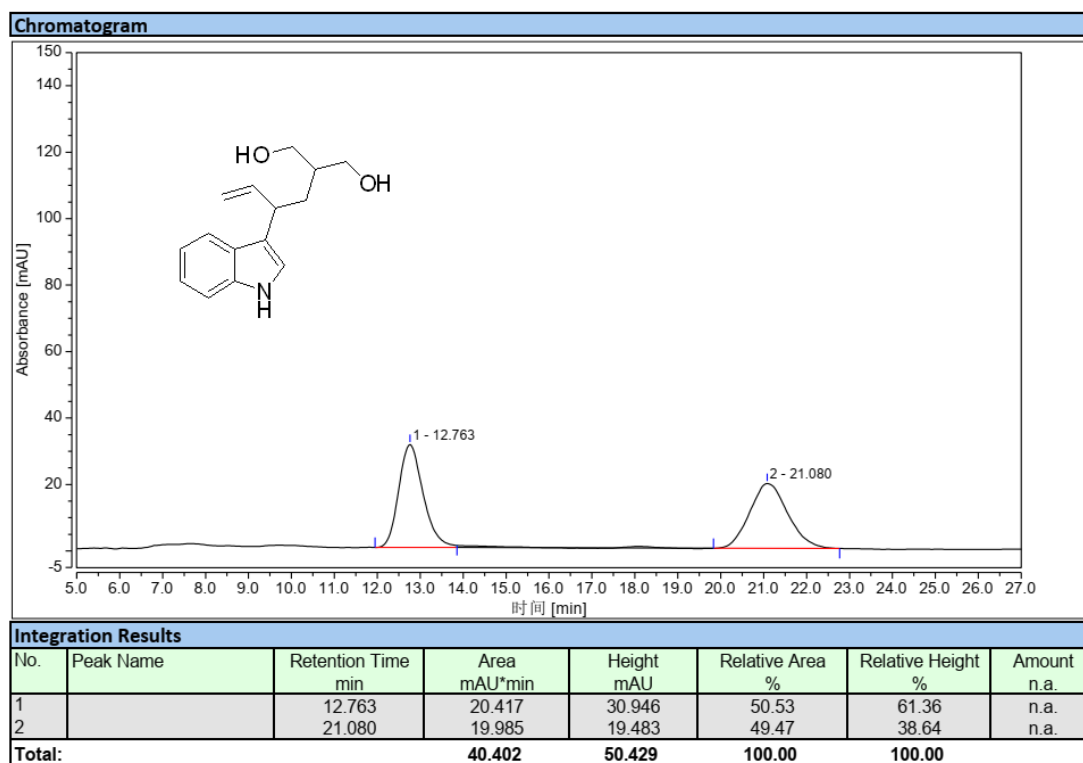

## Enantioselective

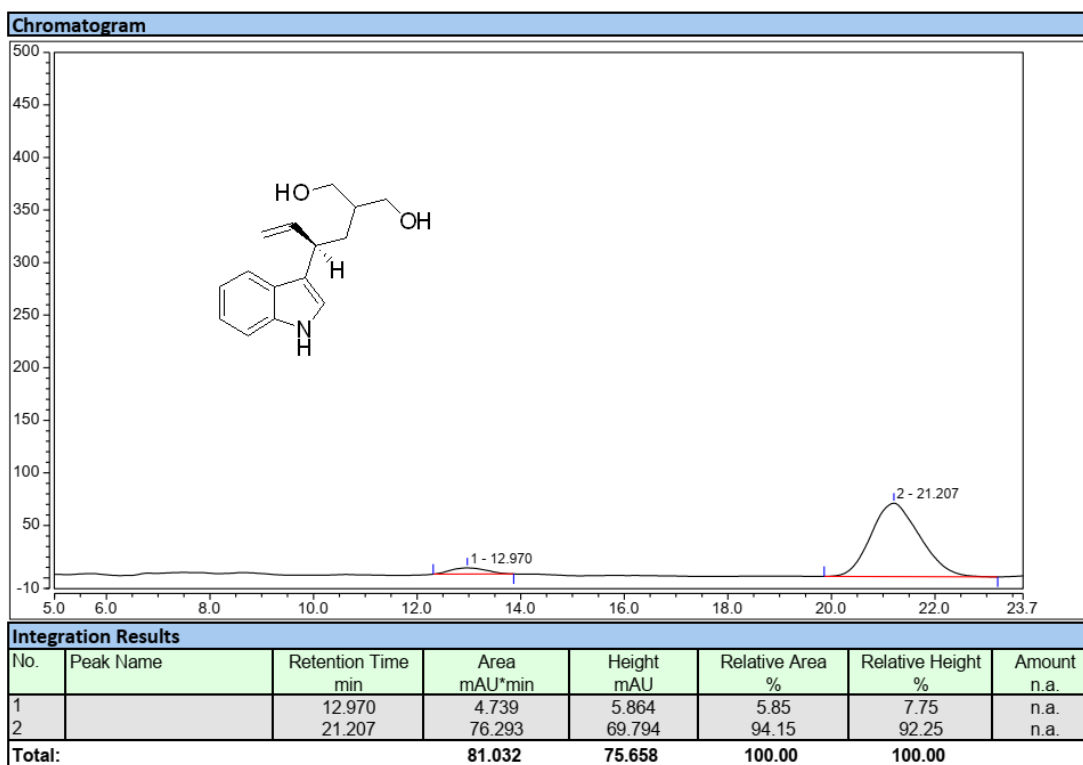

### 3. X-ray single-crystal data of product 3aa

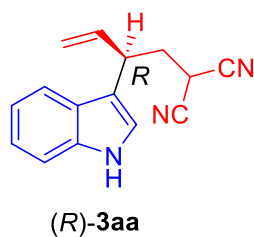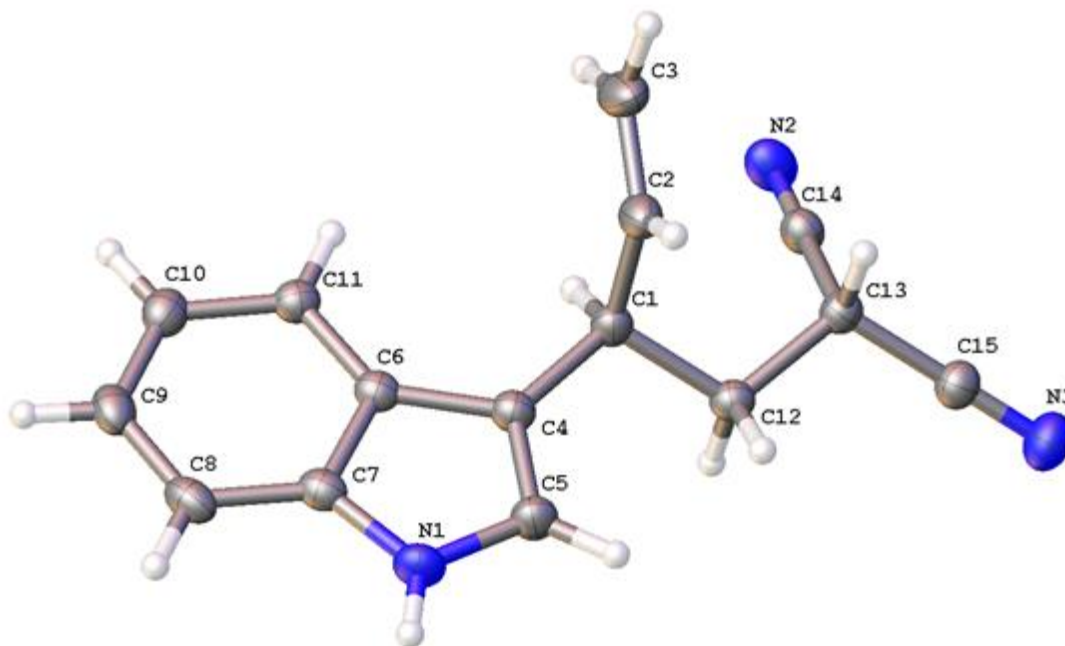

The thermal ellipsoid was drawn at the 30% probability level.

|                        |                                                |          |
|------------------------|------------------------------------------------|----------|
| Identification code    | 20181217sf_0m                                  |          |
| Empirical formula      | C <sub>15</sub> H <sub>13</sub> N <sub>3</sub> |          |
| Formula weight         | 235.28                                         |          |
| Temperature            | 169.97 K                                       |          |
| Wavelength             | 1.34139 Å                                      |          |
| Crystal system         | Orthorhombic                                   |          |
| Space group            | P2 <sub>1</sub> 2 <sub>1</sub> 2 <sub>1</sub>  |          |
| Unit cell dimensions   | a = 5.6046(4) Å                                | α = 90 ° |
|                        | b = 8.4709(6) Å                                | β = 90 ° |
|                        | c = 27.2897(18) Å                              | γ = 90 ° |
| Volume                 | 1295.61(16) Å <sup>3</sup>                     |          |
| Z                      | 4                                              |          |
| Density (calculated)   | 1.206 Mg/m <sup>3</sup>                        |          |
| Absorption coefficient | 0.372 mm <sup>-1</sup>                         |          |
| F(000)                 | 496                                            |          |
| Crystal size           | 0.12 x 0.1 x 0.01 mm <sup>3</sup>              |          |



|                                   |                                             |
|-----------------------------------|---------------------------------------------|
| Theta range for data collection   | 4.755 to 54.877 °                           |
| Index ranges                      | -6<=h<=5, -10<=k<=10, -32<=l<=33            |
| Reflections collected             | 9001                                        |
| Independent reflections           | 2303 [R(int) = 0.0218]                      |
| Completeness to theta = 53.594 °  | 96.7 %                                      |
| Absorption correction             | Semi-empirical from equivalents             |
| Max. and min. transmission        | 0.7508 and 0.5269                           |
| Refinement method                 | Full-matrix least-squares on F <sup>2</sup> |
| Data / restraints / parameters    | 2303 / 0 / 171                              |
| Goodness-of-fit on F <sup>2</sup> | 1.205                                       |
| Final R indices [I>2sigma(I)]     | R1 = 0.0362, wR2 = 0.0858                   |
| R indices (all data)              | R1 = 0.0382, wR2 = 0.0869                   |
| Absolute structure parameter      | 0.07(18)                                    |
| Extinction coefficient            | n/a                                         |
| Largest diff. peak and hole       | 0.147 and -0.158 e.Å <sup>-3</sup>          |
